# Supplementary material
Source: publisher site journal article supplement (https://www.dovepress.com/get_supplementary_file.php?f=493892.xlsx)
Supplement: Supplementary file 1 [file get_supplementary_file.php]

## Sheet: Table S1
Supplement Table 1. The detailed parameters of the KEGG signaling pathways and biological processes in network pharmacology
Category	Term	Count	%	PValue	Genes	List Total	Pop Hits	Pop Total	Fold Enrichment	Bonferroni	Benjamini	FDR
KEGG_PATHWAY	hsa05200:Pathways in cancer	47	33.5714	0.0983586	CSF1R, GSK3B, HSP90AB1, ROCK2, GSTP1, XIAP, PIK3CD, PIK3CB, PTGS2, EGFR, IGF1R, IKBKB, CDC42, CASP7, CASP3, HMOX1, RAC1, JAK2, HRAS, JAK3, NTRK1, GSTM2, MAP2K1, HSP90AA1, GSTM1, NOS2, STAT1, MMP2, IGF1, F2, ESR1, TGFBR1, IL2, PGF, PTK2, MAPK10, AR, BMP2, CDK6, CDK4, KIT, CDK2, RARA, RARB, PPARG, MET, FGFR1	123	531	8205	5.90441	6.8495e-22	6.8495e-22	3.46568e-22
KEGG_PATHWAY	hsa05417:Lipid and atherosclerosis	28	20	0.0960932	GSK3B, HSP90AB1, ROCK2, SRC, PIK3CD, PIK3CB, ICAM1, IKBKB, CDC42, CASP7, CASP3, CCL5, CASP1, RAC1, JAK2, HRAS, HSPA8, XBP1, HSP90AA1, NOS3, MMP3, MAPK14, SOD2, SELE, PTK2, MAPK10, CYP2C9, PPARG	123	215	8205	8.68746	8.95801e-16	4.47901e-16	2.26627e-16
KEGG_PATHWAY	hsa04151:PI3K-Akt signaling pathway	29	20.7143	0.0809028	CSF1R, GSK3B, HSP90AB1, PIK3CD, PIK3CB, EGFR, PIK3CG, IGF1R, IKBKB, KDR, RAC1, JAK2, HRAS, JAK3, NTRK1, MAP2K1, HSP90AA1, NOS3, IGF1, IL2, PGF, PTK2, CDK6, CDK4, KIT, CDK2, TEK, MET, FGFR1	123	354	8205	5.46472	3.87067e-11	1.29061e-11	6.53019e-12
KEGG_PATHWAY	hsa01522:Endocrine resistance	17	12.1429	0.079971	MAP2K1, SRC, MMP2, PIK3CD, PIK3CB, IGF1, MAPK14, ESR1, EGFR, PTK2, IGF1R, MAPK10, CYP2D6, CDK4, HRAS	123	98	8205	11.5717	1.79851e-10	4.49655e-11	2.27515e-11
KEGG_PATHWAY	hsa04933:AGE-RAGE signaling pathway in diabetic complications	17	12.1429	0.0728179	NOS3, STAT1, MMP2, PIK3CD, PIK3CB, MAPK14, SELE, F3, TGFBR1, ICAM1, MAPK10, CDC42, CDK4, CASP3, RAC1, JAK2, HRAS	123	100	8205	11.3402	2.49183e-10	4.98358e-11	2.52157e-11
KEGG_PATHWAY	hsa05418:Fluid shear stress and atherosclerosis	19	13.5714	0.0695166	GSTM2, HSP90AA1, GSTM1, HSP90AB1, NOS3, SRC, GSTP1, MMP2, PIK3CD, PIK3CB, MAPK14, SELE, PTK2, ICAM1, MAPK10, IKBKB, KDR, HMOX1, RAC1	123	139	8205	9.11827	3.67477e-10	6.12441e-11	3.09881e-11
KEGG_PATHWAY	hsa05215:Prostate cancer	16	11.4286	0.0595435	GSK3B, MAP2K1, HSP90AA1, HSP90AB1, GSTP1, MMP3, PIK3CD, PIK3CB, IGF1, EGFR, IGF1R, IKBKB, AR, CDK2, HRAS, FGFR1	123	97	8205	11.0033	2.23621e-09	3.19457e-10	1.61638e-10
KEGG_PATHWAY	hsa05205:Proteoglycans in cancer	21	15	0.0595435	MAP2K1, ROCK2, SRC, MMP2, PIK3CD, PTPN11, PIK3CB, IGF1, MAPK14, ESR1, EGFR, PTK2, IGF1R, CDC42, PPP1CC, CASP3, KDR, RAC1, HRAS, MET, FGFR1	123	205	8205	6.83343	4.03402e-09	5.04253e-10	2.5514e-10
KEGG_PATHWAY	hsa04014:Ras signaling pathway	22	15.7143	0.0561357	NTRK1, CSF1R, MAP2K1, PLA2G2A, PIK3CD, PTPN11, PIK3CB, IGF1, EGFR, PGF, IGF1R, MAPK10, CDC42, IKBKB, ZAP70, KIT, KDR, TEK, RAC1, HRAS, MET, FGFR1	123	236	8205	6.21848	6.96141e-09	7.73489e-10	3.91367e-10
KEGG_PATHWAY	hsa04370:VEGF signaling pathway	13	9.28571	0.0559047	MAP2K1, NOS3, SRC, PIK3CD, PIK3CB, PTGS2, MAPK14, PTK2, CDC42, MAPKAPK2, KDR, RAC1, HRAS	123	59	8205	14.6982	1.05221e-08	1.05221e-09	5.32391e-10
KEGG_PATHWAY	hsa05167:Kaposi sarcoma-associated herpesvirus infection	19	13.5714	0.0525456	GSK3B, MAP2K1, STAT1, SRC, PIK3CD, PIK3CB, PTGS2, MAPK14, PIK3CG, ICAM1, MAPK10, IKBKB, CDK6, CDK4, CASP3, MAPKAPK2, RAC1, JAK2, HRAS	123	194	8205	6.53319	1.0591e-07	9.62819e-09	4.87163e-09
KEGG_PATHWAY	hsa04510:Focal adhesion	19	13.5714	0.0525456	GSK3B, MAP2K1, ROCK2, SRC, XIAP, PIK3CD, PIK3CB, IGF1, EGFR, PGF, PTK2, IGF1R, MAPK10, CDC42, PPP1CC, KDR, RAC1, HRAS, MET	123	201	8205	6.30567	1.89404e-07	1.57837e-08	7.98618e-09
KEGG_PATHWAY	hsa05135:Yersinia infection	16	11.4286	0.0503206	GSK3B, MAP2K1, ROCK2, SRC, PIK3CD, PIK3CB, MAPK14, IL2, PTK2, MAPK10, CDC42, IKBKB, ZAP70, LCK, CASP1, RAC1	123	137	8205	7.79064	3.4158e-07	2.62754e-08	1.32947e-08
KEGG_PATHWAY	hsa04015:Rap1 signaling pathway	19	13.5714	0.0494521	CSF1R, MAP2K1, SRC, PIK3CD, PIK3CB, IGF1, MAPK14, EGFR, PGF, IGF1R, CDC42, ADORA2A, KIT, KDR, TEK, RAC1, HRAS, MET, FGFR1	123	210	8205	6.03542	3.86202e-07	2.75858e-08	1.39578e-08
KEGG_PATHWAY	hsa04010:MAPK signaling pathway	22	15.7143	0.0491604	NTRK1, HSPA8, CSF1R, MAP2K1, IGF1, MAPK14, EGFR, TGFBR1, PGF, IGF1R, MAPK10, CDC42, IKBKB, CASP3, KIT, MAPKAPK2, KDR, TEK, RAC1, HRAS, MET, FGFR1	123	294	8205	4.9917	4.19025e-07	2.7935e-08	1.41345e-08
KEGG_PATHWAY	hsa04660:T cell receptor signaling pathway	14	10	0.0398437	GSK3B, MAP2K1, PIK3CD, PIK3CB, MAPK14, IL2, MAPK10, CDC42, IKBKB, ZAP70, CDK4, LCK, PRKCQ, HRAS	123	104	8205	8.97983	8.93252e-07	5.58283e-08	2.82478e-08
KEGG_PATHWAY	hsa05120:Epithelial cell signaling in Helicobacter pylori infection	12	8.57143	0.0349895	MAPK10, CDC42, IKBKB, ADAM17, SRC, CCL5, CASP3, PTPN11, RAC1, MAPK14, MET, EGFR	123	70	8205	11.4355	1.29085e-06	7.59321e-08	3.84198e-08
KEGG_PATHWAY	hsa04659:Th17 cell differentiation	14	10	0.0339978	HSP90AA1, HSP90AB1, STAT1, MAPK14, TGFBR1, IL2, MAPK10, IKBKB, ZAP70, LCK, RARA, PRKCQ, JAK2, JAK3	123	108	8205	8.64724	1.43044e-06	7.94687e-08	4.02093e-08
KEGG_PATHWAY	hsa05235:PD-L1 expression and PD-1 checkpoint pathway in cancer	13	9.28571	0.0306246	MAP2K1, STAT1, PIK3CD, PTPN11, PIK3CB, MAPK14, EGFR, IKBKB, ZAP70, LCK, PRKCQ, JAK2, HRAS	123	89	8205	9.74377	1.53355e-06	8.07135e-08	4.08391e-08
KEGG_PATHWAY	hsa05212:Pancreatic cancer	12	8.57143	0.0285614	MAPK10, CDC42, IKBKB, MAP2K1, CDK6, STAT1, CDK4, PIK3CD, RAC1, PIK3CB, EGFR, TGFBR1	123	76	8205	10.5327	3.16949e-06	1.58475e-07	8.01844e-08
KEGG_PATHWAY	hsa01521:EGFR tyrosine kinase inhibitor resistance	12	8.57143	0.0274021	GSK3B, MAP2K1, SRC, KDR, PIK3CD, IGF1, PIK3CB, JAK2, HRAS, MET, EGFR, IGF1R	123	79	8205	10.1328	4.81696e-06	2.2938e-07	1.16061e-07
KEGG_PATHWAY	hsa04062:Chemokine signaling pathway	17	12.1429	0.026389	GSK3B, MAP2K1, ROCK2, STAT1, SRC, PIK3CD, PIK3CB, PIK3CG, PTK2, CDC42, IKBKB, GRK2, CCL5, RAC1, JAK2, HRAS, JAK3	123	192	8205	5.90638	5.08827e-06	2.31286e-07	1.17025e-07
KEGG_PATHWAY	hsa05163:Human cytomegalovirus infection	18	12.8571	0.0263312	GSK3B, MAP2K1, ROCK2, SRC, TAP1, PIK3CD, PIK3CB, PTGS2, MAPK14, EGFR, PTK2, IKBKB, CDK6, CDK4, CASP3, CCL5, RAC1, HRAS	123	225	8205	5.33659	7.68633e-06	3.3419e-07	1.69092e-07
KEGG_PATHWAY	hsa04625:C-type lectin receptor signaling pathway	13	9.28571	0.0230509	STAT1, SRC, PIK3CD, PTPN11, PIK3CB, PTGS2, MAPK14, IL2, MAPK10, IKBKB, MAPKAPK2, CASP1, HRAS	123	104	8205	8.33841	9.2574e-06	3.85727e-07	1.95169e-07
KEGG_PATHWAY	hsa04917:Prolactin signaling pathway	11	7.85714	0.0191506	MAPK10, GSK3B, MAP2K1, STAT1, SRC, PIK3CD, PIK3CB, JAK2, MAPK14, HRAS, ESR1	123	70	8205	10.4826	1.71006e-05	6.8403e-07	3.46103e-07
KEGG_PATHWAY	hsa05207:Chemical carcinogenesis - receptor activation	17	12.1429	0.0185333	GSTM2, MAP2K1, HSP90AA1, GSTM1, HSP90AB1, SRC, VDR, XIAP, PIK3CD, PIK3CB, ADRB2, ESR1, EGFR, AR, PGR, JAK2, HRAS	123	212	8205	5.34917	2.06221e-05	7.9267e-07	4.01072e-07
KEGG_PATHWAY	hsa04668:TNF signaling pathway	13	9.28571	0.0184047	MAP2K1, MMP3, PIK3CD, PIK3CB, PTGS2, MAPK14, SELE, ICAM1, MAPK10, IKBKB, CASP7, CASP3, CCL5	123	112	8205	7.74281	2.14019e-05	7.9267e-07	4.01072e-07
KEGG_PATHWAY	hsa05218:Melanoma	11	7.85714	0.0177515	MAP2K1, CDK6, CDK4, PIK3CD, IGF1, PIK3CB, HRAS, MET, EGFR, FGFR1, IGF1R	123	72	8205	10.1914	2.25435e-05	8.05132e-07	4.07378e-07
KEGG_PATHWAY	hsa05222:Small cell lung cancer	12	8.57143	0.0172536	IKBKB, CDK6, NOS2, CDK4, CASP3, CDK2, RARB, XIAP, PIK3CD, PIK3CB, PTGS2, PTK2	123	92	8205	8.70095	2.43501e-05	8.3967e-07	4.24853e-07
KEGG_PATHWAY	hsa04915:Estrogen signaling pathway	14	10	0.016865	HSPA8, MAP2K1, HSP90AA1, HSP90AB1, NOS3, SRC, MMP2, PIK3CD, PIK3CB, ESR1, EGFR, RARA, PGR, HRAS	123	138	8205	6.76741	2.81778e-05	9.39274e-07	4.7525e-07
KEGG_PATHWAY	hsa04657:IL-17 signaling pathway	12	8.57143	0.0126515	MAPK10, IKBKB, GSK3B, HSP90AA1, MMP13, HSP90AB1, CASP3, MMP3, LCN2, MAPK14, PTGS2, S100A9	123	94	8205	8.51583	3.05035e-05	9.84e-07	4.97881e-07
KEGG_PATHWAY	hsa05208:Chemical carcinogenesis - reactive oxygen species	17	12.1429	0.0120838	GSTM2, MAP2K1, GSTM1, SRC, PIK3CD, PTPN11, PIK3CB, MAPK14, SOD2, EGFR, PTK2, MAPK10, IKBKB, HMOX1, RAC1, HRAS, MET	123	223	8205	5.08531	4.16131e-05	1.23887e-06	6.2684e-07
KEGG_PATHWAY	hsa05225:Hepatocellular carcinoma	15	10.7143	0.0116199	GSK3B, GSTM2, MAP2K1, GSTM1, GSTP1, PIK3CD, PIK3CB, EGFR, TGFBR1, IGF1R, CDK6, CDK4, HMOX1, HRAS, MET	123	168	8205	5.95601	4.17195e-05	1.23887e-06	6.2684e-07
KEGG_PATHWAY	hsa04722:Neurotrophin signaling pathway	13	9.28571	0.011574	NTRK1, GSK3B, MAP2K1, PIK3CD, PTPN11, PIK3CB, MAPK14, MAPK10, CDC42, IKBKB, MAPKAPK2, RAC1, HRAS	123	119	8205	7.28735	4.21208e-05	1.23887e-06	6.2684e-07
KEGG_PATHWAY	hsa05224:Breast cancer	14	10	0.0084894	GSK3B, MAP2K1, PIK3CD, PIK3CB, IGF1, ESR1, EGFR, IGF1R, CDK6, CDK4, KIT, PGR, HRAS, FGFR1	123	147	8205	6.35308	5.93897e-05	1.6969e-06	8.5859e-07
KEGG_PATHWAY	hsa04380:Osteoclast differentiation	13	9.28571	0.00725938	CSF1R, MAP2K1, STAT1, PIK3CD, PIK3CB, MAPK14, TGFBR1, MAPK10, IKBKB, LCK, CTSK, PPARG, RAC1	123	128	8205	6.77496	9.41026e-05	2.61408e-06	1.32266e-06
KEGG_PATHWAY	hsa04926:Relaxin signaling pathway	13	9.28571	0.00601419	MAP2K1, NOS2, NOS3, SRC, MMP2, PIK3CD, PIK3CB, MAPK14, EGFR, TGFBR1, MAPK10, MMP13, HRAS	123	129	8205	6.72244	0.000102463	2.76942e-06	1.40126e-06
KEGG_PATHWAY	hsa04068:FoxO signaling pathway	13	9.28571	0.00533409	MAP2K1, PIK3CD, PIK3CB, IGF1, MAPK14, SOD2, EGFR, TGFBR1, IGF1R, MAPK10, IKBKB, CDK2, HRAS	123	131	8205	6.61981	0.000121194	3.1895e-06	1.61381e-06
KEGG_PATHWAY	hsa04210:Apoptosis	13	9.28571	0.00527947	NTRK1, MAP2K1, PRF1, XIAP, PIK3CD, PIK3CB, CTSS, MAPK10, IKBKB, CASP7, CASP3, CTSK, HRAS	123	136	8205	6.37643	0.000181987	4.585e-06	2.3199e-06
KEGG_PATHWAY	hsa05161:Hepatitis B	14	10	0.00486318	MAP2K1, STAT1, SRC, PIK3CD, PIK3CB, MAPK14, TGFBR1, MAPK10, IKBKB, CASP3, CDK2, JAK2, HRAS, JAK3	123	162	8205	5.76483	0.000183383	4.585e-06	2.3199e-06
KEGG_PATHWAY	hsa05162:Measles	13	9.28571	0.00443059	HSPA8, GSK3B, STAT1, PIK3CD, PIK3CB, IL2, MAPK10, IKBKB, CDK6, CDK4, CASP3, CDK2, JAK3	123	139	8205	6.23881	0.000230278	5.61719e-06	2.84216e-06
KEGG_PATHWAY	hsa05223:Non-small cell lung cancer	10	7.14286	0.00422434	MAP2K1, CDK6, CDK4, RARB, PIK3CD, PIK3CB, HRAS, JAK3, MET, EGFR	123	72	8205	9.26491	0.0002567	6.11268e-06	3.09287e-06
KEGG_PATHWAY	hsa04914:Progesterone-mediated oocyte maturation	11	7.85714	0.00330272	MAPK10, MAP2K1, HSP90AA1, HSP90AB1, CDK2, PIK3CD, PGR, IGF1, PIK3CB, MAPK14, IGF1R	123	102	8205	7.19393	0.000615307	1.43138e-05	7.24246e-06
KEGG_PATHWAY	hsa05132:Salmonella infection	16	11.4286	0.0032971	MAP2K1, HSP90AA1, HSP90AB1, ROCK2, PIK3CD, PIK3CB, MAPK14, PIK3CG, MAPK10, CDC42, IKBKB, CASP7, CASP3, CASP1, RAC1, HRAS	123	249	8205	4.28641	0.000951035	2.16247e-05	1.09416e-05
KEGG_PATHWAY	hsa05210:Colorectal cancer	10	7.14286	0.00323591	MAPK10, GSK3B, MAP2K1, CASP3, PIK3CD, RAC1, PIK3CB, HRAS, EGFR, TGFBR1	123	86	8205	7.75666	0.00116434	2.58892e-05	1.30993e-05
KEGG_PATHWAY	hsa04658:Th1 and Th2 cell differentiation	10	7.14286	0.00247928	MAPK10, IKBKB, ZAP70, STAT1, LCK, PRKCQ, JAK2, MAPK14, JAK3, IL2	123	92	8205	7.2508	0.00204034	4.42725e-05	2.24008e-05
KEGG_PATHWAY	hsa05230:Central carbon metabolism in cancer	9	6.42857	0.0022635	NTRK1, MAP2K1, KIT, PIK3CD, PIK3CB, HRAS, MET, EGFR, FGFR1	123	70	8205	8.57666	0.00207865	4.42725e-05	2.24008e-05
KEGG_PATHWAY	hsa05169:Epstein-Barr virus infection	14	10	0.0021068	STAT1, TAP1, PIK3CD, PIK3CB, MAPK14, ICAM1, MAPK10, IKBKB, CDK6, CDK4, CASP3, CDK2, RAC1, JAK3	123	202	8205	4.62328	0.00216191	4.50883e-05	2.28136e-05
KEGG_PATHWAY	hsa04935:Growth hormone synthesis, secretion and action	11	7.85714	0.00203136	MAPK10, GSK3B, MAP2K1, STAT1, PIK3CD, IGF1, PIK3CB, JAK2, MAPK14, HRAS, PTK2	123	120	8205	6.11484	0.00267473	5.46592e-05	2.76562e-05
KEGG_PATHWAY	hsa05214:Glioma	9	6.42857	0.00202975	MAP2K1, CDK6, CDK4, PIK3CD, IGF1, PIK3CB, HRAS, EGFR, IGF1R	123	75	8205	8.00488	0.00348917	6.9905e-05	3.53703e-05
KEGG_PATHWAY	hsa05220:Chronic myeloid leukemia	9	6.42857	0.00163487	IKBKB, MAP2K1, CDK6, CDK4, PIK3CD, PTPN11, PIK3CB, HRAS, TGFBR1	123	76	8205	7.89955	0.00385095	7.56541e-05	3.82792e-05
KEGG_PATHWAY	hsa05131:Shigellosis	15	10.7143	0.00163487	GSK3B, ROCK2, SRC, PIK3CD, PIK3CB, MAPK14, EGFR, PTK2, MAPK10, CDC42, IKBKB, CCL5, CASP1, PRKCQ, RAC1	123	247	8205	4.05105	0.00410058	7.78222e-05	3.93762e-05
KEGG_PATHWAY	hsa04650:Natural killer cell mediated cytotoxicity	11	7.85714	0.00162481	ZAP70, MAP2K1, LCK, CASP3, PRF1, PIK3CD, PTPN11, RAC1, PIK3CB, HRAS, ICAM1	123	126	8205	5.82365	0.00411611	7.78222e-05	3.93762e-05
KEGG_PATHWAY	hsa04932:Non-alcoholic fatty liver disease	12	8.57143	0.00157802	MAPK10, CDC42, IKBKB, GSK3B, XBP1, CASP7, CASP3, PIK3CD, PPARG, RAC1, PIK3CB, MAPK14	123	155	8205	5.16444	0.00444151	8.24327e-05	4.1709e-05
KEGG_PATHWAY	hsa00980:Metabolism of xenobiotics by cytochrome P450	9	6.42857	0.00133157	HSD11B1, CYP2C9, GSTM2, GSTM1, CYP2D6, GSTP1, SULT2A1	123	78	8205	7.697	0.00466949	8.50978e-05	4.30575e-05
KEGG_PATHWAY	hsa05160:Hepatitis C	12	8.57143	0.00118857	IKBKB, GSK3B, MAP2K1, CDK6, STAT1, CDK4, CASP3, CDK2, PIK3CD, PIK3CB, HRAS, EGFR	123	157	8205	5.09865	0.00501004	8.96889e-05	4.53804e-05
KEGG_PATHWAY	hsa04620:Toll-like receptor signaling pathway	10	7.14286	0.000957563	MAPK10, IKBKB, MAP2K1, STAT1, CCL5, CTSK, PIK3CD, RAC1, PIK3CB, MAPK14	123	104	8205	6.41417	0.00554727	9.75905e-05	4.93784e-05
KEGG_PATHWAY	hsa05166:Human T-cell leukemia virus 1 infection	14	10	0.000721481	MAP2K1, XIAP, PIK3CD, PIK3CB, TGFBR1, IL2, ICAM1, MAPK10, IKBKB, CDK4, LCK, CDK2, HRAS, JAK3	123	222	8205	4.20677	0.00594278	0.000102766	5.19973e-05
KEGG_PATHWAY	hsa04066:HIF-1 signaling pathway	10	7.14286	0.000670216	MAP2K1, NOS2, NOS3, HMOX1, PIK3CD, TEK, IGF1, PIK3CB, EGFR, IGF1R	123	109	8205	6.11994	0.00807837	0.000137475	6.95592e-05
KEGG_PATHWAY	hsa04012:ErbB signaling pathway	9	6.42857	0.000646278	MAPK10, GSK3B, MAP2K1, SRC, PIK3CD, PIK3CB, HRAS, PTK2, EGFR	123	85	8205	7.06313	0.00877028	0.000146813	7.42841e-05
KEGG_PATHWAY	hsa05145:Toxoplasmosis	10	7.14286	0.000533191	MAPK10, IKBKB, HSPA8, NOS2, STAT1, CASP3, XIAP, JAK2, MAPK14, PIK3CG	123	112	8205	5.95601	0.0100198	0.000165085	8.35289e-05
KEGG_PATHWAY	hsa05164:Influenza A	12	8.57143	0.000444895	IKBKB, MAP2K1, CDK6, STAT1, CDK4, CCL5, CASP3, CASP1, PIK3CD, PIK3CB, JAK2, ICAM1	123	171	8205	4.68122	0.011054	0.000179279	9.07107e-05
KEGG_PATHWAY	hsa04670:Leukocyte transendothelial migration	10	7.14286	0.000379068	CDC42, ROCK2, MMP2, PIK3CD, PTPN11, RAC1, PIK3CB, MAPK14, PTK2, ICAM1	123	114	8205	5.85152	0.0115209	0.000183928	9.30633e-05
KEGG_PATHWAY	hsa04550:Signaling pathways regulating pluripotency of stem cells	11	7.85714	0.000362259	GSK3B, MAP2K1, PIK3CD, IGF1, PIK3CB, JAK2, MAPK14, HRAS, JAK3, FGFR1, IGF1R	123	143	8205	5.13133	0.012289	0.000191013	9.66481e-05
KEGG_PATHWAY	hsa04726:Serotonergic synapse	10	7.14286	0.000359414	CYP2C9, MAP2K1, CYP2D6, CASP3, HTR3A, PTGS2, HRAS, PTGS1	123	115	8205	5.80064	0.0123394	0.000191013	9.66481e-05
KEGG_PATHWAY	hsa05221:Acute myeloid leukemia	8	5.71429	0.000326902	IKBKB, CSF1R, MAP2K1, KIT, RARA, PIK3CD, PIK3CB, HRAS	123	67	8205	7.96505	0.0139979	0.000213581	0.000108067
KEGG_PATHWAY	hsa04664:Fc epsilon RI signaling pathway	8	5.71429	0.000297548	MAPK10, MAP2K1, ALOX5AP, PIK3CD, RAC1, PIK3CB, MAPK14, HRAS	123	68	8205	7.84792	0.0154029	0.000231676	0.000117223
KEGG_PATHWAY	hsa04071:Sphingolipid signaling pathway	10	7.14286	0.000215484	MAPK10, MAP2K1, ROCK2, NOS3, ADORA3, PIK3CD, RAC1, PIK3CB, MAPK14, HRAS	123	119	8205	5.60566	0.0161176	0.000238947	0.000120901
KEGG_PATHWAY	hsa05211:Renal cell carcinoma	8	5.71429	0.000206431	CDC42, MAP2K1, PIK3CD, PTPN11, RAC1, PIK3CB, HRAS, MET	123	69	8205	7.73418	0.01692	0.000247307	0.000125131
KEGG_PATHWAY	hsa04520:Adherens junction	8	5.71429	0.000193158	CDC42, SRC, RAC1, MET, EGFR, TGFBR1, FGFR1, IGF1R	123	71	8205	7.51632	0.0203158	0.000293202	0.000148353
KEGG_PATHWAY	hsa04611:Platelet activation	10	7.14286	0.000158608	PPP1CC, ROCK2, SRC, NOS3, PIK3CD, PIK3CB, F2, MAPK14, PIK3CG, PTGS1	123	124	8205	5.37962	0.0221511	0.000315481	0.000159626
KEGG_PATHWAY	hsa04750:Inflammatory mediator regulation of TRP channels	9	6.42857	0.000144481	NTRK1, MAPK10, PPP1CC, SRC, PIK3CD, PRKCQ, IGF1, PIK3CB, MAPK14	123	98	8205	6.12618	0.0242278	0.000340623	0.000172347
KEGG_PATHWAY	hsa04218:Cellular senescence	11	7.85714	0.00012959	PPP1CC, MAP2K1, CDK6, CDK4, CDK2, MAPKAPK2, PIK3CD, PIK3CB, MAPK14, HRAS, TGFBR1	123	156	8205	4.70372	0.0254638	0.000353319	0.000178771
KEGG_PATHWAY	hsa05142:Chagas disease	9	6.42857	0.000102758	MAPK10, IKBKB, NOS2, CCL5, PIK3CD, PIK3CB, MAPK14, TGFBR1, IL2	123	102	8205	5.88594	0.0320058	0.000439555	0.000222404
KEGG_PATHWAY	hsa04810:Regulation of actin cytoskeleton	13	9.28571	9.77087e-05	MAP2K1, ROCK2, SRC, PIK3CD, PIK3CB, F2, EGFR, PTK2, CDC42, PPP1CC, RAC1, HRAS, FGFR1	123	229	8205	3.78688	0.0356177	0.000483531	0.000244655
KEGG_PATHWAY	hsa05130:Pathogenic Escherichia coli infection	12	8.57143	8.92397e-05	MAPK10, CDC42, IKBKB, CASP7, ROCK2, SRC, CASP3, CASP1, PTPN11, RAC1, F2, MAPK14	123	197	8205	4.06339	0.0390315	0.000523823	0.000265042
KEGG_PATHWAY	hsa04931:Insulin resistance	9	6.42857	8.17695e-05	MAPK10, IKBKB, GSK3B, PPP1CC, NOS3, PIK3CD, PRKCQ, PTPN11, PIK3CB	123	108	8205	5.55894	0.0473306	0.000629645	0.000318585
KEGG_PATHWAY	hsa05415:Diabetic cardiomyopathy	12	8.57143	6.79847e-05	MAPK10, GSK3B, PPP1CC, NOS3, MMP2, GSR, PIK3CD, REN, RAC1, PIK3CB, MAPK14, TGFBR1	123	203	8205	3.94329	0.0504998	0.000664284	0.000336112
KEGG_PATHWAY	hsa05203:Viral carcinogenesis	12	8.57143	6.47346e-05	CDC42, CDK6, SRC, CDK4, CASP3, CDK2, MAPKAPK2, PIK3CD, RAC1, PIK3CB, HRAS, JAK3	123	204	8205	3.92396	0.0526555	0.00068464	0.000346412
KEGG_PATHWAY	hsa04213:Longevity regulating pathway - multiple species	7	5	6.18419e-05	HSPA8, PIK3CD, IGF1, PIK3CB, SOD2, HRAS, IGF1R	123	62	8205	7.53147	0.0719741	0.000933556	0.000472357
KEGG_PATHWAY	hsa05219:Bladder cancer	6	4.28571	5.61608e-05	MAP2K1, SRC, CDK4, MMP2, HRAS, EGFR	123	41	8205	9.76205	0.0787887	0.00101299	0.00051255
KEGG_PATHWAY	hsa05226:Gastric cancer	10	7.14286	4.94656e-05	GSK3B, MAP2K1, CDK2, RARB, PIK3CD, PIK3CB, HRAS, MET, EGFR, TGFBR1	123	149	8205	4.477	0.0862781	0.00109551	0.0005543
KEGG_PATHWAY	hsa04360:Axon guidance	11	7.85714	4.92623e-05	CDC42, GSK3B, ROCK2, SRC, PIK3CD, PTPN11, RAC1, PIK3CB, HRAS, MET, PTK2	123	182	8205	4.03176	0.0869307	0.00109551	0.0005543
KEGG_PATHWAY	hsa05165:Human papillomavirus infection	15	10.7143	4.61652e-05	GSK3B, MAP2K1, STAT1, PIK3CD, PIK3CB, PTGS2, EGFR, PTK2, CDC42, IKBKB, CDK6, CDK4, CASP3, CDK2, HRAS	123	331	8205	3.02299	0.0907763	0.00113269	0.000573115
KEGG_PATHWAY	hsa04912:GnRH signaling pathway	8	5.71429	4.4284e-05	MAPK10, CDC42, MAP2K1, SRC, MMP2, MAPK14, HRAS, EGFR	123	93	8205	5.73826	0.105682	0.00131375	0.000664726
KEGG_PATHWAY	hsa05204:Chemical carcinogenesis - DNA adducts	7	5	4.01202e-05	HSD11B1, CYP2C9, GSTM2, GSTM1, GSTP1, PTGS2, SULT2A1	123	69	8205	6.76741	0.125293	0.00155617	0.000787387
KEGG_PATHWAY	hsa05171:Coronavirus disease - COVID-19	12	8.57143	3.50949e-05	MAPK10, IKBKB, ADAM17, STAT1, MMP3, CASP1, PIK3CD, PIK3CB, F2, MAPK14, EGFR, IL2	123	232	8205	3.45038	0.149787	0.00186455	0.000943418
KEGG_PATHWAY	hsa00982:Drug metabolism - cytochrome P450	7	5	3.23149e-05	CYP2C9, GSTM2, GSTM1, CYP2D6, GSTP1	123	72	8205	6.48543	0.154883	0.00191164	0.000967244
KEGG_PATHWAY	hsa01524:Platinum drug resistance	7	5	2.37468e-05	GSTM2, GSTM1, CASP3, GSTP1, XIAP, PIK3CD, PIK3CB	123	73	8205	6.39659	0.165696	0.00203474	0.00102953
KEGG_PATHWAY	hsa05100:Bacterial invasion of epithelial cells	7	5	2.2162e-05	CDC42, SRC, PIK3CD, RAC1, PIK3CB, MET, PTK2	123	77	8205	6.0643	0.213737	0.00267054	0.00135123
KEGG_PATHWAY	hsa05170:Human immunodeficiency virus 1 infection	11	7.85714	2.00103e-05	MAPK10, IKBKB, MAP2K1, CASP3, TAP1, PIK3CD, RAC1, PIK3CB, MAPK14, HRAS, PTK2	123	212	8205	3.46123	0.258076	0.00327837	0.00165878
KEGG_PATHWAY	hsa04662:B cell receptor signaling pathway	7	5	1.86469e-05	IKBKB, GSK3B, MAP2K1, PIK3CD, RAC1, PIK3CB, HRAS	123	82	8205	5.69453	0.284267	0.00363288	0.00183815
KEGG_PATHWAY	hsa04072:Phospholipase D signaling pathway	9	6.42857	1.77345e-05	MAP2K1, KIT, PIK3CD, PTPN11, PIK3CB, F2, HRAS, EGFR, PIK3CG	123	148	8205	4.05653	0.327259	0.00425895	0.00215493
KEGG_PATHWAY	hsa04024:cAMP signaling pathway	11	7.85714	1.64326e-05	MAPK10, PPP1CC, MAP2K1, ADORA2A, ROCK2, PDE4D, PDE4B, PIK3CD, RAC1, ADRB2, PIK3CB	123	221	8205	3.32027	0.335126	0.0042745	0.0021628
KEGG_PATHWAY	hsa05213:Endometrial cancer	6	4.28571	1.63704e-05	GSK3B, MAP2K1, PIK3CD, PIK3CB, HRAS, EGFR	123	58	8205	6.90076	0.336806	0.0042745	0.0021628
KEGG_PATHWAY	hsa04923:Regulation of lipolysis in adipocytes	6	4.28571	1.53719e-05	FABP4, PIK3CD, ADRB2, PIK3CB, PTGS2, PTGS1	123	58	8205	6.90076	0.336806	0.0042745	0.0021628
KEGG_PATHWAY	hsa04921:Oxytocin signaling pathway	9	6.42857	1.39253e-05	PPP1CC, MAP2K1, ROCK2, SRC, NOS3, PTGS2, HRAS, EGFR, PIK3CG	123	154	8205	3.89848	0.399495	0.00520277	0.00263248
KEGG_PATHWAY	hsa04211:Longevity regulating pathway	7	5	1.06705e-05	PIK3CD, PPARG, IGF1, PIK3CB, SOD2, HRAS, IGF1R	123	89	8205	5.24664	0.399739	0.00520277	0.00263248
KEGG_PATHWAY	hsa04919:Thyroid hormone signaling pathway	8	5.71429	8.62247e-06	GSK3B, MAP2K1, STAT1, SRC, PIK3CD, PIK3CB, HRAS, ESR1	123	121	8205	4.4104	0.411021	0.00534148	0.00270266
KEGG_PATHWAY	hsa05202:Transcriptional misregulation in cancer	10	7.14286	8.29008e-06	NTRK1, CSF1R, MMP3, RARA, PPARG, IGF1, MET, PTK2, ELANE, IGF1R	123	193	8205	3.45634	0.433786	0.00568139	0.00287465
KEGG_PATHWAY	hsa04217:Necroptosis	9	6.42857	8.13713e-06	MAPK10, HSP90AA1, HSP90AB1, STAT1, CASP1, XIAP, JAK2, PPIA, JAK3	123	159	8205	3.77589	0.463706	0.00616138	0.00311751
KEGG_PATHWAY	hsa04630:JAK-STAT signaling pathway	9	6.42857	4.6415e-06	STAT1, PIK3CD, PTPN11, PIK3CB, JAK2, HRAS, JAK3, EGFR, IL2	123	166	8205	3.61666	0.55671	0.00796289	0.00402903
KEGG_PATHWAY	hsa04114:Oocyte meiosis	8	5.71429	3.79078e-06	PPP1CC, AR, MAP2K1, CDK2, PGR, IGF1, MAPK14, IGF1R	123	131	8205	4.07373	0.563488	0.00797099	0.00403313
KEGG_PATHWAY	hsa05231:Choline metabolism in cancer	7	5	2.45217e-06	MAPK10, MAP2K1, PIK3CD, RAC1, PIK3CB, HRAS, EGFR	123	98	8205	4.76481	0.564105	0.00797099	0.00403313
KEGG_PATHWAY	hsa04910:Insulin signaling pathway	8	5.71429	1.02284e-06	MAPK10, IKBKB, GSK3B, PPP1CC, MAP2K1, PIK3CD, PIK3CB, HRAS	123	137	8205	3.89532	0.654428	0.0100982	0.00510944
KEGG_PATHWAY	hsa04064:NF-kappa B signaling pathway	7	5	9.17548e-07	IKBKB, ZAP70, LCK, XIAP, PRKCQ, PTGS2, ICAM1	123	104	8205	4.48992	0.671937	0.0104913	0.00530835
KEGG_PATHWAY	hsa04928:Parathyroid hormone synthesis, secretion and action	7	5	7.30677e-07	MAP2K1, MMP13, VDR, PDE4D, PDE4B, EGFR, FGFR1	123	106	8205	4.4052	0.705841	0.011408	0.00577218
KEGG_PATHWAY	hsa05152:Tuberculosis	9	6.42857	7.25114e-07	MAPK10, NOS2, STAT1, SRC, VDR, CASP3, JAK2, MAPK14, CTSS	123	180	8205	3.33537	0.735168	0.0122699	0.00620827
KEGG_PATHWAY	hsa05133:Pertussis	6	4.28571	4.82873e-07	MAPK10, CASP7, NOS2, CASP3, CASP1, MAPK14	123	76	8205	5.26637	0.738793	0.0122831	0.00621495
KEGG_PATHWAY	hsa04621:NOD-like receptor signaling pathway	9	6.42857	4.08242e-07	MAPK10, IKBKB, HSP90AA1, HSP90AB1, STAT1, CCL5, CASP1, XIAP, MAPK14	123	184	8205	3.26286	0.779998	0.0137233	0.00694365
KEGG_PATHWAY	hsa04613:Neutrophil extracellular trap formation	9	6.42857	3.74928e-07	MAP2K1, SRC, CASP1, PIK3CD, CTSG, RAC1, PIK3CB, MAPK14, ELANE	123	190	8205	3.15982	0.839386	0.0164154	0.00830578
KEGG_PATHWAY	hsa04150:mTOR signaling pathway	8	5.71429	2.36619e-07	IKBKB, GSK3B, MAP2K1, PIK3CD, IGF1, PIK3CB, HRAS, IGF1R	123	156	8205	3.42089	0.882338	0.0190253	0.00962637
KEGG_PATHWAY	hsa05010:Alzheimer disease	13	9.28571	1.67816e-07	GSK3B, MAP2K1, XBP1, NOS2, PIK3CD, PIK3CB, PTGS2, MAPK10, IKBKB, CASP7, ADAM17, CASP3, HRAS	123	384	8205	2.25832	0.946174	0.0255843	0.012945
KEGG_PATHWAY	hsa04215:Apoptosis - multiple species	4	2.85714	1.66216e-07	MAPK10, CASP7, CASP3, XIAP	123	32	8205	8.33841	0.946799	0.0255843	0.012945
KEGG_PATHWAY	hsa04022:cGMP-PKG signaling pathway	8	5.71429	1.65793e-07	PPP1CC, MAP2K1, ROCK2, NOS3, ADORA3, ADRB2, ADRA2B, PIK3CG	123	167	8205	3.19556	0.952713	0.0263743	0.0133447
KEGG_PATHWAY	hsa00590:Arachidonic acid metabolism	5	3.57143	1.2153e-07	CYP2C9, PLA2G2A, PTGS2, PTGES, PTGS1	123	61	8205	5.46781	0.959066	0.0273753	0.0138513
KEGG_PATHWAY	hsa05206:MicroRNAs in cancer	11	7.85714	1.12264e-07	IKBKB, MAP2K1, CDK6, CASP3, HMOX1, PIK3CD, PIK3CB, PTGS2, HRAS, MET, EGFR	123	310	8205	2.36703	0.986007	0.0361805	0.0183065
KEGG_PATHWAY	hsa05216:Thyroid cancer	4	2.85714	9.70137e-08	NTRK1, MAP2K1, PPARG, HRAS	123	37	8205	7.2116	0.987329	0.0367005	0.0185696
KEGG_PATHWAY	hsa05146:Amoebiasis	6	4.28571	8.98156e-08	NOS2, CASP3, PIK3CD, CTSG, PIK3CB, PTK2	123	102	8205	3.92396	0.988843	0.0374422	0.0189449
KEGG_PATHWAY	hsa04140:Autophagy - animal	7	5	8.52673e-08	MAPK10, MAP2K1, PIK3CD, PRKCQ, PIK3CB, HRAS, IGF1R	123	141	8205	3.31171	0.990558	0.0384451	0.0194523
KEGG_PATHWAY	hsa05340:Primary immunodeficiency	4	2.85714	8.21606e-08	ZAP70, LCK, TAP1, JAK3	123	38	8205	7.02182	0.990864	0.0384451	0.0194523
KEGG_PATHWAY	hsa04920:Adipocytokine signaling pathway	5	3.57143	6.81305e-08	MAPK10, IKBKB, PRKCQ, PTPN11, JAK2	123	69	8205	4.83386	0.992198	0.0394001	0.0199355
KEGG_PATHWAY	hsa04115:p53 signaling pathway	5	3.57143	3.68822e-08	CDK6, CDK4, CASP3, CDK2, IGF1	123	73	8205	4.56899	0.99713	0.0470389	0.0238005
KEGG_PATHWAY	hsa04725:Cholinergic synapse	6	4.28571	3.0623e-08	MAP2K1, PIK3CD, PIK3CB, JAK2, HRAS, PIK3CG	123	113	8205	3.54198	0.998766	0.0529891	0.0268112
KEGG_PATHWAY	hsa04020:Calcium signaling pathway	9	6.42857	2.0272e-08	NTRK1, ADORA2A, NOS2, NOS3, KDR, ADRB2, MET, EGFR, FGFR1	123	240	8205	2.50152	0.998785	0.0529891	0.0268112
KEGG_PATHWAY	hsa05140:Leishmaniasis	5	3.57143	1.91911e-08	NOS2, STAT1, JAK2, MAPK14, PTGS2	123	77	8205	4.33164	0.999064	0.0545867	0.0276196
KEGG_PATHWAY	hsa04612:Antigen processing and presentation	5	3.57143	1.26275e-08	HSPA8, HSP90AA1, HSP90AB1, TAP1, CTSS	123	78	8205	4.27611	0.999306	0.0564482	0.0285614
KEGG_PATHWAY	hsa04930:Type II diabetes mellitus	4	2.85714	6.10979e-09	MAPK10, IKBKB, PIK3CD, PIK3CB	123	46	8205	5.80064	0.999593	0.0600529	0.0306246
KEGG_PATHWAY	hsa04152:AMPK signaling pathway	6	4.28571	5.69895e-09	PIK3CD, PPARG, HMGCR, IGF1, PIK3CB, IGF1R	123	121	8205	3.3078	0.99983	0.0661508	0.0339978
KEGG_PATHWAY	hsa00670:One carbon pool by folate	3	2.14286	5.14281e-09	DHFR, MTHFD1, TYMS	123	20	8205	10.0061	0.999869	0.0675567	0.0349895
KEGG_PATHWAY	hsa04913:Ovarian steroidogenesis	4	2.85714	3.55878e-09	IGF1, PTGS2, CYP19A1, IGF1R	123	51	8205	5.23195	0.999963	0.0763417	0.0398437
KEGG_PATHWAY	hsa04270:Vascular smooth muscle contraction	6	4.28571	1.66942e-09	PPP1CC, MAP2K1, ADORA2A, ROCK2, PLA2G2A, PRKCQ	123	134	8205	2.98689	0.999997	0.0933269	0.0491604
KEGG_PATHWAY	hsa05323:Rheumatoid arthritis	5	3.57143	1.53865e-09	CCL5, CTSK, MMP3, TEK, ICAM1	123	93	8205	3.58641	0.999997	0.0933269	0.0494521
KEGG_PATHWAY	hsa05020:Prion disease	9	6.42857	1.36088e-09	MAPK10, HSPA8, GSK3B, CCL5, CASP3, PIK3CD, RAC1, PIK3CB, MAPK14	123	273	8205	2.19914	0.999998	0.0942573	0.0503206
KEGG_PATHWAY	hsa00480:Glutathione metabolism	4	2.85714	7.54599e-10	GSTM2, GSTM1, GSTP1, GSR	123	57	8205	4.68122	0.999999	0.0969775	0.0525456
KEGG_PATHWAY	hsa05134:Legionellosis	4	2.85714	4.21952e-10	HSPA8, CASP7, CASP3, CASP1	123	57	8205	4.68122	0.999999	0.0969775	0.0525456
KEGG_PATHWAY	hsa04371:Apelin signaling pathway	6	4.28571	4.19206e-11	MAP2K1, NOS2, NOS3, HRAS, TGFBR1, PIK3CG	123	139	8205	2.87945	0.999999	0.102102	0.0559047
KEGG_PATHWAY	hsa04666:Fc gamma R-mediated phagocytosis	5	3.57143	2.77347e-11	CDC42, MAP2K1, PIK3CD, RAC1, PIK3CB	123	97	8205	3.43852	0.999999	0.102102	0.0561357
KEGG_PATHWAY	hsa05416:Viral myocarditis	4	2.85714	1.60718e-11	CASP3, PRF1, RAC1, ICAM1	123	60	8205	4.44715	1	0.106753	0.0595435
KEGG_PATHWAY	hsa04730:Long-term depression	4	2.85714	8.90916e-12	MAP2K1, IGF1, HRAS, IGF1R	123	60	8205	4.44715	1	0.106753	0.0595435
KEGG_PATHWAY	hsa04929:GnRH secretion	4	2.85714	1.464e-12	MAP2K1, PIK3CD, PIK3CB, HRAS	123	64	8205	4.16921	1	0.123749	0.0695166
KEGG_PATHWAY	hsa01523:Antifolate resistance	3	2.14286	9.92745e-13	DHFR, IKBKB, TYMS	123	30	8205	6.67073	1	0.128713	0.0728179
KEGG_PATHWAY	hsa04144:Endocytosis	8	5.71429	7.16582e-13	CDC42, HSPA8, GRK2, SRC, HRAS, EGFR, TGFBR1, IGF1R	123	251	8205	2.12613	1	0.140369	0.079971
KEGG_PATHWAY	hsa04934:Cushing syndrome	6	4.28571	1.54256e-13	GSK3B, MAP2K1, CDK6, CDK4, CDK2, EGFR	123	155	8205	2.58222	1	0.141018	0.0809028
KEGG_PATHWAY	hsa05022:Pathways of neurodegeneration - multiple diseases	12	8.57143	3.56893e-18	MAPK10, GSK3B, MAP2K1, XBP1, CASP7, NOS2, CASP3, LRRK2, RAC1, MAPK14, PTGS2, HRAS	123	476	8205	1.6817	1	0.166341	0.0960932
KEGG_PATHWAY	hsa01100:Metabolic pathways	30	21.4286	2.72889e-24	GPI, GSTP1, AKR1B1, PIK3CD, HMGCR, PIK3CB, TYMS, PTGS2, CYP19A1, ABO, PIK3CG, PTGS1, HSD11B1, STS, CA2, PDE4B, HMOX1, GSTM2, GSTM1, NOS2, NOS3, PDE4D, PLA2G2A, GSR, DHODH, DHFR, CYP2C9, MTHFD1, HPRT1, PTGES	123	1541	8205	1.29865	1	0.169096	0.0983586
GOTERM_BP_DIRECT	GO:0007165~signal transduction	43	30.7143	3.87924e-18	GPI, CSF1R, GSK3B, CRABP2, SRC, LRRK2, NR1I2, PIK3CD, PIK3CB, NR3C1, EGFR, IGF1R, GRK2, TTR, ADORA3, CASP1, PDE4B, JAK2, HRAS, MAP2K1, STAT1, PDE4D, ANXA5, HTR3A, IGF1, MAPK14, ESR1, TGFBR1, PGF, MAPK10, AR, RAP2A, CDK6, CDK4, KIT, CDK2, RARA, RARB, PPARG, PGR, TEK, MET, PTGES	137	1259	19357	4.8257	8.33648e-15	8.33648e-15	7.76623e-15
GOTERM_BP_DIRECT	GO:0043410~positive regulation of MAPK cascade	19	13.5714	7.72694e-17	NTRK1, MAP2K1, ROCK2, IGF1, ADRB2, MMP8, ADRA2B, TGFBR1, IGF1R, CDC42, AR, BMP2, KIT, KDR, TEK, JAK2, HRAS, PPIA, FGFR1	137	162	19357	16.5713	2.38587e-13	8.30259e-14	7.73466e-14
GOTERM_BP_DIRECT	GO:0006468~protein phosphorylation	26	18.5714	6.28236e-15	GSK3B, ROCK2, LRRK2, PIK3CD, PIK3CG, IKBKB, CDC42, GRK2, CTSG, JAK2, JAK3, NTRK1, MAP2K1, TGFBR1, PTK2, MAPK10, ZAP70, BMP2, CDK6, LCK, CDK4, MAPKAPK2, CDK2, RARA, PRKCQ, FGFR1	137	489	19357	7.51246	1.35995e-11	4.50026e-12	4.19243e-12
GOTERM_BP_DIRECT	GO:0051897~positive regulation of protein kinase B signaling	16	11.4286	1.73033e-14	XBP1, HSP90AA1, HSP90AB1, SRC, PIK3CD, PIK3CB, IGF1, F3, EGFR, TGFBR1, PIK3CG, PTK2, IGF1R, TEK, MET, FGFR1	137	129	19357	17.5246	3.72196e-11	9.29622e-12	8.66032e-12
GOTERM_BP_DIRECT	GO:0030335~positive regulation of cell migration	20	14.2857	3.01627e-14	CSF1R, XBP1, ROCK2, MMP2, PIK3CD, IGF1, SOD2, F3, EGFR, TGFBR1, PTK2, IGF1R, CDC42, BMP2, ADAM17, CCL5, KIT, KDR, JAK2, HRAS	137	262	19357	10.7856	6.48956e-11	1.29639e-11	1.20771e-11
GOTERM_BP_DIRECT	GO:0001934~positive regulation of protein phosphorylation	18	12.8571	1.44397e-13	NTRK1, CSF1R, XBP1, HSP90AA1, ROCK2, LRRK2, F2, EGFR, PGF, PTK2, BMP2, ADAM17, RAP2A, KDR, TEK, RAC1, HRAS, PPIA	137	212	19357	11.9965	3.10402e-10	5.17181e-11	4.81804e-11
GOTERM_BP_DIRECT	GO:0018108~peptidyl-tyrosine phosphorylation	15	10.7143	1.00454e-12	NTRK1, CSF1R, MAP2K1, SRC, EGFR, PTK2, ZAP70, LCK, KIT, KDR, TEK, JAK2, JAK3, MET, FGFR1	137	139	19357	15.2473	2.15873e-09	3.08394e-10	2.87298e-10
GOTERM_BP_DIRECT	GO:0043066~negative regulation of apoptotic process	24	17.1429	1.73839e-12	NTRK1, GSK3B, CSF1R, XBP1, HSP90AB1, SRC, GSTP1, ANXA5, AKR1B1, XIAP, IGF1, SOD2, EGFR, TGFBR1, IL2, PTK2, IGF1R, IKBKB, CASP3, ALB, KDR, DPEP1, TEK, TGM2	137	520	19357	6.52117	3.73579e-09	4.66976e-10	4.35033e-10
GOTERM_BP_DIRECT	GO:0009410~response to xenobiotic stimulus	18	12.8571	2.39943e-12	NTRK1, BCHE, HSP90AA1, HSP90AB1, STAT1, SRC, MMP2, TYMS, PTGS2, SOD2, PGF, ADAM17, ADORA2A, CDK4, LCK, CASP3, HMOX1, PPARG	137	252	19357	10.0923	5.15634e-09	5.7293e-10	5.33739e-10
GOTERM_BP_DIRECT	GO:0007169~transmembrane receptor protein tyrosine kinase signaling pathway	14	10	9.8939e-12	NTRK1, CSF1R, SRC, PIK3CB, EGFR, PTK2, IGF1R, ZAP70, LCK, KIT, KDR, TEK, MET, FGFR1	137	133	19357	14.8728	2.12619e-08	2.1262e-09	1.98076e-09
GOTERM_BP_DIRECT	GO:0014068~positive regulation of phosphatidylinositol 3-kinase signaling	12	8.57143	1.87394e-11	NTRK1, SRC, CCL5, KIT, KDR, TEK, IGF1, F2, JAK2, PTK2, FGFR1, IGF1R	137	85	19357	19.9471	4.02711e-08	3.661e-09	3.41058e-09
GOTERM_BP_DIRECT	GO:0046777~protein autophosphorylation	15	10.7143	3.19381e-11	NTRK1, GSK3B, CSF1R, SRC, LRRK2, EGFR, PTK2, IGF1R, ZAP70, KIT, MAPKAPK2, KDR, TEK, JAK2, FGFR1	137	179	19357	11.8401	6.8635e-08	5.71958e-09	5.32834e-09
GOTERM_BP_DIRECT	GO:0006954~inflammatory response	20	14.2857	9.5246e-11	CSF1R, NOS2, PLA2G2A, PIK3CD, PTGS2, SELE, PIK3CG, PTGS1, IKBKB, BMP2, ADORA2A, CNR2, ADORA3, CCL5, KIT, MAPKAPK2, DPEP1, PRKCQ, RAC1, S100A9	137	414	19357	6.8257	2.04683e-07	1.57449e-08	1.46679e-08
GOTERM_BP_DIRECT	GO:0032496~response to lipopolysaccharide	13	9.28571	3.54184e-10	NOS2, NOS3, PTGS2, SOD2, SELE, ADAM17, CNR2, CASP3, MAPKAPK2, REN, JAK2, S100A9, ELANE	137	142	19357	12.9352	7.6114e-07	5.43672e-08	5.06483e-08
GOTERM_BP_DIRECT	GO:0006508~proteolysis	19	13.5714	8.5737e-10	MMP2, MMP3, F2, MMP8, F3, CTSS, MMP12, DPP4, CASP7, ADAM17, MMP13, CASP3, CTSK, CASP1, DPEP1, CTSG, REN, ELANE, TGM2	137	418	19357	6.42236	1.84249e-06	1.22833e-07	1.1443e-07
GOTERM_BP_DIRECT	GO:0022617~extracellular matrix disassembly	9	6.42857	1.0055e-09	MMP12, MMP13, MMP2, CTSK, MMP3, CTSG, MMP8, CTSS, ELANE	137	46	19357	27.6441	2.16081e-06	1.35051e-07	1.25813e-07
GOTERM_BP_DIRECT	GO:0008284~positive regulation of cell proliferation	21	15	1.30429e-09	CSF1R, XBP1, IGF1, F2, EGFR, TGFBR1, IL2, PGF, PTK2, IGF1R, DPP4, AR, BMP2, ADAM17, CDK4, KIT, CDK2, KDR, RARA, HRAS, FGFR1	137	541	19357	5.48453	2.80292e-06	1.64878e-07	1.536e-07
GOTERM_BP_DIRECT	GO:0070374~positive regulation of ERK1 and ERK2 cascade	14	10	7.23515e-09	NTRK1, CSF1R, MAP2K1, SRC, PLA2G2A, PTPN11, IGF1, EGFR, ICAM1, BMP2, CCL5, KDR, TEK, HRAS	137	226	19357	8.7526	1.55482e-05	8.63796e-07	8.04709e-07
GOTERM_BP_DIRECT	GO:0010628~positive regulation of gene expression	19	13.5714	2.09814e-08	GSK3B, MAP2K1, ROCK2, NOS3, VDR, NR1I2, PIK3CD, PIK3CB, IGF1, MAPK14, MMP8, F3, TGFBR1, AR, BMP2, CDK6, RARA, PGR, PPARG	137	513	19357	5.23304	4.50881e-05	2.37311e-06	2.21078e-06
GOTERM_BP_DIRECT	GO:0008285~negative regulation of cell proliferation	18	12.8571	2.21764e-08	NTRK1, BCHE, CSF1R, MAP2K1, NOS3, VDR, PTGS2, SOD2, AR, BMP2, CDK6, ADORA2A, ADORA3, RARA, RARB, JAK2, HRAS, PTGES	137	456	19357	5.57731	4.76559e-05	2.38285e-06	2.21986e-06
GOTERM_BP_DIRECT	GO:0007507~heart development	13	9.28571	3.02927e-08	MAP2K1, MMP2, PTPN11, SOD2, TGFBR1, CASP7, BMP2, RBP4, GRK2, MTHFD1, CASP3, PPARG, TEK	137	210	19357	8.74665	6.50969e-05	3.09995e-06	2.8879e-06
GOTERM_BP_DIRECT	GO:0033674~positive regulation of kinase activity	9	6.42857	3.53851e-08	NTRK1, CSF1R, KIT, KDR, TEK, MET, EGFR, FGFR1, IGF1R	137	71	19357	17.9102	7.60398e-05	3.45648e-06	3.22005e-06
GOTERM_BP_DIRECT	GO:0048010~vascular endothelial growth factor receptor signaling pathway	7	5	5.565e-08	XBP1, SRC, MAPKAPK2, KDR, MAPK14, PTK2, PGF	137	30	19357	32.9681	0.000119585	5.19965e-06	4.84397e-06
GOTERM_BP_DIRECT	GO:0098869~cellular oxidant detoxification	9	6.42857	6.08948e-08	GSTM2, GSTP1, ALOX5AP, ALB, GSR, PTGS2, S100A9, PTGES, PTGS1	137	76	19357	16.7319	0.000130854	5.45262e-06	5.07964e-06
GOTERM_BP_DIRECT	GO:0048661~positive regulation of smooth muscle cell proliferation	8	5.71429	1.61398e-07	STAT1, CCL5, MMP2, HMOX1, IGF1, PTGS2, ELANE, IGF1R	137	58	19357	19.4885	0.000346783	1.38737e-05	1.29247e-05
GOTERM_BP_DIRECT	GO:0038083~peptidyl-tyrosine autophosphorylation	6	4.28571	3.80389e-07	NTRK1, SRC, LCK, KDR, EGFR, IGF1R	137	22	19357	38.5342	0.000817121	3.14406e-05	2.92899e-05
GOTERM_BP_DIRECT	GO:0030574~collagen catabolic process	7	5	3.95532e-07	MMP12, MMP13, MMP2, CTSK, MMP3, MMP8, CTSS	137	41	19357	24.123	0.000849637	3.14814e-05	2.93279e-05
GOTERM_BP_DIRECT	GO:0010595~positive regulation of endothelial cell migration	8	5.71429	4.42936e-07	GPI, ROCK2, KDR, PIK3CD, TEK, RAC1, PIK3CB, PIK3CG	137	67	19357	16.8707	0.000951417	3.39953e-05	3.16699e-05
GOTERM_BP_DIRECT	GO:0030168~platelet activation	8	5.71429	4.90893e-07	SRC, LCK, CTSG, PIK3CB, F2, MAPK14, PPIA, ADRA2B	137	68	19357	16.6226	0.00105437	3.63769e-05	3.38886e-05
GOTERM_BP_DIRECT	GO:0035556~intracellular signal transduction	16	11.4286	6.56828e-07	GSK3B, SRC, LRRK2, MAPK14, TGFBR1, MAPK10, ZAP70, CASP7, LCK, KIT, MAPKAPK2, HMOX1, PRKCQ, RAC1, JAK2, JAK3	137	450	19357	5.02371	0.00141053	4.69712e-05	4.37582e-05
GOTERM_BP_DIRECT	GO:0018105~peptidyl-serine phosphorylation	11	7.85714	6.77574e-07	IKBKB, GSK3B, GRK2, ROCK2, SRC, LRRK2, CDK2, MAPKAPK2, PRKCQ, MAPK14, TGFBR1	137	183	19357	8.49296	0.00145505	4.69712e-05	4.37582e-05
GOTERM_BP_DIRECT	GO:0071222~cellular response to lipopolysaccharide	11	7.85714	7.48527e-07	XBP1, NOS2, SRC, CDK4, GSTP1, CASP1, PDE4B, RARA, CTSG, JAK2, MAPK14	137	185	19357	8.40114	0.00160729	5.02683e-05	4.68297e-05
GOTERM_BP_DIRECT	GO:0045429~positive regulation of nitric oxide biosynthetic process	7	5	8.00582e-07	HSP90AA1, HSP90AB1, JAK2, SOD2, MMP8, PTGS2, ESR1	137	46	19357	21.501	0.00171897	5.15891e-05	4.80602e-05
GOTERM_BP_DIRECT	GO:0007275~multicellular organism development	10	7.14286	8.16208e-07	NTRK1, CSF1R, VDR, KIT, KDR, TEK, MET, EGFR, FGFR1, IGF1R	137	144	19357	9.81194	0.00175249	5.15891e-05	4.80602e-05
GOTERM_BP_DIRECT	GO:0048015~phosphatidylinositol-mediated signaling	7	5	9.12473e-07	CSF1R, PIK3CD, IGF1, PIK3CB, PIK3CG, FGFR1, IGF1R	137	47	19357	21.0435	0.00195898	5.60258e-05	5.21934e-05
GOTERM_BP_DIRECT	GO:0043406~positive regulation of MAP kinase activity	8	5.71429	1.15546e-06	SRC, LRRK2, KIT, HRAS, EGFR, ELANE, PIK3CG, FGFR1	137	77	19357	14.6797	0.00248	6.89743e-05	6.42562e-05
GOTERM_BP_DIRECT	GO:0000165~MAPK cascade	10	7.14286	1.51009e-06	PPP1CC, AR, MAP2K1, CCL5, LRRK2, MAPKAPK2, HRAS, ADRA2B, EGFR, FGFR1	137	155	19357	9.11561	0.00323992	8.77075e-05	8.1708e-05
GOTERM_BP_DIRECT	GO:0042127~regulation of cell proliferation	10	7.14286	3.40092e-06	CSF1R, NOS2, STAT1, CDK4, KIT, XIAP, HRAS, PTK2, EGFR, PTGS1	137	171	19357	8.26269	0.00728195	0.000192331	0.000179175
GOTERM_BP_DIRECT	GO:0051770~positive regulation of nitric-oxide synthase biosynthetic process	5	3.57143	6.60855e-06	STAT1, LRRK2, KDR, JAK2, JAK3	137	18	19357	39.2478	0.0141015	0.000364148	0.000339239
GOTERM_BP_DIRECT	GO:0001525~angiogenesis	11	7.85714	9.93491e-06	XBP1, NOS3, MMP2, KDR, HMOX1, TEK, MAPK14, PTGS2, ADRA2B, PTK2, PIK3CG	137	247	19357	6.29235	0.0211239	0.000533753	0.000497242
GOTERM_BP_DIRECT	GO:0042307~positive regulation of protein import into nucleus	6	4.28571	1.09772e-05	XBP1, HSP90AA1, HSP90AB1, JAK2, MAPK14, PTGS2	137	42	19357	20.1846	0.0233141	0.000575366	0.000536009
GOTERM_BP_DIRECT	GO:0043524~negative regulation of neuron apoptotic process	9	6.42857	1.15385e-05	NTRK1, GPI, HSP90AB1, ADORA2A, KDR, HMOX1, JAK2, SOD2, HRAS	137	151	19357	8.42138	0.0244914	0.000590386	0.000550001
GOTERM_BP_DIRECT	GO:0001938~positive regulation of endothelial cell proliferation	7	5	1.45669e-05	BMP2, KDR, PIK3CD, TEK, F3, TGFBR1, PGF	137	75	19357	13.1873	0.0308196	0.00071445	0.000665579
GOTERM_BP_DIRECT	GO:0019221~cytokine-mediated signaling pathway	9	6.42857	1.46281e-05	CSF1R, STAT1, KIT, PTPN11, CTSG, JAK2, JAK3, F3, TGM2	137	156	19357	8.15146	0.0309471	0.00071445	0.000665579
GOTERM_BP_DIRECT	GO:0042178~xenobiotic catabolic process	5	3.57143	1.54569e-05	CYP2C9, GSTM2, GSTM1, CYP2D6, NR1I2	137	22	19357	32.1118	0.0326715	0.000724202	0.000674664
GOTERM_BP_DIRECT	GO:0014065~phosphatidylinositol 3-kinase signaling	6	4.28571	1.55018e-05	XBP1, PIK3CD, IGF1, PIK3CB, PIK3CG, IGF1R	137	45	19357	18.8389	0.0327648	0.000724202	0.000674664
GOTERM_BP_DIRECT	GO:0008217~regulation of blood pressure	7	5	1.69562e-05	NOS3, HMOX1, REN, PPARG, SOD2, PTGS2, PTGS1	137	77	19357	12.8447	0.0357832	0.000775294	0.000722261
GOTERM_BP_DIRECT	GO:0001666~response to hypoxia	9	6.42857	1.75636e-05	DPP4, ADAM17, BMP2, NOS2, CASP3, MMP2, HMOX1, SOD2, PGF	137	160	19357	7.94767	0.037041	0.000786336	0.000732548
GOTERM_BP_DIRECT	GO:0006749~glutathione metabolic process	6	4.28571	1.92448e-05	GSTM2, GSTM1, GSTP1, GSR, DPEP1, SOD2	137	47	19357	18.0373	0.040514	0.000844024	0.000786289
GOTERM_BP_DIRECT	GO:0045766~positive regulation of angiogenesis	9	6.42857	2.10128e-05	NTRK1, XBP1, NOS3, KDR, HMOX1, PIK3CD, TEK, F3, PGF	137	164	19357	7.75383	0.0441527	0.000903132	0.000841354
GOTERM_BP_DIRECT	GO:0006915~apoptotic process	16	11.4286	2.35476e-05	XBP1, PRF1, MAPK14, NR3C1, TGFBR1, CASP7, ADORA2A, CASP3, CASP1, LCN2, DPEP1, RARB, JAK2, MET, PPIA, S100A9	137	605	19357	3.73665	0.0493453	0.000977632	0.000910758
GOTERM_BP_DIRECT	GO:0001837~epithelial to mesenchymal transition	6	4.28571	2.36561e-05	GSK3B, BMP2, ROCK2, IGF1, TGFBR1, FGFR1	137	49	19357	17.3011	0.0495669	0.000977632	0.000910758
GOTERM_BP_DIRECT	GO:0030593~neutrophil chemotaxis	7	5	2.43339e-05	CCL5, PDE4B, DPEP1, PIK3CD, PPIA, S100A9, PIK3CG	137	82	19357	12.0615	0.0509503	0.000986669	0.000919177
GOTERM_BP_DIRECT	GO:0001935~endothelial cell proliferation	5	3.57143	2.62963e-05	XBP1, HMOX1, TEK, PIK3CB, TGFBR1	137	25	19357	28.2584	0.0549444	0.0010465	0.000974912
GOTERM_BP_DIRECT	GO:0007267~cell-cell signaling	10	7.14286	3.6567e-05	AR, BMP2, ADORA2A, CCL5, PGR, TEK, ADRA2B, S100A9, IL2, PGF	137	230	19357	6.14313	0.0755754	0.00142877	0.00133104
GOTERM_BP_DIRECT	GO:0090398~cellular senescence	6	4.28571	3.81448e-05	MAPK10, MAP2K1, CDK2, MAPK14, HRAS, IGF1R	137	54	19357	15.6991	0.0787048	0.00145488	0.00135536
GOTERM_BP_DIRECT	GO:0010863~positive regulation of phospholipase C activity	4	2.85714	3.92661e-05	KIT, HRAS, ESR1, FGFR1	137	10	19357	56.5168	0.0809221	0.00145488	0.00135536
GOTERM_BP_DIRECT	GO:0030518~intracellular steroid hormone receptor signaling pathway	4	2.85714	3.92661e-05	AR, PGR, NR3C1, ESR1	137	10	19357	56.5168	0.0809221	0.00145488	0.00135536
GOTERM_BP_DIRECT	GO:0048146~positive regulation of fibroblast proliferation	6	4.28571	4.1724e-05	CDK6, CDK4, IGF1, HRAS, ESR1, EGFR	137	55	19357	15.4137	0.0857642	0.00151974	0.00141579
GOTERM_BP_DIRECT	GO:0030307~positive regulation of cell growth	7	5	4.67906e-05	CDC42, ADAM17, F2, S100A9, EGFR, TGFBR1, IL2	137	92	19357	10.7505	0.095665	0.00167588	0.00156125
GOTERM_BP_DIRECT	GO:0010629~negative regulation of gene expression	11	7.85714	6.70741e-05	GSK3B, BMP2, NOS2, ROCK2, KDR, PGR, PPARG, IGF1, MMP8, HRAS, ESR1	137	309	19357	5.02981	0.13424	0.00236299	0.00220135
GOTERM_BP_DIRECT	GO:0043552~positive regulation of phosphatidylinositol 3-kinase activity	5	3.57143	7.19559e-05	CDC42, SRC, KIT, TEK, PTK2	137	32	19357	22.0769	0.143275	0.00249409	0.00232348
GOTERM_BP_DIRECT	GO:0050727~regulation of inflammatory response	7	5	8.80917e-05	CASP1, XIAP, JAK2, PTGS2, SELE, ESR1, PTGES	137	103	19357	9.60237	0.172476	0.00300491	0.00279936
GOTERM_BP_DIRECT	GO:0048011~neurotrophin TRK receptor signaling pathway	4	2.85714	9.21481e-05	NTRK1, SRC, CASP3, PTPN11	137	13	19357	43.4745	0.179659	0.00309416	0.00288251
GOTERM_BP_DIRECT	GO:0045944~positive regulation of transcription from RNA polymerase II promoter	22	15.7143	0.00010023	XBP1, STAT1, VDR, NR1I2, IGF1, ADRB2, MAPK14, NR3C1, ESR1, EGFR, IL2, MMP12, IKBKB, AR, BMP2, RARA, RARB, PGR, PPARG, JAK2, HRAS, MET	137	1204	19357	2.58175	0.193785	0.00331376	0.00308709
GOTERM_BP_DIRECT	GO:2001235~positive regulation of apoptotic signaling pathway	5	3.57143	0.000103076	ADORA2A, CTSK, JAK2, CTSS, TGFBR1	137	35	19357	20.1846	0.198701	0.00335621	0.00312664
GOTERM_BP_DIRECT	GO:0043065~positive regulation of apoptotic process	11	7.85714	0.000107087	CASP7, BMP2, SRC, CASP3, MMP2, HMOX1, RARB, PPARG, PTGS2, TGFBR1, TGM2	137	327	19357	4.75294	0.205579	0.00342201	0.00318794
GOTERM_BP_DIRECT	GO:0043154~negative regulation of cysteine-type endopeptidase activity involved in apoptotic process	6	4.28571	0.000108282	GPI, ADORA2A, SRC, DPEP1, XIAP, PTGS2	137	67	19357	12.653	0.207616	0.00342201	0.00318794
GOTERM_BP_DIRECT	GO:0030010~establishment of cell polarity	5	3.57143	0.000115331	GSK3B, HSP90AA1, HSP90AB1, PTK2, IGF1R	137	36	19357	19.6239	0.219532	0.00348248	0.00324426
GOTERM_BP_DIRECT	GO:0042531~positive regulation of tyrosine phosphorylation of STAT protein	6	4.28571	0.000116221	CSF1R, CCL5, KIT, IGF1, JAK2, IL2	137	68	19357	12.4669	0.221023	0.00348248	0.00324426
GOTERM_BP_DIRECT	GO:1904645~response to beta-amyloid	4	2.85714	0.000116677	MMP12, MMP13, MMP2, MMP3	137	14	19357	40.3691	0.221785	0.00348248	0.00324426
GOTERM_BP_DIRECT	GO:0071498~cellular response to fluid shear stress	4	2.85714	0.000116677	XBP1, SRC, MMP2, PTGS2	137	14	19357	40.3691	0.221785	0.00348248	0.00324426
GOTERM_BP_DIRECT	GO:2001237~negative regulation of extrinsic apoptotic signaling pathway	5	3.57143	0.00012861	AR, SRC, GSTP1, IGF1, TGFBR1	137	37	19357	19.0935	0.241491	0.00378606	0.00352708
GOTERM_BP_DIRECT	GO:0042327~positive regulation of phosphorylation	5	3.57143	0.000142961	CSF1R, AR, CCL5, KIT, EGFR	137	38	19357	18.591	0.264529	0.00412008	0.00383825
GOTERM_BP_DIRECT	GO:0016477~cell migration	10	7.14286	0.000143791	CDC42, MMP2, KDR, PIK3CD, RAC1, PIK3CB, MET, PTK2, PIK3CG, FGFR1	137	275	19357	5.13789	0.26584	0.00412008	0.00383825
GOTERM_BP_DIRECT	GO:0071902~positive regulation of protein serine/threonine kinase activity	5	3.57143	0.000212119	CSF1R, MAP2K1, HSP90AB1, SRC, ADRB2	137	42	19357	16.8205	0.366117	0.00592004	0.00551508
GOTERM_BP_DIRECT	GO:0030217~T cell differentiation	5	3.57143	0.000212119	ZAP70, LCK, KIT, PIK3CD, IL2	137	42	19357	16.8205	0.366117	0.00592004	0.00551508
GOTERM_BP_DIRECT	GO:0042542~response to hydrogen peroxide	5	3.57143	0.000232608	STAT1, CASP3, MMP2, HMOX1, SOD2	137	43	19357	16.4293	0.393428	0.00640864	0.00597026
GOTERM_BP_DIRECT	GO:0060065~uterus development	4	2.85714	0.000256231	RBP4, SRC, ESR1, CYP19A1	137	18	19357	31.3982	0.42346	0.00697012	0.00649334
GOTERM_BP_DIRECT	GO:0071407~cellular response to organic cyclic compound	5	3.57143	0.000277798	BMP2, HSP90AB1, STAT1, CCL5, LRRK2	137	45	19357	15.6991	0.449578	0.00728033	0.00678233
GOTERM_BP_DIRECT	GO:0048870~cell motility	5	3.57143	0.000277798	ADAM17, MAP2K1, RAC1, PTK2, TGFBR1	137	45	19357	15.6991	0.449578	0.00728033	0.00678233
GOTERM_BP_DIRECT	GO:0043407~negative regulation of MAP kinase activity	5	3.57143	0.000277798	BMP2, GSTP1, PPARG, HMGCR, PIK3CB	137	45	19357	15.6991	0.449578	0.00728033	0.00678233
GOTERM_BP_DIRECT	GO:0016485~protein processing	6	4.28571	0.000297598	ADAM17, CASP7, CASP3, CTSG, F3, CTSS	137	83	19357	10.2139	0.472514	0.00770528	0.00717821
GOTERM_BP_DIRECT	GO:1904646~cellular response to beta-amyloid	5	3.57143	0.000302608	GSK3B, IGF1, ADRB2, ICAM1, IGF1R	137	46	19357	15.3578	0.478164	0.00774171	0.00721215
GOTERM_BP_DIRECT	GO:0042981~regulation of apoptotic process	9	6.42857	0.000316536	HSP90AA1, STAT1, CASP1, RARA, XIAP, JAK2, ESR1, JAK3, TGM2	137	242	19357	5.25466	0.493557	0.00800277	0.00745535
GOTERM_BP_DIRECT	GO:0009755~hormone-mediated signaling pathway	5	3.57143	0.000328967	RARA, RARB, REN, PTPN11, PPARG	137	47	19357	15.0311	0.506911	0.00822035	0.00765804
GOTERM_BP_DIRECT	GO:0030154~cell differentiation	15	10.7143	0.000340871	NTRK1, SRC, VDR, LRRK2, NR1I2, EGFR, PGF, PTK2, ZAP70, LCK, RARA, RARB, PPARG, JAK2, JAK3	137	686	19357	3.08947	0.519369	0.0084199	0.00784394
GOTERM_BP_DIRECT	GO:0060391~positive regulation of SMAD protein import into nucleus	4	2.85714	0.000354306	BMP2, PPARG, JAK2, TGFBR1	137	20	19357	28.2584	0.533053	0.00861848	0.00802894
GOTERM_BP_DIRECT	GO:0034097~response to cytokine	5	3.57143	0.000356931	STAT1, MAPKAPK2, RARA, TYMS, SELE	137	48	19357	14.7179	0.53568	0.00861848	0.00802894
GOTERM_BP_DIRECT	GO:0050852~T cell receptor signaling pathway	7	5	0.000400888	IKBKB, ZAP70, LCK, PDE4D, PDE4B, PIK3CD, HRAS	137	136	19357	7.27238	0.577549	0.00957231	0.00891753
GOTERM_BP_DIRECT	GO:0006693~prostaglandin metabolic process	4	2.85714	0.000411238	GSTM1, GSTP1, AKR1B1, PTGES	137	21	19357	26.9128	0.586845	0.00971155	0.00904724
GOTERM_BP_DIRECT	GO:0048013~ephrin receptor signaling pathway	5	3.57143	0.000451009	NTRK1, SRC, MMP2, PTPN11, PTK2	137	51	19357	13.8522	0.620704	0.0103104	0.00960509
GOTERM_BP_DIRECT	GO:0007173~epidermal growth factor receptor signaling pathway	5	3.57143	0.000451009	ADAM17, SRC, PTPN11, PTK2, EGFR	137	51	19357	13.8522	0.620704	0.0103104	0.00960509
GOTERM_BP_DIRECT	GO:0032355~response to estradiol	6	4.28571	0.000455786	GPI, CASP3, RARA, PTGS2, ESR1, CYP19A1	137	91	19357	9.31595	0.624579	0.0103104	0.00960509
GOTERM_BP_DIRECT	GO:0007596~blood coagulation	6	4.28571	0.000455786	PROCR, SERPINA1, ADORA2A, ANXA5, F2, F3	137	91	19357	9.31595	0.624579	0.0103104	0.00960509
GOTERM_BP_DIRECT	GO:0035902~response to immobilization stress	4	2.85714	0.00047373	GPI, REN, PPARG, SOD2	137	22	19357	25.6894	0.638787	0.0106046	0.00987924
GOTERM_BP_DIRECT	GO:1904707~positive regulation of vascular smooth muscle cell proliferation	5	3.57143	0.000485952	XBP1, SRC, MMP2, IGF1, JAK2	137	52	19357	13.5858	0.648155	0.0106562	0.0099273
GOTERM_BP_DIRECT	GO:1902895~positive regulation of pri-miRNA transcription from RNA polymerase II promoter	5	3.57143	0.000485952	AR, BMP2, PPARG, NR3C1, EGFR	137	52	19357	13.5858	0.648155	0.0106562	0.0099273
GOTERM_BP_DIRECT	GO:0045893~positive regulation of transcription, DNA-templated	15	10.7143	0.0005667	MAP2K1, STAT1, SRC, NR1I2, IGF1, ESR1, EGFR, TGFBR1, SEC14L2, IKBKB, AR, BMP2, CDK2, RARA, PPARG	137	722	19357	2.93543	0.704233	0.0123014	0.0114599
GOTERM_BP_DIRECT	GO:0051000~positive regulation of nitric-oxide synthase activity	4	2.85714	0.000696702	DHFR, PIK3CB, ESR1	137	25	19357	22.6067	0.776364	0.0149721	0.013948
GOTERM_BP_DIRECT	GO:0045597~positive regulation of cell differentiation	5	3.57143	0.000737207	GSK3B, AR, HSP90AB1, JAK2, FGFR1	137	58	19357	12.1803	0.79502	0.0156857	0.0146128
GOTERM_BP_DIRECT	GO:0006955~immune response	12	8.57143	0.000778991	ZAP70, XBP1, CNR2, CCL5, CTSK, PIK3CD, CTSG, JAK2, CTSS, IL2, PIK3CG, IGF1R	137	497	19357	3.41148	0.812636	0.0164107	0.0152881
GOTERM_BP_DIRECT	GO:0043627~response to estrogen	5	3.57143	0.000786552	HSP90AA1, MMP2, HMOX1, PPARG, ESR1	137	59	19357	11.9739	0.815659	0.0164107	0.0152881
GOTERM_BP_DIRECT	GO:0002639~positive regulation of immunoglobulin production	4	2.85714	0.000876977	GPI, XBP1, RBP4, IL2	137	27	19357	20.9321	0.848239	0.0181214	0.0168818
GOTERM_BP_DIRECT	GO:0050900~leukocyte migration	4	2.85714	0.00097719	SRC, LCK, PDE4B, ICAM1	137	28	19357	20.1846	0.877667	0.0198111	0.018456
GOTERM_BP_DIRECT	GO:1902042~negative regulation of extrinsic apoptotic signaling pathway via death domain receptors	4	2.85714	0.00097719	GSK3B, NOS3, HMOX1, ICAM1	137	28	19357	20.1846	0.877667	0.0198111	0.018456
GOTERM_BP_DIRECT	GO:0050729~positive regulation of inflammatory response	6	4.28571	0.000993483	FABP4, PLA2G2A, CASP1, JAK2, S100A9, IL2	137	108	19357	7.84955	0.88188	0.0199532	0.0185883
GOTERM_BP_DIRECT	GO:0003417~growth plate cartilage development	3	2.14286	0.00100555	MMP13, RARA, RARB	137	7	19357	60.5537	0.884907	0.0200086	0.0186399
GOTERM_BP_DIRECT	GO:0042752~regulation of circadian rhythm	5	3.57143	0.00106875	MAPK10, GSK3B, PPP1CC, ROCK2, PPARG	137	64	19357	11.0384	0.899538	0.0209938	0.0195577
GOTERM_BP_DIRECT	GO:0048009~insulin-like growth factor receptor signaling pathway	4	2.85714	0.00108437	AR, MAP2K1, IGF1, IGF1R	137	29	19357	19.4885	0.902857	0.0209938	0.0195577
GOTERM_BP_DIRECT	GO:0051602~response to electrical stimulus	4	2.85714	0.00108437	NTRK1, SRC, MMP2, SOD2	137	29	19357	19.4885	0.902857	0.0209938	0.0195577
GOTERM_BP_DIRECT	GO:0006805~xenobiotic metabolic process	6	4.28571	0.00112332	CYP2C9, BCHE, CYP2D6, GSTP1, NR1I2, SULT2A1	137	111	19357	7.6374	0.910666	0.0215537	0.0200793
GOTERM_BP_DIRECT	GO:0007611~learning or memory	5	3.57143	0.00119927	NTRK1, GPI, SRC, CASP3, EGFR	137	66	19357	10.7039	0.924133	0.0228074	0.0212473
GOTERM_BP_DIRECT	GO:0071466~cellular response to xenobiotic stimulus	5	3.57143	0.00126854	RAP2A, NOS2, PDE4B, DPEP1, REN	137	67	19357	10.5442	0.934639	0.0239131	0.0222773
GOTERM_BP_DIRECT	GO:0032148~activation of protein kinase B activity	4	2.85714	0.00132034	SRC, IGF1, PPIA, ADRA2B	137	31	19357	18.2312	0.941533	0.0244605	0.0227873
GOTERM_BP_DIRECT	GO:0010033~response to organic substance	4	2.85714	0.00132034	CDK6, CDK4, ANXA5, CDK2	137	31	19357	18.2312	0.941533	0.0244605	0.0227873
GOTERM_BP_DIRECT	GO:1901687~glutathione derivative biosynthetic process	3	2.14286	0.00133456	GSTM2, GSTM1, GSTP1	137	8	19357	52.9845	0.943295	0.0245126	0.0228358
GOTERM_BP_DIRECT	GO:0045087~innate immune response	13	9.28571	0.0013792	CSF1R, SRC, MMP3, PIK3CD, PIK3CG, PTK2, IKBKB, ZAP70, LCK, LCN2, PPARG, JAK3, S100A9	137	617	19357	2.97698	0.948488	0.0251178	0.0233997
GOTERM_BP_DIRECT	GO:0018107~peptidyl-threonine phosphorylation	5	3.57143	0.00149308	GSK3B, GRK2, ROCK2, LRRK2, TGFBR1	137	70	19357	10.0923	0.959685	0.0269633	0.0251189
GOTERM_BP_DIRECT	GO:0006366~transcription from RNA polymerase II promoter	8	5.71429	0.00151866	AR, XBP1, BMP2, ADRB2, JAK2, MAPK14, ESR1, IL2	137	239	19357	4.72944	0.961844	0.0271967	0.0253363
GOTERM_BP_DIRECT	GO:0043388~positive regulation of DNA binding	4	2.85714	0.00158629	PPARG, IGF1, JAK2, MMP8	137	33	19357	17.1263	0.967013	0.0279421	0.0260308
GOTERM_BP_DIRECT	GO:0048662~negative regulation of smooth muscle cell proliferation	4	2.85714	0.00158629	BMP2, NOS3, HMOX1, PPARG	137	33	19357	17.1263	0.967013	0.0279421	0.0260308
GOTERM_BP_DIRECT	GO:0045822~negative regulation of heart contraction	3	2.14286	0.00170797	PDE4D, JAK2, IL2	137	9	19357	47.0973	0.974614	0.0291304	0.0271378
GOTERM_BP_DIRECT	GO:0001542~ovulation from ovarian follicle	3	2.14286	0.00170797	NOS3, MMP2, PGR	137	9	19357	47.0973	0.974614	0.0291304	0.0271378
GOTERM_BP_DIRECT	GO:0071875~adrenergic receptor signaling pathway	3	2.14286	0.00170797	PDE4D, ADRB2, ADRA2B	137	9	19357	47.0973	0.974614	0.0291304	0.0271378
GOTERM_BP_DIRECT	GO:0051122~hepoxilin biosynthetic process	3	2.14286	0.00170797	GSTM2, GSTM1, GSTP1	137	9	19357	47.0973	0.974614	0.0291304	0.0271378
GOTERM_BP_DIRECT	GO:0035924~cellular response to vascular endothelial growth factor stimulus	4	2.85714	0.00173092	XBP1, MAPKAPK2, KDR, MAPK14	137	34	19357	16.6226	0.975838	0.0292894	0.0272858
GOTERM_BP_DIRECT	GO:0043542~endothelial cell migration	4	2.85714	0.00188353	DPP4, NOS3, S100A9, TGFBR1	137	35	19357	16.1477	0.982604	0.0316227	0.0294596
GOTERM_BP_DIRECT	GO:0051402~neuron apoptotic process	5	3.57143	0.00192655	NTRK1, CASP7, CASP3, XIAP, HRAS	137	75	19357	9.41946	0.984143	0.0320942	0.0298988
GOTERM_BP_DIRECT	GO:0006730~one-carbon metabolic process	4	2.85714	0.00204428	DHFR, MTHFD1, CA2	137	36	19357	15.6991	0.987694	0.0335355	0.0312415
GOTERM_BP_DIRECT	GO:0034612~response to tumor necrosis factor	4	2.85714	0.00204428	CASP3, JAK2, PTGS2, SELE	137	36	19357	15.6991	0.987694	0.0335355	0.0312415
GOTERM_BP_DIRECT	GO:0002070~epithelial cell maturation	3	2.14286	0.00212515	KDR, AKR1B1, PGR	137	10	19357	42.3876	0.989661	0.034598	0.0322314
GOTERM_BP_DIRECT	GO:0035094~response to nicotine	4	2.85714	0.00221331	CASP3, MMP2, HMOX1, IGF1R	137	37	19357	15.2748	0.991449	0.0357624	0.0333161
GOTERM_BP_DIRECT	GO:0032729~positive regulation of interferon-gamma production	5	3.57143	0.00233071	PDE4D, PDE4B, JAK2, HRAS, IL2	137	79	19357	8.94253	0.993359	0.0373783	0.0348215
GOTERM_BP_DIRECT	GO:0001890~placenta development	4	2.85714	0.00239076	HSP90AB1, PPARG, MAPK14, PTK2	137	38	19357	14.8728	0.994165	0.0380574	0.0354541
GOTERM_BP_DIRECT	GO:0050728~negative regulation of inflammatory response	6	4.28571	0.00248911	CNR2, ADORA2A, PPARG, TEK, IL2, ELANE	137	133	19357	6.37407	0.995279	0.0393316	0.0366412
GOTERM_BP_DIRECT	GO:0071394~cellular response to testosterone stimulus	3	2.14286	0.00258547	AR, ROCK2, IGF1R	137	11	19357	38.5342	0.996164	0.040556	0.0377818
GOTERM_BP_DIRECT	GO:0006919~activation of cysteine-type endopeptidase activity involved in apoptotic process	5	3.57143	0.00266967	LCK, PPARG, JAK2, F3, S100A9	137	82	19357	8.61536	0.996801	0.0415733	0.0387295
GOTERM_BP_DIRECT	GO:0031295~T cell costimulation	4	2.85714	0.00277152	DPP4, SRC, LCK, PTPN11	137	40	19357	14.1292	0.997431	0.0425429	0.0396328
GOTERM_BP_DIRECT	GO:0071392~cellular response to estradiol stimulus	4	2.85714	0.00277152	MMP2, ESR1, EGFR, IGF1R	137	40	19357	14.1292	0.997431	0.0425429	0.0396328
GOTERM_BP_DIRECT	GO:0071356~cellular response to tumor necrosis factor	6	4.28571	0.00283278	IKBKB, FABP4, CCL5, CTSK, LRRK2, MAPK14	137	137	19357	6.18797	0.997749	0.0431748	0.0402215
GOTERM_BP_DIRECT	GO:0009409~response to cold	4	2.85714	0.00318763	HSP90AA1, PPARG, ADRB2, SOD2	137	42	19357	13.4564	0.998952	0.048241	0.0449411
GOTERM_BP_DIRECT	GO:0098586~cellular response to virus	5	3.57143	0.00330723	MMP12, HSP90AA1, CCL5, JAK2, MAPK14	137	87	19357	8.12023	0.99919	0.049701	0.0463013
GOTERM_BP_DIRECT	GO:0046427~positive regulation of JAK-STAT cascade	4	2.85714	0.00340926	CCL5, KIT, F2, JAK2	137	43	19357	13.1434	0.99935	0.0508784	0.0473982
GOTERM_BP_DIRECT	GO:0034599~cellular response to oxidative stress	5	3.57143	0.00358894	XBP1, LRRK2, GSR, SOD2, PPIA	137	89	19357	7.93775	0.999559	0.053112	0.0494789
GOTERM_BP_DIRECT	GO:0002523~leukocyte migration involved in inflammatory response	3	2.14286	0.00363307	SELE, S100A9, ELANE	137	13	19357	32.6058	0.999599	0.053112	0.0494789
GOTERM_BP_DIRECT	GO:0033628~regulation of cell adhesion mediated by integrin	3	2.14286	0.00363307	PTPN11, PTK2, PIK3CG	137	13	19357	32.6058	0.999599	0.053112	0.0494789
GOTERM_BP_DIRECT	GO:0030183~B cell differentiation	5	3.57143	0.00373572	NTRK1, ADAM17, KIT, PIK3CD, JAK3	137	90	19357	7.84955	0.999679	0.0542436	0.0505332
GOTERM_BP_DIRECT	GO:0008360~regulation of cell shape	6	4.28571	0.00416869	CSF1R, KIT, KDR, RAC1, F2, PTK2	137	150	19357	5.65168	0.999874	0.0600458	0.0559384
GOTERM_BP_DIRECT	GO:0010389~regulation of G2/M transition of mitotic cell cycle	3	2.14286	0.00421913	CDK6, CDK4, CDK2	137	14	19357	30.2769	0.999887	0.0600458	0.0559384
GOTERM_BP_DIRECT	GO:0007260~tyrosine phosphorylation of STAT protein	3	2.14286	0.00421913	JAK2, JAK3, IL2	137	14	19357	30.2769	0.999887	0.0600458	0.0559384
GOTERM_BP_DIRECT	GO:0007568~aging	6	4.28571	0.0044145	NTRK1, MMP2, TYMS, SOD2, PTGS2, IGF1R	137	152	19357	5.57731	0.999926	0.0624129	0.0581436
GOTERM_BP_DIRECT	GO:0021756~striatum development	3	2.14286	0.00484591	LRRK2, RARB, HPRT1	137	15	19357	28.2584	0.999971	0.0676224	0.0629968
GOTERM_BP_DIRECT	GO:0003376~sphingosine-1-phosphate signaling pathway	3	2.14286	0.00484591	RAC1, PIK3CB, PIK3CG	137	15	19357	28.2584	0.999971	0.0676224	0.0629968
GOTERM_BP_DIRECT	GO:0071346~cellular response to interferon-gamma	5	3.57143	0.00487862	CDC42, NOS2, STAT1, CCL5, CASP1	137	97	19357	7.28309	0.999973	0.0676397	0.0630129
GOTERM_BP_DIRECT	GO:0043536~positive regulation of blood vessel endothelial cell migration	4	2.85714	0.00493638	ADAM17, NOS3, KDR, FGFR1	137	49	19357	11.534	0.999976	0.0680018	0.0633502
GOTERM_BP_DIRECT	GO:0034605~cellular response to heat	4	2.85714	0.00522479	HSP90AA1, HSP90AB1, HMOX1, PTGS2	137	50	19357	11.3034	0.999987	0.0710638	0.0662028
GOTERM_BP_DIRECT	GO:0050673~epithelial cell proliferation	4	2.85714	0.00522479	AR, KIT, KDR, EGFR	137	50	19357	11.3034	0.999987	0.0710638	0.0662028
GOTERM_BP_DIRECT	GO:0071383~cellular response to steroid hormone stimulus	3	2.14286	0.0055128	HSPA8, AR, NR3C1	137	16	19357	26.4922	0.999993	0.0745094	0.0694127
GOTERM_BP_DIRECT	GO:0032869~cellular response to insulin stimulus	5	3.57143	0.0056268	XBP1, STAT1, SRC, CDK4, PPARG	137	101	19357	6.99465	0.999995	0.0755749	0.0704053
GOTERM_BP_DIRECT	GO:0008202~steroid metabolic process	4	2.85714	0.00615008	CYP2C9, CYP2D6, NR1I2, SULT2A1	137	53	19357	10.6635	0.999998	0.0805778	0.075066
GOTERM_BP_DIRECT	GO:0051496~positive regulation of stress fiber assembly	4	2.85714	0.00615008	CDC42, ROCK2, RAC1, TGFBR1	137	53	19357	10.6635	0.999998	0.0805778	0.075066
GOTERM_BP_DIRECT	GO:0046328~regulation of JNK cascade	3	2.14286	0.00621922	RAP2A, EGFR, IGF1R	137	17	19357	24.9339	0.999998	0.0805778	0.075066
GOTERM_BP_DIRECT	GO:0031103~axon regeneration	3	2.14286	0.00621922	DHFR, JAK2	137	17	19357	24.9339	0.999998	0.0805778	0.075066
GOTERM_BP_DIRECT	GO:0071732~cellular response to nitric oxide	3	2.14286	0.00621922	CDK2, MMP3, DPEP1	137	17	19357	24.9339	0.999998	0.0805778	0.075066
GOTERM_BP_DIRECT	GO:0051092~positive regulation of NF-kappaB transcription factor activity	6	4.28571	0.00622425	NTRK1, IKBKB, AR, PRKCQ, PPIA, S100A9	137	165	19357	5.13789	0.999999	0.0805778	0.075066
GOTERM_BP_DIRECT	GO:0030218~erythrocyte differentiation	4	2.85714	0.00647882	CASP3, KIT, JAK2, JAK3	137	54	19357	10.4661	0.999999	0.0828749	0.0772059
GOTERM_BP_DIRECT	GO:0042110~T cell activation	4	2.85714	0.00647882	DPP4, ZAP70, PIK3CD, PIK3CG	137	54	19357	10.4661	0.999999	0.0828749	0.0772059
GOTERM_BP_DIRECT	GO:0008584~male gonad development	5	3.57143	0.00666501	AR, KIT, REN, ESR1, TGFBR1	137	106	19357	6.66472	0.999999	0.0842536	0.0784903
GOTERM_BP_DIRECT	GO:0032760~positive regulation of tumor necrosis factor production	5	3.57143	0.00666501	LRRK2, MAPKAPK2, PTPN11, JAK2, MMP8	137	106	19357	6.66472	0.999999	0.0842536	0.0784903
GOTERM_BP_DIRECT	GO:0042572~retinol metabolic process	4	2.85714	0.00681785	RBP4, TTR, CYP2D6, AKR1B1	137	55	19357	10.2758	1	0.0856816	0.0798207
GOTERM_BP_DIRECT	GO:0045471~response to ethanol	5	3.57143	0.00688685	CTSK, RARA, TYMS, IL2, IGF1R	137	107	19357	6.60243	1	0.0860167	0.0801328
GOTERM_BP_DIRECT	GO:0051492~regulation of stress fiber assembly	3	2.14286	0.00696459	CDC42, ROCK2, RAC1	137	18	19357	23.5487	1	0.0860167	0.0801328
GOTERM_BP_DIRECT	GO:0031396~regulation of protein ubiquitination	3	2.14286	0.00696459	HSP90AA1, HSP90AB1, TGFBR1	137	18	19357	23.5487	1	0.0860167	0.0801328
GOTERM_BP_DIRECT	GO:0009612~response to mechanical stimulus	4	2.85714	0.00716725	STAT1, SRC, MMP2, PPARG	137	56	19357	10.0923	1	0.0880138	0.0819933
GOTERM_BP_DIRECT	GO:0051384~response to glucocorticoid	4	2.85714	0.00752709	BCHE, CASP3, TYMS, PTGS2	137	57	19357	9.91523	1	0.0919075	0.0856206
GOTERM_BP_DIRECT	GO:0010759~positive regulation of macrophage chemotaxis	3	2.14286	0.00774834	CSF1R, CCL5, PTK2	137	19	19357	22.3093	1	0.0925066	0.0861788
GOTERM_BP_DIRECT	GO:0001516~prostaglandin biosynthetic process	3	2.14286	0.00774834	PTGS2, PTGES, PTGS1	137	19	19357	22.3093	1	0.0925066	0.0861788
GOTERM_BP_DIRECT	GO:0033189~response to vitamin A	3	2.14286	0.00774834	RARA, PPARG, TYMS	137	19	19357	22.3093	1	0.0925066	0.0861788
GOTERM_BP_DIRECT	GO:0048384~retinoic acid receptor signaling pathway	3	2.14286	0.00774834	RARA, RARB, PPARG	137	19	19357	22.3093	1	0.0925066	0.0861788
GOTERM_BP_DIRECT	GO:0045165~cell fate commitment	4	2.85714	0.00789745	BMP2, CASP3, KDR, PPARG	137	58	19357	9.74427	1	0.0937658	0.0873519
GOTERM_BP_DIRECT	GO:0071391~cellular response to estrogen stimulus	3	2.14286	0.0085699	AR, RARA, ESR1	137	20	19357	21.1938	1	0.100638	0.0937538
GOTERM_BP_DIRECT	GO:2000251~positive regulation of actin cytoskeleton reorganization	3	2.14286	0.0085699	CDC42, TEK, HRAS	137	20	19357	21.1938	1	0.100638	0.0937538
GOTERM_BP_DIRECT	GO:0000122~negative regulation of transcription from RNA polymerase II promoter	15	10.7143	0.00932108	XBP1, STAT1, VDR, NR1I2, NR3C1, ESR1, MMP12, AR, BMP2, CDK6, CDK2, RARA, RARB, PPARG, ELANE	137	983	19357	2.15603	1	0.108355	0.100943
GOTERM_BP_DIRECT	GO:0042593~glucose homeostasis	5	3.57143	0.00937804	GPI, RBP4, PTPN11, PPARG, IGF1R	137	117	19357	6.03812	1	0.108355	0.100943
GOTERM_BP_DIRECT	GO:0044267~cellular protein metabolic process	3	2.14286	0.00942871	MMP13, MMP2, CTSG	137	21	19357	20.1846	1	0.108355	0.100943
GOTERM_BP_DIRECT	GO:0036092~phosphatidylinositol-3-phosphate biosynthetic process	3	2.14286	0.00942871	PIK3CD, PIK3CB, PIK3CG	137	21	19357	20.1846	1	0.108355	0.100943
GOTERM_BP_DIRECT	GO:0051091~positive regulation of sequence-specific DNA binding transcription factor activity	5	3.57143	0.00965535	BMP2, KIT, PPARG, JAK2, ESR1	137	118	19357	5.98695	1	0.110369	0.102819
GOTERM_BP_DIRECT	GO:0046686~response to cadmium ion	3	2.14286	0.0103242	GPI, KIT, SOD2	137	22	19357	19.2671	1	0.116772	0.108785
GOTERM_BP_DIRECT	GO:0014911~positive regulation of smooth muscle cell migration	3	2.14286	0.0103242	SRC, CCL5, IGF1	137	22	19357	19.2671	1	0.116772	0.108785
GOTERM_BP_DIRECT	GO:0030097~hemopoiesis	4	2.85714	0.0107897	CSF1R, LCK, KIT, SOD2	137	65	19357	8.69489	1	0.121399	0.113094
GOTERM_BP_DIRECT	GO:0006935~chemotaxis	5	3.57143	0.0111219	MAP2K1, CCL5, PIK3CB, MAPK14, HRAS	137	123	19357	5.74358	1	0.123412	0.11497
GOTERM_BP_DIRECT	GO:0046579~positive regulation of Ras protein signal transduction	3	2.14286	0.0112558	NTRK1, SRC, IGF1	137	23	19357	18.4294	1	0.123412	0.11497
GOTERM_BP_DIRECT	GO:0043303~mast cell degranulation	3	2.14286	0.0112558	KIT, PIK3CD, PIK3CG	137	23	19357	18.4294	1	0.123412	0.11497
GOTERM_BP_DIRECT	GO:0043254~regulation of protein complex assembly	3	2.14286	0.0112558	HSPA8, HSP90AA1, PTPN11	137	23	19357	18.4294	1	0.123412	0.11497
GOTERM_BP_DIRECT	GO:0032331~negative regulation of chondrocyte differentiation	3	2.14286	0.0112558	RARB, PTPN11, TGFBR1	137	23	19357	18.4294	1	0.123412	0.11497
GOTERM_BP_DIRECT	GO:0051726~regulation of cell cycle	7	5	0.0115407	HSPA8, CDK6, HSP90AB1, CDK4, XIAP, HRAS, TGFBR1	137	267	19357	3.70428	1	0.125868	0.117259
GOTERM_BP_DIRECT	GO:0007623~circadian rhythm	4	2.85714	0.0117141	NTRK1, GSK3B, NOS2, TYMS	137	67	19357	8.43534	1	0.125868	0.117259
GOTERM_BP_DIRECT	GO:0071560~cellular response to transforming growth factor beta stimulus	4	2.85714	0.0117141	CTSK, NR3C1, TGFBR1, IGF1R	137	67	19357	8.43534	1	0.125868	0.117259
GOTERM_BP_DIRECT	GO:0042102~positive regulation of T cell proliferation	4	2.85714	0.0117141	CCL5, PRKCQ, JAK2, JAK3	137	67	19357	8.43534	1	0.125868	0.117259
GOTERM_BP_DIRECT	GO:1902894~negative regulation of pri-miRNA transcription from RNA polymerase II promoter	3	2.14286	0.0122231	RARA, PPARG, ESR1	137	24	19357	17.6615	1	0.130684	0.121744
GOTERM_BP_DIRECT	GO:0006469~negative regulation of protein kinase activity	4	2.85714	0.0126828	FABP4, ADORA2A, GSTP1, PPIA	137	69	19357	8.19084	1	0.134263	0.125079
GOTERM_BP_DIRECT	GO:0021766~hippocampus development	4	2.85714	0.0126828	GSK3B, CASP3, RARA, IGF1R	137	69	19357	8.19084	1	0.134263	0.125079
GOTERM_BP_DIRECT	GO:0043393~regulation of protein binding	3	2.14286	0.0132254	CDC42, SRC, TGFBR1	137	25	19357	16.955	1	0.138641	0.129157
GOTERM_BP_DIRECT	GO:0071353~cellular response to interleukin-4	3	2.14286	0.0132254	XBP1, HSP90AB1, CDK4	137	25	19357	16.955	1	0.138641	0.129157
GOTERM_BP_DIRECT	GO:0035747~natural killer cell chemotaxis	2	1.42857	0.0140028	PIK3CD, PIK3CG	137	2	19357	141.292	1	0.143981	0.134132
GOTERM_BP_DIRECT	GO:0001315~age-dependent response to reactive oxygen species	2	1.42857	0.0140028	SOD2	137	2	19357	141.292	1	0.143981	0.134132
GOTERM_BP_DIRECT	GO:1901898~negative regulation of relaxation of cardiac muscle	2	1.42857	0.0140028	PDE4D, PDE4B	137	2	19357	141.292	1	0.143981	0.134132
GOTERM_BP_DIRECT	GO:0014806~smooth muscle hyperplasia	2	1.42857	0.0140028	NOS3, HMOX1	137	2	19357	141.292	1	0.143981	0.134132
GOTERM_BP_DIRECT	GO:0051894~positive regulation of focal adhesion assembly	3	2.14286	0.0142622	KDR, TEK, RAC1	137	26	19357	16.3029	1	0.144573	0.134684
GOTERM_BP_DIRECT	GO:0045453~bone resorption	3	2.14286	0.0142622	SRC, CTSK, ADRB2	137	26	19357	16.3029	1	0.144573	0.134684
GOTERM_BP_DIRECT	GO:0032740~positive regulation of interleukin-17 production	3	2.14286	0.0142622	PRKCQ, JAK2, IL2	137	26	19357	16.3029	1	0.144573	0.134684
GOTERM_BP_DIRECT	GO:0001501~skeletal system development	5	3.57143	0.0148349	BMP2, VDR, IGF1, TGFBR1, FGFR1	137	134	19357	5.27209	1	0.149673	0.139434
GOTERM_BP_DIRECT	GO:0097746~regulation of blood vessel diameter	3	2.14286	0.0164373	ROCK2, NOS3, ADRB2	137	28	19357	15.1384	1	0.165064	0.153773
GOTERM_BP_DIRECT	GO:0032092~positive regulation of protein binding	4	2.85714	0.0170057	GSK3B, BMP2, HSP90AB1, LRRK2	137	77	19357	7.33984	1	0.169978	0.158351
GOTERM_BP_DIRECT	GO:0042104~positive regulation of activated T cell proliferation	3	2.14286	0.0175746	IGF1, JAK3, IL2	137	29	19357	14.6164	1	0.173468	0.161602
GOTERM_BP_DIRECT	GO:0071549~cellular response to dexamethasone stimulus	3	2.14286	0.0175746	JAK2, NR3C1, IGF1R	137	29	19357	14.6164	1	0.173468	0.161602
GOTERM_BP_DIRECT	GO:0048511~rhythmic process	4	2.85714	0.017597	MAPK10, GSK3B, ROCK2, PPARG	137	78	19357	7.24574	1	0.173468	0.161602
GOTERM_BP_DIRECT	GO:0001889~liver development	4	2.85714	0.0181996	XBP1, RARA, SOD2, MET	137	79	19357	7.15402	1	0.178589	0.166373
GOTERM_BP_DIRECT	GO:0010592~positive regulation of lamellipodium assembly	3	2.14286	0.0187443	CDC42, HSP90AA1, RAC1	137	30	19357	14.1292	1	0.183097	0.170573
GOTERM_BP_DIRECT	GO:0035987~endodermal cell differentiation	3	2.14286	0.0199459	MAP2K1, MMP2, MMP8	137	31	19357	13.6734	1	0.19308	0.179873
GOTERM_BP_DIRECT	GO:0051968~positive regulation of synaptic transmission, glutamatergic	3	2.14286	0.0199459	NTRK1, ADORA2A, PTGS2	137	31	19357	13.6734	1	0.19308	0.179873
GOTERM_BP_DIRECT	GO:0010508~positive regulation of autophagy	4	2.85714	0.0200758	GSK3B, XBP1, LRRK2, PIK3CB	137	82	19357	6.89229	1	0.193466	0.180232
GOTERM_BP_DIRECT	GO:0007565~female pregnancy	4	2.85714	0.020724	STS, RARA, ADRA2B, PGF	137	83	19357	6.80925	1	0.194722	0.181402
GOTERM_BP_DIRECT	GO:0031427~response to methotrexate	2	1.42857	0.020931	DHFR	137	3	19357	94.1946	1	0.194722	0.181402
GOTERM_BP_DIRECT	GO:1900100~positive regulation of plasma cell differentiation	2	1.42857	0.020931	XBP1, IL2	137	3	19357	94.1946	1	0.194722	0.181402
GOTERM_BP_DIRECT	GO:0060374~mast cell differentiation	2	1.42857	0.020931	KIT, PIK3CD	137	3	19357	94.1946	1	0.194722	0.181402
GOTERM_BP_DIRECT	GO:0031644~regulation of neurological system process	2	1.42857	0.020931	ROCK2, NOS3	137	3	19357	94.1946	1	0.194722	0.181402
GOTERM_BP_DIRECT	GO:0002679~respiratory burst involved in defense response	2	1.42857	0.020931	PIK3CD, PIK3CG	137	3	19357	94.1946	1	0.194722	0.181402
GOTERM_BP_DIRECT	GO:0060748~tertiary branching involved in mammary gland duct morphogenesis	2	1.42857	0.020931	AR, PGR	137	3	19357	94.1946	1	0.194722	0.181402
GOTERM_BP_DIRECT	GO:0021697~cerebellar cortex formation	2	1.42857	0.020931	MAP2K1, PTPN11	137	3	19357	94.1946	1	0.194722	0.181402
GOTERM_BP_DIRECT	GO:0007159~leukocyte cell-cell adhesion	3	2.14286	0.021179	CCL5, SELE, ICAM1	137	32	19357	13.2461	1	0.19618	0.18276
GOTERM_BP_DIRECT	GO:0017148~negative regulation of translation	4	2.85714	0.0213837	DHFR, RARA, TYMS	137	84	19357	6.72819	1	0.197226	0.183735
GOTERM_BP_DIRECT	GO:0060612~adipose tissue development	3	2.14286	0.0224431	XBP1, CDK4, HRAS	137	33	19357	12.8447	1	0.204365	0.190386
GOTERM_BP_DIRECT	GO:0002040~sprouting angiogenesis	3	2.14286	0.0224431	CDC42, TEK, PGF	137	33	19357	12.8447	1	0.204365	0.190386
GOTERM_BP_DIRECT	GO:0046677~response to antibiotic	3	2.14286	0.0224431	HSP90AA1, CASP3, JAK2	137	33	19357	12.8447	1	0.204365	0.190386
GOTERM_BP_DIRECT	GO:0007204~positive regulation of cytosolic calcium ion concentration	5	3.57143	0.0228297	JAK2, ESR1, JAK3, IL2, PIK3CG	137	153	19357	4.61738	1	0.207009	0.192849
GOTERM_BP_DIRECT	GO:0050873~brown fat cell differentiation	3	2.14286	0.0237376	FABP4, ADRB2, PTGS2	137	34	19357	12.4669	1	0.21255	0.198011
GOTERM_BP_DIRECT	GO:0051973~positive regulation of telomerase activity	3	2.14286	0.0237376	HSP90AA1, HSP90AB1, PRKCQ	137	34	19357	12.4669	1	0.21255	0.198011
GOTERM_BP_DIRECT	GO:0001975~response to amphetamine	3	2.14286	0.0237376	CNR2, ADORA2A, HPRT1	137	34	19357	12.4669	1	0.21255	0.198011
GOTERM_BP_DIRECT	GO:0045666~positive regulation of neuron differentiation	4	2.85714	0.0248533	BMP2, RARA, ADRA2B, FGFR1	137	89	19357	6.3502	1	0.220702	0.205605
GOTERM_BP_DIRECT	GO:0060079~excitatory postsynaptic potential	4	2.85714	0.0248533	GSK3B, ADORA2A, LRRK2, HTR3A	137	89	19357	6.3502	1	0.220702	0.205605
GOTERM_BP_DIRECT	GO:0090050~positive regulation of cell migration involved in sprouting angiogenesis	3	2.14286	0.0250621	KDR, HMOX1, PTGS2	137	35	19357	12.1107	1	0.220731	0.205632
GOTERM_BP_DIRECT	GO:0071526~semaphorin-plexin signaling pathway	3	2.14286	0.0250621	KDR, RAC1, MET	137	35	19357	12.1107	1	0.220731	0.205632
GOTERM_BP_DIRECT	GO:0050731~positive regulation of peptidyl-tyrosine phosphorylation	4	2.85714	0.0263211	SRC, PTPN11, IGF1, JAK2	137	91	19357	6.21064	1	0.228113	0.212509
GOTERM_BP_DIRECT	GO:0033138~positive regulation of peptidyl-serine phosphorylation	4	2.85714	0.0263211	HSP90AA1, HSP90AB1, PTGS2, EGFR	137	91	19357	6.21064	1	0.228113	0.212509
GOTERM_BP_DIRECT	GO:0032743~positive regulation of interleukin-2 production	3	2.14286	0.026416	PDE4D, PDE4B, PRKCQ	137	36	19357	11.7743	1	0.228113	0.212509
GOTERM_BP_DIRECT	GO:2000352~negative regulation of endothelial cell apoptotic process	3	2.14286	0.026416	KDR, TEK, ICAM1	137	36	19357	11.7743	1	0.228113	0.212509
GOTERM_BP_DIRECT	GO:0035264~multicellular organism growth	4	2.85714	0.0270721	AR, RARA, RARB, PTPN11	137	92	19357	6.14313	1	0.228113	0.212509
GOTERM_BP_DIRECT	GO:0048469~cell maturation	3	2.14286	0.0277991	KDR, REN, PPARG	137	37	19357	11.4561	1	0.228113	0.212509
GOTERM_BP_DIRECT	GO:0046326~positive regulation of glucose import	3	2.14286	0.0277991	PTPN11, IGF1, MAPK14	137	37	19357	11.4561	1	0.228113	0.212509
GOTERM_BP_DIRECT	GO:0060745~mammary gland branching involved in pregnancy	2	1.42857	0.0278109	VDR, ESR1	137	4	19357	70.646	1	0.228113	0.212509
GOTERM_BP_DIRECT	GO:0006545~glycine biosynthetic process	2	1.42857	0.0278109	DHFR	137	4	19357	70.646	1	0.228113	0.212509
GOTERM_BP_DIRECT	GO:0045986~negative regulation of smooth muscle contraction	2	1.42857	0.0278109	ADRB2, PTGS2	137	4	19357	70.646	1	0.228113	0.212509
GOTERM_BP_DIRECT	GO:1905323~telomerase holoenzyme complex assembly	2	1.42857	0.0278109	HSP90AA1, HSP90AB1	137	4	19357	70.646	1	0.228113	0.212509
GOTERM_BP_DIRECT	GO:0060571~morphogenesis of an epithelial fold	2	1.42857	0.0278109	AR, EGFR	137	4	19357	70.646	1	0.228113	0.212509
GOTERM_BP_DIRECT	GO:0090271~positive regulation of fibroblast growth factor production	2	1.42857	0.0278109	ROCK2, PTGS2	137	4	19357	70.646	1	0.228113	0.212509
GOTERM_BP_DIRECT	GO:0046452~dihydrofolate metabolic process	2	1.42857	0.0278109	DHFR	137	4	19357	70.646	1	0.228113	0.212509
GOTERM_BP_DIRECT	GO:0018916~nitrobenzene metabolic process	2	1.42857	0.0278109	GSTM2, GSTM1	137	4	19357	70.646	1	0.228113	0.212509
GOTERM_BP_DIRECT	GO:1901532~regulation of hematopoietic progenitor cell differentiation	2	1.42857	0.0278109	RARA, KDR	137	4	19357	70.646	1	0.228113	0.212509
GOTERM_BP_DIRECT	GO:0070945~neutrophil mediated killing of gram-negative bacterium	2	1.42857	0.0278109	F2, ELANE	137	4	19357	70.646	1	0.228113	0.212509
GOTERM_BP_DIRECT	GO:0002551~mast cell chemotaxis	2	1.42857	0.0278109	KIT, PIK3CD	137	4	19357	70.646	1	0.228113	0.212509
GOTERM_BP_DIRECT	GO:0031333~negative regulation of protein complex assembly	3	2.14286	0.0292106	CDC42, GSK3B, SRC	137	38	19357	11.1546	1	0.238683	0.222356
GOTERM_BP_DIRECT	GO:0031647~regulation of protein stability	4	2.85714	0.0293934	HSPA8, XBP1, CASP3, LRRK2	137	95	19357	5.94914	1	0.239267	0.2229
GOTERM_BP_DIRECT	GO:0043408~regulation of MAPK cascade	3	2.14286	0.0306503	CSF1R, KDR, REN	137	39	19357	10.8686	1	0.248557	0.231554
GOTERM_BP_DIRECT	GO:0046330~positive regulation of JNK cascade	4	2.85714	0.0318168	CDC42, XIAP, MMP8, HRAS	137	98	19357	5.76702	1	0.257046	0.239463
GOTERM_BP_DIRECT	GO:0045737~positive regulation of cyclin-dependent protein serine/threonine kinase activity	3	2.14286	0.0321176	ADAM17, SRC, EGFR	137	40	19357	10.5969	1	0.25754	0.239923
GOTERM_BP_DIRECT	GO:0048286~lung alveolus development	3	2.14286	0.0321176	MMP12, KDR, PGR	137	40	19357	10.5969	1	0.25754	0.239923
GOTERM_BP_DIRECT	GO:0030512~negative regulation of transforming growth factor beta receptor signaling pathway	4	2.85714	0.0334889	ADAM17, XBP1, BMP2, PPARG	137	100	19357	5.65168	1	0.263065	0.24507
GOTERM_BP_DIRECT	GO:0046718~viral entry into host cell	4	2.85714	0.0334889	DPP4, GRK2, EGFR, ICAM1	137	100	19357	5.65168	1	0.263065	0.24507
GOTERM_BP_DIRECT	GO:0001541~ovarian follicle development	3	2.14286	0.0336121	MMP2, KIT, KDR	137	41	19357	10.3384	1	0.263065	0.24507
GOTERM_BP_DIRECT	GO:0033031~positive regulation of neutrophil apoptotic process	2	1.42857	0.0346428	PIK3CD, PIK3CB	137	5	19357	56.5168	1	0.263065	0.24507
GOTERM_BP_DIRECT	GO:0035624~receptor transactivation	2	1.42857	0.0346428	ADAM17, ADRA2B	137	5	19357	56.5168	1	0.263065	0.24507
GOTERM_BP_DIRECT	GO:0032310~prostaglandin secretion	2	1.42857	0.0346428	NOS2, PTGS2	137	5	19357	56.5168	1	0.263065	0.24507
GOTERM_BP_DIRECT	GO:0070458~cellular detoxification of nitrogen compound	2	1.42857	0.0346428	GSTM2, GSTM1	137	5	19357	56.5168	1	0.263065	0.24507
GOTERM_BP_DIRECT	GO:0072734~cellular response to staurosporine	2	1.42857	0.0346428	CASP7, CASP3	137	5	19357	56.5168	1	0.263065	0.24507
GOTERM_BP_DIRECT	GO:0035509~negative regulation of myosin-light-chain-phosphatase activity	2	1.42857	0.0346428	IKBKB, ROCK2	137	5	19357	56.5168	1	0.263065	0.24507
GOTERM_BP_DIRECT	GO:0014061~regulation of norepinephrine secretion	2	1.42857	0.0346428	ADORA2A, ADORA3	137	5	19357	56.5168	1	0.263065	0.24507
GOTERM_BP_DIRECT	GO:0010656~negative regulation of muscle cell apoptotic process	2	1.42857	0.0346428	HMOX1, IGF1R	137	5	19357	56.5168	1	0.263065	0.24507
GOTERM_BP_DIRECT	GO:0018119~peptidyl-cysteine S-nitrosylation	2	1.42857	0.0346428	NOS2, S100A9	137	5	19357	56.5168	1	0.263065	0.24507
GOTERM_BP_DIRECT	GO:0031670~cellular response to nutrient	2	1.42857	0.0346428	XBP1, HMOX1	137	5	19357	56.5168	1	0.263065	0.24507
GOTERM_BP_DIRECT	GO:0060338~regulation of type I interferon-mediated signaling pathway	2	1.42857	0.0346428	HSP90AB1, PTPN11	137	5	19357	56.5168	1	0.263065	0.24507
GOTERM_BP_DIRECT	GO:0055012~ventricular cardiac muscle cell differentiation	2	1.42857	0.0346428	RARA, RARB	137	5	19357	56.5168	1	0.263065	0.24507
GOTERM_BP_DIRECT	GO:0030316~osteoclast differentiation	3	2.14286	0.0351333	CSF1R, BMP2, MAPK14	137	42	19357	10.0923	1	0.264917	0.246796
GOTERM_BP_DIRECT	GO:0031663~lipopolysaccharide-mediated signaling pathway	3	2.14286	0.0351333	NOS3, CCL5, MAPK14	137	42	19357	10.0923	1	0.264917	0.246796
GOTERM_BP_DIRECT	GO:0032755~positive regulation of interleukin-6 production	4	2.85714	0.0360813	XBP1, NOS2, PTPN11, MMP8	137	103	19357	5.48707	1	0.271114	0.252569
GOTERM_BP_DIRECT	GO:0045454~cell redox homeostasis	3	2.14286	0.0366808	NOS2, NOS3, GSR	137	43	19357	9.85758	1	0.272758	0.2541
GOTERM_BP_DIRECT	GO:0030501~positive regulation of bone mineralization	3	2.14286	0.0366808	BMP2, VDR, ADRB2	137	43	19357	9.85758	1	0.272758	0.2541
GOTERM_BP_DIRECT	GO:0007259~JAK-STAT cascade	3	2.14286	0.0366808	STAT1, JAK2, JAK3	137	43	19357	9.85758	1	0.272758	0.2541
GOTERM_BP_DIRECT	GO:0048863~stem cell differentiation	3	2.14286	0.0382542	KIT, MAPK14, ESR1	137	44	19357	9.63354	1	0.282068	0.262774
GOTERM_BP_DIRECT	GO:0050918~positive chemotaxis	3	2.14286	0.0382542	CCL5, MET, PGF	137	44	19357	9.63354	1	0.282068	0.262774
GOTERM_BP_DIRECT	GO:0002250~adaptive immune response	8	5.71429	0.0394032	ZAP70, TAP1, PIK3CD, JAK2, JAK3, CTSS, IL2, PIK3CG	137	449	19357	2.51745	1	0.282068	0.262774
GOTERM_BP_DIRECT	GO:1904706~negative regulation of vascular smooth muscle cell proliferation	3	2.14286	0.039853	HMOX1, PPARG, SOD2	137	45	19357	9.41946	1	0.282068	0.262774
GOTERM_BP_DIRECT	GO:0009411~response to UV	3	2.14286	0.039853	CASP7, CASP3, ELANE	137	45	19357	9.41946	1	0.282068	0.262774
GOTERM_BP_DIRECT	GO:0045747~positive regulation of Notch signaling pathway	3	2.14286	0.039853	SRC, NOS3, KIT	137	45	19357	9.41946	1	0.282068	0.262774
GOTERM_BP_DIRECT	GO:0032722~positive regulation of chemokine production	3	2.14286	0.039853	CSF1R, ADAM17, HMOX1	137	45	19357	9.41946	1	0.282068	0.262774
GOTERM_BP_DIRECT	GO:0030198~extracellular matrix organization	5	3.57143	0.0409797	MMP12, MMP13, MMP2, MMP3, MMP8	137	184	19357	3.83946	1	0.282068	0.262774
GOTERM_BP_DIRECT	GO:0031000~response to caffeine	2	1.42857	0.041427	ADORA2A, PPARG	137	6	19357	47.0973	1	0.282068	0.262774
GOTERM_BP_DIRECT	GO:1904037~positive regulation of epithelial cell apoptotic process	2	1.42857	0.041427	HMOX1, JAK2	137	6	19357	47.0973	1	0.282068	0.262774
GOTERM_BP_DIRECT	GO:1990776~response to angiotensin	2	1.42857	0.041427	ROCK2, PTGS2	137	6	19357	47.0973	1	0.282068	0.262774
GOTERM_BP_DIRECT	GO:0050819~negative regulation of coagulation	2	1.42857	0.041427	PROCR, ANXA5	137	6	19357	47.0973	1	0.282068	0.262774
GOTERM_BP_DIRECT	GO:0031284~positive regulation of guanylate cyclase activity	2	1.42857	0.041427	NOS2, NOS3	137	6	19357	47.0973	1	0.282068	0.262774
GOTERM_BP_DIRECT	GO:0010632~regulation of epithelial cell migration	2	1.42857	0.041427	SRC, PTK2	137	6	19357	47.0973	1	0.282068	0.262774
GOTERM_BP_DIRECT	GO:1903347~negative regulation of bicellular tight junction assembly	2	1.42857	0.041427	IKBKB, ROCK2	137	6	19357	47.0973	1	0.282068	0.262774
GOTERM_BP_DIRECT	GO:0006706~steroid catabolic process	2	1.42857	0.041427	HSD11B1, STS	137	6	19357	47.0973	1	0.282068	0.262774
GOTERM_BP_DIRECT	GO:0045428~regulation of nitric oxide biosynthetic process	2	1.42857	0.041427	RAC1, JAK2	137	6	19357	47.0973	1	0.282068	0.262774
GOTERM_BP_DIRECT	GO:0035022~positive regulation of Rac protein signal transduction	2	1.42857	0.041427	PIK3CB, PIK3CG	137	6	19357	47.0973	1	0.282068	0.262774
GOTERM_BP_DIRECT	GO:0016098~monoterpenoid metabolic process	2	1.42857	0.041427	CYP2C9, CYP2D6	137	6	19357	47.0973	1	0.282068	0.262774
GOTERM_BP_DIRECT	GO:0046654~tetrahydrofolate biosynthetic process	2	1.42857	0.041427	DHFR	137	6	19357	47.0973	1	0.282068	0.262774
GOTERM_BP_DIRECT	GO:0060603~mammary gland duct morphogenesis	2	1.42857	0.041427	CSF1R, NR3C1	137	6	19357	47.0973	1	0.282068	0.262774
GOTERM_BP_DIRECT	GO:0072672~neutrophil extravasation	2	1.42857	0.041427	PIK3CD, PIK3CG	137	6	19357	47.0973	1	0.282068	0.262774
GOTERM_BP_DIRECT	GO:0002068~glandular epithelial cell development	2	1.42857	0.041427	RARA, RARB	137	6	19357	47.0973	1	0.282068	0.262774
GOTERM_BP_DIRECT	GO:0051712~positive regulation of killing of cells of other organism	2	1.42857	0.041427	NOS2, PRF1	137	6	19357	47.0973	1	0.282068	0.262774
GOTERM_BP_DIRECT	GO:0042177~negative regulation of protein catabolic process	3	2.14286	0.0414768	NOS2, HMGCR, EGFR	137	46	19357	9.21469	1	0.282068	0.262774
GOTERM_BP_DIRECT	GO:0038095~Fc-epsilon receptor signaling pathway	3	2.14286	0.0414768	MAPK10, IKBKB, PRKCQ	137	46	19357	9.21469	1	0.282068	0.262774
GOTERM_BP_DIRECT	GO:0009408~response to heat	3	2.14286	0.0414768	HSP90AA1, NOS3, IGF1	137	46	19357	9.21469	1	0.282068	0.262774
GOTERM_BP_DIRECT	GO:0043547~positive regulation of GTPase activity	5	3.57143	0.0423581	NTRK1, GSK3B, CCL5, HRAS, TGM2	137	186	19357	3.79817	1	0.287153	0.267511
GOTERM_BP_DIRECT	GO:0009615~response to virus	4	2.85714	0.0425196	IKBKB, CDK6, SRC, CCL5	137	110	19357	5.13789	1	0.287342	0.267687
GOTERM_BP_DIRECT	GO:0070527~platelet aggregation	3	2.14286	0.0431251	PIK3CB, PPIA, PIK3CG	137	47	19357	9.01864	1	0.29052	0.270647
GOTERM_BP_DIRECT	GO:0007229~integrin-mediated signaling pathway	4	2.85714	0.0434834	CDC42, SRC, PTPN11, PTK2	137	111	19357	5.0916	1	0.292018	0.272043
GOTERM_BP_DIRECT	GO:0042789~mRNA transcription from RNA polymerase II promoter	3	2.14286	0.0447976	VDR, RARA, PPARG	137	48	19357	8.83075	1	0.29713	0.276805
GOTERM_BP_DIRECT	GO:0032526~response to retinoic acid	3	2.14286	0.0447976	RBP4, MMP2, RARA	137	48	19357	8.83075	1	0.29713	0.276805
GOTERM_BP_DIRECT	GO:0046854~phosphatidylinositol phosphorylation	3	2.14286	0.0447976	PIK3CD, PIK3CB, PIK3CG	137	48	19357	8.83075	1	0.29713	0.276805
GOTERM_BP_DIRECT	GO:0048839~inner ear development	3	2.14286	0.0447976	BMP2, MAPKAPK2, PTPN11	137	48	19357	8.83075	1	0.29713	0.276805
GOTERM_BP_DIRECT	GO:0006874~cellular calcium ion homeostasis	4	2.85714	0.0454437	VDR, CCL5, PIK3CB, ELANE	137	113	19357	5.00149	1	0.300488	0.279933
GOTERM_BP_DIRECT	GO:0035630~bone mineralization involved in bone maturation	2	1.42857	0.0481639	BMP2, IGF1	137	7	19357	40.3691	1	0.304737	0.283892
GOTERM_BP_DIRECT	GO:0007167~enzyme linked receptor protein signaling pathway	2	1.42857	0.0481639	JAK2, JAK3	137	7	19357	40.3691	1	0.304737	0.283892
GOTERM_BP_DIRECT	GO:0046813~receptor-mediated virion attachment to host cell	2	1.42857	0.0481639	DPP4, ICAM1	137	7	19357	40.3691	1	0.304737	0.283892
GOTERM_BP_DIRECT	GO:0001957~intramembranous ossification	2	1.42857	0.0481639	MMP2, CTSK	137	7	19357	40.3691	1	0.304737	0.283892
GOTERM_BP_DIRECT	GO:0010742~macrophage derived foam cell differentiation	2	1.42857	0.0481639	STAT1, PPARG	137	7	19357	40.3691	1	0.304737	0.283892
GOTERM_BP_DIRECT	GO:0061037~negative regulation of cartilage development	2	1.42857	0.0481639	CTSK, RARA	137	7	19357	40.3691	1	0.304737	0.283892
GOTERM_BP_DIRECT	GO:0006527~arginine catabolic process	2	1.42857	0.0481639	NOS2, NOS3	137	7	19357	40.3691	1	0.304737	0.283892
GOTERM_BP_DIRECT	GO:0061684~chaperone-mediated autophagy	2	1.42857	0.0481639	HSPA8, HSP90AA1	137	7	19357	40.3691	1	0.304737	0.283892
GOTERM_BP_DIRECT	GO:0071393~cellular response to progesterone stimulus	2	1.42857	0.0481639	SRC, IGF1R	137	7	19357	40.3691	1	0.304737	0.283892
GOTERM_BP_DIRECT	GO:0051239~regulation of multicellular organismal process	2	1.42857	0.0481639	PTK2, TGFBR1	137	7	19357	40.3691	1	0.304737	0.283892
GOTERM_BP_DIRECT	GO:0036016~cellular response to interleukin-3	2	1.42857	0.0481639	GSK3B, JAK2	137	7	19357	40.3691	1	0.304737	0.283892
GOTERM_BP_DIRECT	GO:0021955~central nervous system neuron axonogenesis	2	1.42857	0.0481639	HSP90AA1, HSP90AB1	137	7	19357	40.3691	1	0.304737	0.283892
GOTERM_BP_DIRECT	GO:2000121~regulation of removal of superoxide radicals	2	1.42857	0.0481639	DHFR	137	7	19357	40.3691	1	0.304737	0.283892
GOTERM_BP_DIRECT	GO:0010862~positive regulation of pathway-restricted SMAD protein phosphorylation	3	2.14286	0.0482134	BMP2, PPARG, TGFBR1	137	50	19357	8.47752	1	0.304737	0.283892
GOTERM_BP_DIRECT	GO:0050714~positive regulation of protein secretion	3	2.14286	0.0482134	ADORA2A, IGF1, PPIA	137	50	19357	8.47752	1	0.304737	0.283892
GOTERM_BP_DIRECT	GO:0043491~protein kinase B signaling	3	2.14286	0.0499558	CCL5, KDR, IGF1	137	51	19357	8.31129	1	0.313904	0.292431
GOTERM_BP_DIRECT	GO:0031648~protein destabilization	3	2.14286	0.0499558	XBP1, BMP2, SRC	137	51	19357	8.31129	1	0.313904	0.292431
GOTERM_BP_DIRECT	GO:0006979~response to oxidative stress	4	2.85714	0.0515829	LRRK2, HMOX1, PTGS2, PTGS1	137	119	19357	4.74931	1	0.322168	0.30013
GOTERM_BP_DIRECT	GO:0010718~positive regulation of epithelial to mesenchymal transition	3	2.14286	0.0517208	BMP2, PTK2, TGFBR1	137	52	19357	8.15146	1	0.322168	0.30013
GOTERM_BP_DIRECT	GO:0019233~sensory perception of pain	3	2.14286	0.0517208	CNR2, PTGS2, PTGES	137	52	19357	8.15146	1	0.322168	0.30013
GOTERM_BP_DIRECT	GO:0001932~regulation of protein phosphorylation	3	2.14286	0.0535079	IGF1, PTK2, PIK3CG	137	53	19357	7.99766	1	0.328359	0.305898
GOTERM_BP_DIRECT	GO:0045892~negative regulation of transcription, DNA-templated	9	6.42857	0.0544681	HSPA8, BMP2, FABP4, SRC, VDR, NR1I2, RARA, PPARG, NR3C1	137	585	19357	2.17372	1	0.328359	0.305898
GOTERM_BP_DIRECT	GO:0048762~mesenchymal cell differentiation	2	1.42857	0.0548538	BMP2, TGFBR1	137	8	19357	35.323	1	0.328359	0.305898
GOTERM_BP_DIRECT	GO:0010544~negative regulation of platelet activation	2	1.42857	0.0548538	NOS3, F2	137	8	19357	35.323	1	0.328359	0.305898
GOTERM_BP_DIRECT	GO:0046653~tetrahydrofolate metabolic process	2	1.42857	0.0548538	DHFR	137	8	19357	35.323	1	0.328359	0.305898
GOTERM_BP_DIRECT	GO:0002674~negative regulation of acute inflammatory response	2	1.42857	0.0548538	GSTP1, PPARG	137	8	19357	35.323	1	0.328359	0.305898
GOTERM_BP_DIRECT	GO:0060397~JAK-STAT cascade involved in growth hormone signaling pathway	2	1.42857	0.0548538	JAK2, JAK3	137	8	19357	35.323	1	0.328359	0.305898
GOTERM_BP_DIRECT	GO:0060736~prostate gland growth	2	1.42857	0.0548538	AR, CYP19A1	137	8	19357	35.323	1	0.328359	0.305898
GOTERM_BP_DIRECT	GO:0044788~modulation by host of viral process	2	1.42857	0.0548538	CDC42, ROCK2	137	8	19357	35.323	1	0.328359	0.305898
GOTERM_BP_DIRECT	GO:0006729~tetrahydrobiopterin biosynthetic process	2	1.42857	0.0548538	DHFR	137	8	19357	35.323	1	0.328359	0.305898
GOTERM_BP_DIRECT	GO:0060740~prostate gland epithelium morphogenesis	2	1.42857	0.0548538	AR, MMP2	137	8	19357	35.323	1	0.328359	0.305898
GOTERM_BP_DIRECT	GO:0048584~positive regulation of response to stimulus	2	1.42857	0.0548538	CSF1R, KIT	137	8	19357	35.323	1	0.328359	0.305898
GOTERM_BP_DIRECT	GO:0007172~signal complex assembly	2	1.42857	0.0548538	SRC, PTK2	137	8	19357	35.323	1	0.328359	0.305898
GOTERM_BP_DIRECT	GO:0032873~negative regulation of stress-activated MAPK cascade	2	1.42857	0.0548538	GSTP1, PPIA	137	8	19357	35.323	1	0.328359	0.305898
GOTERM_BP_DIRECT	GO:0030282~bone mineralization	3	2.14286	0.0553167	BMP2, MMP13, PTGS2	137	54	19357	7.84955	1	0.328385	0.305923
GOTERM_BP_DIRECT	GO:0043124~negative regulation of I-kappaB kinase/NF-kappaB signaling	3	2.14286	0.0553167	STAT1, GSTP1, ESR1	137	54	19357	7.84955	1	0.328385	0.305923
GOTERM_BP_DIRECT	GO:0045786~negative regulation of cell cycle	3	2.14286	0.0553167	BMP2, CDK6, PTGS2	137	54	19357	7.84955	1	0.328385	0.305923
GOTERM_BP_DIRECT	GO:0022900~electron transport chain	3	2.14286	0.0571468	GSR, AKR1B1, CYP19A1	137	55	19357	7.70683	1	0.337386	0.314308
GOTERM_BP_DIRECT	GO:0070371~ERK1 and ERK2 cascade	3	2.14286	0.0571468	MAP2K1, KDR, IGF1	137	55	19357	7.70683	1	0.337386	0.314308
GOTERM_BP_DIRECT	GO:0032024~positive regulation of insulin secretion	3	2.14286	0.0589979	RBP4, F2, JAK2	137	56	19357	7.56921	1	0.339736	0.316496
GOTERM_BP_DIRECT	GO:0045600~positive regulation of fat cell differentiation	3	2.14286	0.0589979	XBP1, BMP2, PPARG	137	56	19357	7.56921	1	0.339736	0.316496
GOTERM_BP_DIRECT	GO:0043525~positive regulation of neuron apoptotic process	3	2.14286	0.0589979	CDC42, CASP3, NR3C1	137	56	19357	7.56921	1	0.339736	0.316496
GOTERM_BP_DIRECT	GO:0016310~phosphorylation	4	2.85714	0.0603582	LRRK2, PIK3CD, PIK3CB, PIK3CG	137	127	19357	4.45014	1	0.339736	0.316496
GOTERM_BP_DIRECT	GO:0016525~negative regulation of angiogenesis	4	2.85714	0.0603582	ROCK2, STAT1, PPARG, TEK	137	127	19357	4.45014	1	0.339736	0.316496
GOTERM_BP_DIRECT	GO:0060348~bone development	3	2.14286	0.0608696	BMP2, MAPK14, TGM2	137	57	19357	7.43642	1	0.339736	0.316496
GOTERM_BP_DIRECT	GO:2000300~regulation of synaptic vesicle exocytosis	3	2.14286	0.0608696	GSK3B, ADORA2A, LRRK2	137	57	19357	7.43642	1	0.339736	0.316496
GOTERM_BP_DIRECT	GO:0048012~hepatocyte growth factor receptor signaling pathway	2	1.42857	0.0614971	RAC1, MET	137	9	19357	31.3982	1	0.339736	0.316496
GOTERM_BP_DIRECT	GO:0006198~cAMP catabolic process	2	1.42857	0.0614971	PDE4D, PDE4B	137	9	19357	31.3982	1	0.339736	0.316496
GOTERM_BP_DIRECT	GO:0046456~icosanoid biosynthetic process	2	1.42857	0.0614971	CYP2C9, CASP1	137	9	19357	31.3982	1	0.339736	0.316496
GOTERM_BP_DIRECT	GO:0008354~germ cell migration	2	1.42857	0.0614971	KIT, TGFBR1	137	9	19357	31.3982	1	0.339736	0.316496
GOTERM_BP_DIRECT	GO:0050847~progesterone receptor signaling pathway	2	1.42857	0.0614971	SRC, PGR	137	9	19357	31.3982	1	0.339736	0.316496
GOTERM_BP_DIRECT	GO:0051128~regulation of cellular component organization	2	1.42857	0.0614971	GSK3B, PTK2	137	9	19357	31.3982	1	0.339736	0.316496
GOTERM_BP_DIRECT	GO:0031401~positive regulation of protein modification process	2	1.42857	0.0614971	CSF1R, KIT	137	9	19357	31.3982	1	0.339736	0.316496
GOTERM_BP_DIRECT	GO:1902949~positive regulation of tau-protein kinase activity	2	1.42857	0.0614971	HSP90AA1, HSP90AB1	137	9	19357	31.3982	1	0.339736	0.316496
GOTERM_BP_DIRECT	GO:0010042~response to manganese ion	2	1.42857	0.0614971	SOD2, PTGS2	137	9	19357	31.3982	1	0.339736	0.316496
GOTERM_BP_DIRECT	GO:0019371~cyclooxygenase pathway	2	1.42857	0.0614971	PTGS2, PTGS1	137	9	19357	31.3982	1	0.339736	0.316496
GOTERM_BP_DIRECT	GO:0034224~cellular response to zinc ion starvation	2	1.42857	0.0614971	CTSK, IGF1R	137	9	19357	31.3982	1	0.339736	0.316496
GOTERM_BP_DIRECT	GO:0039694~viral RNA genome replication	2	1.42857	0.0614971	CDC42, ROCK2	137	9	19357	31.3982	1	0.339736	0.316496
GOTERM_BP_DIRECT	GO:2000641~regulation of early endosome to late endosome transport	2	1.42857	0.0614971	MAP2K1, SRC	137	9	19357	31.3982	1	0.339736	0.316496
GOTERM_BP_DIRECT	GO:0002003~angiotensin maturation	2	1.42857	0.0614971	REN, CTSG	137	9	19357	31.3982	1	0.339736	0.316496
GOTERM_BP_DIRECT	GO:0042118~endothelial cell activation	2	1.42857	0.0614971	PPIA, TGFBR1	137	9	19357	31.3982	1	0.339736	0.316496
GOTERM_BP_DIRECT	GO:1903140~regulation of establishment of endothelial barrier	2	1.42857	0.0614971	IKBKB, ROCK2	137	9	19357	31.3982	1	0.339736	0.316496
GOTERM_BP_DIRECT	GO:0051057~positive regulation of small GTPase mediated signal transduction	2	1.42857	0.0614971	SRC, TGM2	137	9	19357	31.3982	1	0.339736	0.316496
GOTERM_BP_DIRECT	GO:0070168~negative regulation of biomineral tissue development	2	1.42857	0.0614971	ROCK2, NOS3	137	9	19357	31.3982	1	0.339736	0.316496
GOTERM_BP_DIRECT	GO:0048666~neuron development	3	2.14286	0.0627614	NTRK1, XBP1, SOD2	137	58	19357	7.30821	1	0.343192	0.319716
GOTERM_BP_DIRECT	GO:0006986~response to unfolded protein	3	2.14286	0.0627614	HSPA8, HSP90AA1, HSP90AB1	137	58	19357	7.30821	1	0.343192	0.319716
GOTERM_BP_DIRECT	GO:0002931~response to ischemia	3	2.14286	0.0627614	CSF1R, ROCK2, PIK3CB	137	58	19357	7.30821	1	0.343192	0.319716
GOTERM_BP_DIRECT	GO:0034446~substrate adhesion-dependent cell spreading	3	2.14286	0.0627614	SRC, TEK, RAC1	137	58	19357	7.30821	1	0.343192	0.319716
GOTERM_BP_DIRECT	GO:0006897~endocytosis	5	3.57143	0.0635003	CDC42, LRRK2, PIK3CB, HRAS, PIK3CG	137	213	19357	3.31671	1	0.346351	0.322659
GOTERM_BP_DIRECT	GO:0050830~defense response to Gram-positive bacterium	4	2.85714	0.0637542	ADAM17, PLA2G2A, CTSG, RAC1	137	130	19357	4.34745	1	0.346855	0.323129
GOTERM_BP_DIRECT	GO:0001701~in utero embryonic development	5	3.57143	0.064373	GPI, AR, BMP2, NOS3, TGFBR1	137	214	19357	3.30121	1	0.349338	0.325442
GOTERM_BP_DIRECT	GO:0071230~cellular response to amino acid stimulus	3	2.14286	0.0646731	XBP1, MMP2, EGFR	137	59	19357	7.18434	1	0.350082	0.326135
GOTERM_BP_DIRECT	GO:0071456~cellular response to hypoxia	4	2.85714	0.0649922	SRC, HMOX1, PPARG, PTGS2	137	131	19357	4.31426	1	0.350925	0.32692
GOTERM_BP_DIRECT	GO:0090263~positive regulation of canonical Wnt signaling pathway	4	2.85714	0.0672476	SRC, LRRK2, XIAP, EGFR	137	133	19357	4.24938	1	0.351764	0.327702
GOTERM_BP_DIRECT	GO:1905461~positive regulation of vascular associated smooth muscle cell apoptotic process	2	1.42857	0.0680939	PPARG, SOD2	137	10	19357	28.2584	1	0.351764	0.327702
GOTERM_BP_DIRECT	GO:0051272~positive regulation of cellular component movement	2	1.42857	0.0680939	ADAM17, TGFBR1	137	10	19357	28.2584	1	0.351764	0.327702
GOTERM_BP_DIRECT	GO:0051093~negative regulation of developmental process	2	1.42857	0.0680939	GSK3B, KIT	137	10	19357	28.2584	1	0.351764	0.327702
GOTERM_BP_DIRECT	GO:0045124~regulation of bone resorption	2	1.42857	0.0680939	CSF1R, SRC	137	10	19357	28.2584	1	0.351764	0.327702
GOTERM_BP_DIRECT	GO:0001973~adenosine receptor signaling pathway	2	1.42857	0.0680939	ADORA2A, ADORA3	137	10	19357	28.2584	1	0.351764	0.327702
GOTERM_BP_DIRECT	GO:0035999~tetrahydrofolate interconversion	2	1.42857	0.0680939	MTHFD1, TYMS	137	10	19357	28.2584	1	0.351764	0.327702
GOTERM_BP_DIRECT	GO:0070234~positive regulation of T cell apoptotic process	2	1.42857	0.0680939	CCL5, ICAM1	137	10	19357	28.2584	1	0.351764	0.327702
GOTERM_BP_DIRECT	GO:1903980~positive regulation of microglial cell activation	2	1.42857	0.0680939	LRRK2, MMP8	137	10	19357	28.2584	1	0.351764	0.327702
GOTERM_BP_DIRECT	GO:0044346~fibroblast apoptotic process	2	1.42857	0.0680939	CASP7, CASP3	137	10	19357	28.2584	1	0.351764	0.327702
GOTERM_BP_DIRECT	GO:0034101~erythrocyte homeostasis	2	1.42857	0.0680939	GPI, HMOX1	137	10	19357	28.2584	1	0.351764	0.327702
GOTERM_BP_DIRECT	GO:0070233~negative regulation of T cell apoptotic process	2	1.42857	0.0680939	CCL5, PRKCQ	137	10	19357	28.2584	1	0.351764	0.327702
GOTERM_BP_DIRECT	GO:0010952~positive regulation of peptidase activity	2	1.42857	0.0680939	CTSK, CTSS	137	10	19357	28.2584	1	0.351764	0.327702
GOTERM_BP_DIRECT	GO:0060068~vagina development	2	1.42857	0.0680939	RBP4, ESR1	137	10	19357	28.2584	1	0.351764	0.327702
GOTERM_BP_DIRECT	GO:0046825~regulation of protein export from nucleus	2	1.42857	0.0680939	GSK3B, PTPN11	137	10	19357	28.2584	1	0.351764	0.327702
GOTERM_BP_DIRECT	GO:0051593~response to folic acid	2	1.42857	0.0680939	BCHE, TYMS	137	10	19357	28.2584	1	0.351764	0.327702
GOTERM_BP_DIRECT	GO:0001780~neutrophil homeostasis	2	1.42857	0.0680939	MTHFD1, PDE4B	137	10	19357	28.2584	1	0.351764	0.327702
GOTERM_BP_DIRECT	GO:0032872~regulation of stress-activated MAPK cascade	2	1.42857	0.0680939	MAP2K1, GSTP1	137	10	19357	28.2584	1	0.351764	0.327702
GOTERM_BP_DIRECT	GO:0071492~cellular response to UV-A	2	1.42857	0.0746448	MMP2, MMP3	137	11	19357	25.6894	1	0.379224	0.353283
GOTERM_BP_DIRECT	GO:0060020~Bergmann glial cell differentiation	2	1.42857	0.0746448	MAP2K1, PTPN11	137	11	19357	25.6894	1	0.379224	0.353283
GOTERM_BP_DIRECT	GO:0043068~positive regulation of programmed cell death	2	1.42857	0.0746448	NTRK1, LRRK2	137	11	19357	25.6894	1	0.379224	0.353283
GOTERM_BP_DIRECT	GO:0045793~positive regulation of cell size	2	1.42857	0.0746448	HSP90AA1, HSP90AB1	137	11	19357	25.6894	1	0.379224	0.353283
GOTERM_BP_DIRECT	GO:0010591~regulation of lamellipodium assembly	2	1.42857	0.0746448	CDC42, RAC1	137	11	19357	25.6894	1	0.379224	0.353283
GOTERM_BP_DIRECT	GO:1900015~regulation of cytokine production involved in inflammatory response	2	1.42857	0.0746448	NOS2, MAPK14	137	11	19357	25.6894	1	0.379224	0.353283
GOTERM_BP_DIRECT	GO:0009651~response to salt stress	2	1.42857	0.0746448	HSP90AA1, HSP90AB1	137	11	19357	25.6894	1	0.379224	0.353283
GOTERM_BP_DIRECT	GO:0032757~positive regulation of interleukin-8 production	3	2.14286	0.0765393	NOS2, F3, ELANE	137	65	19357	6.52117	1	0.387931	0.361395
GOTERM_BP_DIRECT	GO:0007166~cell surface receptor signaling pathway	6	4.28571	0.077844	ADRB2, F2, MAPK14, HRAS, MET, EGFR	137	323	19357	2.62462	1	0.393616	0.366691
GOTERM_BP_DIRECT	GO:0000082~G1/S transition of mitotic cell cycle	3	2.14286	0.0785797	CDK6, CDK4, CDK2	137	66	19357	6.42236	1	0.395475	0.368423
GOTERM_BP_DIRECT	GO:0001819~positive regulation of cytokine production	3	2.14286	0.0785797	SRC, PIK3CD, PIK3CG	137	66	19357	6.42236	1	0.395475	0.368423
GOTERM_BP_DIRECT	GO:0008286~insulin receptor signaling pathway	3	2.14286	0.0806371	GSK3B, HRAS, IGF1R	137	67	19357	6.32651	1	0.399064	0.371767
GOTERM_BP_DIRECT	GO:0046425~regulation of JAK-STAT cascade	2	1.42857	0.0811499	JAK2, JAK3	137	12	19357	23.5487	1	0.399064	0.371767
GOTERM_BP_DIRECT	GO:0051926~negative regulation of calcium ion transport	2	1.42857	0.0811499	NOS3, PTGS2	137	12	19357	23.5487	1	0.399064	0.371767
GOTERM_BP_DIRECT	GO:0050927~positive regulation of positive chemotaxis	2	1.42857	0.0811499	KDR, F3	137	12	19357	23.5487	1	0.399064	0.371767
GOTERM_BP_DIRECT	GO:0051974~negative regulation of telomerase activity	2	1.42857	0.0811499	SRC, PPARG	137	12	19357	23.5487	1	0.399064	0.371767
GOTERM_BP_DIRECT	GO:0038066~p38MAPK cascade	2	1.42857	0.0811499	MAPKAPK2, MAPK14	137	12	19357	23.5487	1	0.399064	0.371767
GOTERM_BP_DIRECT	GO:0002675~positive regulation of acute inflammatory response	2	1.42857	0.0811499	ALOX5AP, PIK3CG	137	12	19357	23.5487	1	0.399064	0.371767
GOTERM_BP_DIRECT	GO:0071872~cellular response to epinephrine stimulus	2	1.42857	0.0811499	PDE4D, PDE4B	137	12	19357	23.5487	1	0.399064	0.371767
GOTERM_BP_DIRECT	GO:0032754~positive regulation of interleukin-5 production	2	1.42857	0.0811499	PDE4D, RARA	137	12	19357	23.5487	1	0.399064	0.371767
GOTERM_BP_DIRECT	GO:1903800~positive regulation of production of miRNAs involved in gene silencing by miRNA	2	1.42857	0.0811499	MAP2K1, EGFR	137	12	19357	23.5487	1	0.399064	0.371767
GOTERM_BP_DIRECT	GO:0009611~response to wounding	3	2.14286	0.0827112	ADORA3, RAC1, F2	137	68	19357	6.23347	1	0.405813	0.378054
GOTERM_BP_DIRECT	GO:0006909~phagocytosis	3	2.14286	0.086908	ADORA2A, MET, ELANE	137	70	19357	6.05537	1	0.413787	0.385482
GOTERM_BP_DIRECT	GO:0071300~cellular response to retinoic acid	3	2.14286	0.086908	GSK3B, RARA, PPARG	137	70	19357	6.05537	1	0.413787	0.385482
GOTERM_BP_DIRECT	GO:0045056~transcytosis	2	1.42857	0.0876096	SRC, IGF1R	137	13	19357	21.7372	1	0.413787	0.385482
GOTERM_BP_DIRECT	GO:0043114~regulation of vascular permeability	2	1.42857	0.0876096	SRC, TEK	137	13	19357	21.7372	1	0.413787	0.385482
GOTERM_BP_DIRECT	GO:0086004~regulation of cardiac muscle cell contraction	2	1.42857	0.0876096	PDE4D, PDE4B	137	13	19357	21.7372	1	0.413787	0.385482
GOTERM_BP_DIRECT	GO:0001913~T cell mediated cytotoxicity	2	1.42857	0.0876096	PRF1, HPRT1	137	13	19357	21.7372	1	0.413787	0.385482
GOTERM_BP_DIRECT	GO:1903265~positive regulation of tumor necrosis factor-mediated signaling pathway	2	1.42857	0.0876096	ADAM17, CASP1	137	13	19357	21.7372	1	0.413787	0.385482
GOTERM_BP_DIRECT	GO:0031274~positive regulation of pseudopodium assembly	2	1.42857	0.0876096	CDC42, KIT	137	13	19357	21.7372	1	0.413787	0.385482
GOTERM_BP_DIRECT	GO:0060396~growth hormone receptor signaling pathway	2	1.42857	0.0876096	JAK2, PTK2	137	13	19357	21.7372	1	0.413787	0.385482
GOTERM_BP_DIRECT	GO:0033690~positive regulation of osteoblast proliferation	2	1.42857	0.0876096	BMP2, IGF1R	137	13	19357	21.7372	1	0.413787	0.385482
GOTERM_BP_DIRECT	GO:0043568~positive regulation of insulin-like growth factor receptor signaling pathway	2	1.42857	0.0876096	AR, IGF1	137	13	19357	21.7372	1	0.413787	0.385482
GOTERM_BP_DIRECT	GO:0051450~myoblast proliferation	2	1.42857	0.0876096	SRC, IGF1	137	13	19357	21.7372	1	0.413787	0.385482
GOTERM_BP_DIRECT	GO:1903238~positive regulation of leukocyte tethering or rolling	2	1.42857	0.0876096	SELE, ELANE	137	13	19357	21.7372	1	0.413787	0.385482
GOTERM_BP_DIRECT	GO:0035313~wound healing, spreading of epidermal cells	2	1.42857	0.0876096	MMP12, ADAM17	137	13	19357	21.7372	1	0.413787	0.385482
GOTERM_BP_DIRECT	GO:1901731~positive regulation of platelet aggregation	2	1.42857	0.0876096	CTSG, JAK2	137	13	19357	21.7372	1	0.413787	0.385482
GOTERM_BP_DIRECT	GO:0019430~removal of superoxide radicals	2	1.42857	0.0876096	NOS3, SOD2	137	13	19357	21.7372	1	0.413787	0.385482
GOTERM_BP_DIRECT	GO:2000318~positive regulation of T-helper 17 type immune response	2	1.42857	0.0876096	PRKCQ, JAK2	137	13	19357	21.7372	1	0.413787	0.385482
GOTERM_BP_DIRECT	GO:0042742~defense response to bacterium	5	3.57143	0.0881995	CASP7, NOS2, LCN2, S100A9, ELANE	137	239	19357	2.9559	1	0.415659	0.387227
GOTERM_BP_DIRECT	GO:0006914~autophagy	4	2.85714	0.0927548	XBP1, LRRK2, PIK3CB, S100A9	137	153	19357	3.69391	1	0.430828	0.401357
GOTERM_BP_DIRECT	GO:0034613~cellular protein localization	3	2.14286	0.09332	CDC42, RAP2A, LRRK2	137	73	19357	5.80652	1	0.430828	0.401357
GOTERM_BP_DIRECT	GO:0050679~positive regulation of epithelial cell proliferation	3	2.14286	0.09332	IGF1, HRAS, EGFR	137	73	19357	5.80652	1	0.430828	0.401357
GOTERM_BP_DIRECT	GO:0031529~ruffle organization	2	1.42857	0.0940243	CSF1R, RAC1	137	14	19357	20.1846	1	0.430828	0.401357
GOTERM_BP_DIRECT	GO:0045778~positive regulation of ossification	2	1.42857	0.0940243	BMP2, PTPN11	137	14	19357	20.1846	1	0.430828	0.401357
GOTERM_BP_DIRECT	GO:0006691~leukotriene metabolic process	2	1.42857	0.0940243	MAPKAPK2, DPEP1	137	14	19357	20.1846	1	0.430828	0.401357
GOTERM_BP_DIRECT	GO:0051146~striated muscle cell differentiation	2	1.42857	0.0940243	CASP3, MAPK14	137	14	19357	20.1846	1	0.430828	0.401357
GOTERM_BP_DIRECT	GO:1902176~negative regulation of oxidative stress-induced intrinsic apoptotic signaling pathway	2	1.42857	0.0940243	SOD2, PPIA	137	14	19357	20.1846	1	0.430828	0.401357
GOTERM_BP_DIRECT	GO:0060317~cardiac epithelial to mesenchymal transition	2	1.42857	0.0940243	BMP2, TGFBR1	137	14	19357	20.1846	1	0.430828	0.401357
GOTERM_BP_DIRECT	GO:0030595~leukocyte chemotaxis	2	1.42857	0.0940243	CNR2, PPIA	137	14	19357	20.1846	1	0.430828	0.401357
GOTERM_BP_DIRECT	GO:0060394~negative regulation of pathway-restricted SMAD protein phosphorylation	2	1.42857	0.0940243	XBP1, PPARG	137	14	19357	20.1846	1	0.430828	0.401357
GOTERM_BP_DIRECT	GO:0010447~response to acidic pH	2	1.42857	0.0940243	SRC, CTSS	137	14	19357	20.1846	1	0.430828	0.401357
GOTERM_BP_DIRECT	GO:0070102~interleukin-6-mediated signaling pathway	2	1.42857	0.0940243	SRC, JAK2	137	14	19357	20.1846	1	0.430828	0.401357
GOTERM_BP_DIRECT	GO:0030163~protein catabolic process	3	2.14286	0.0954872	CASP3, MMP2, ELANE	137	74	19357	5.72805	1	0.4366	0.406735
GOTERM_BP_DIRECT	GO:0071333~cellular response to glucose stimulus	3	2.14286	0.0976688	XBP1, ICAM1, IGF1R	137	75	19357	5.65168	1	0.443924	0.413558
GOTERM_BP_DIRECT	GO:0009267~cellular response to starvation	3	2.14286	0.0976688	HSPA8, LRRK2, ALB	137	75	19357	5.65168	1	0.443924	0.413558
GOTERM_BP_DIRECT	GO:0071260~cellular response to mechanical stimulus	3	2.14286	0.0998646	CASP1, PTGS2, IGF1R	137	76	19357	5.57731	1	0.443924	0.413558
GOTERM_BP_DIRECT	GO:0097190~apoptotic signaling pathway	3	2.14286	0.0998646	ADORA2A, CASP3, CASP1	137	76	19357	5.57731	1	0.443924	0.413558
GOTERM_CC_DIRECT	GO:0005829~cytosol	78	55.7143	9.28322e-13	GPI, GSK3B, HSP90AB1, LRRK2, PRF1, PIK3CD, AKR1B1, PIK3CB, NR3C1, PIK3CG, IKBKB, PPP1CC, CASP7, CA2, CASP3, PDE4B, CASP1, CTSG, RAC1, JAK2, JAK3, HRAS, TGM2, SULT2A1, MAP2K1, HSP90AA1, PDE4D, ANXA5, ADRA2B, AR, ZAP70, RAP2A, ADAM17, MTHFD1, LCK, MAPKAPK2, RARA, PRKCQ, PPARG, PGR, HPRT1, S100A9, PPIA, CRABP2, ROCK2, SRC, GSTP1, XIAP, TYMS, CDC42, SEC14L2, GRK2, HMOX1, GC, ELANE, HSPA8, GSTM2, XBP1…	140	5521	20587	2.0775	2.59015e-10	2.59002e-10	2.21869e-10
GOTERM_CC_DIRECT	GO:0005576~extracellular region	43	30.7143	6.99299e-11	GPI, SERPINA1, HSP90AB1, GSTP1, PRF1, ABO, CTSS, DPP4, TTR, CCL5, CTSK, KDR, CTSG, GC, ELANE, BCHE, HSPA8, HSP90AA1, MMP2, PLA2G2A, MMP3, ANXA5, IGF1, MAPK14, MMP8, F2, IL2, PGF, MMP12, PROCR, BMP2, RBP4, MMP13, QPCT, ALB, LCN2, REN, TEK, SHBG, S100A9, MET, PPIA, FGFR1	140	2119	20587	2.98403	1.95104e-08	7.23087e-09	6.19419e-09
GOTERM_CC_DIRECT	GO:0005615~extracellular space	41	29.2857	7.77513e-11	GPI, SERPINA1, GSTP1, LRRK2, AKR1B1, EGFR, CTSS, ICAM1, CASP7, TTR, CCL5, CTSK, CASP1, HMOX1, CTSG, GC, ELANE, BCHE, HSPA8, MMP2, PLA2G2A, MMP3, IGF1, MMP8, F2, SELE, F3, IL2, PGF, MMP12, PROCR, BMP2, RBP4, MMP13, ALB, KIT, LCN2, DPEP1, REN, S100A9, PPIA	140	1946	20587	3.09818	2.16926e-08	7.23087e-09	6.19419e-09
GOTERM_CC_DIRECT	GO:0070062~extracellular exosome	43	30.7143	2.9672e-10	GPI, SERPINA1, HSP90AB1, CRABP2, SRC, GSTP1, LRRK2, AKR1B1, PTGS1, ICAM1, DPP4, CDC42, SEC14L2, TTR, CA2, CTSG, RAC1, GC, ELANE, TGM2, HSPA8, GSTM2, HSP90AA1, PLA2G2A, ANXA5, GSR, F2, SOD2, PROCR, RBP4, FABP4, MTHFD1, LCK, QPCT, ALB, MAPKAPK2, LCN2, DPEP1, HPRT1, SHBG, S100A9, PPIA	140	2219	20587	2.84955	8.27849e-08	2.06962e-08	1.7729e-08
GOTERM_CC_DIRECT	GO:0045121~membrane raft	15	10.7143	9.96966e-10	SRC, LRRK2, SELE, EGFR, TGFBR1, ICAM1, DPP4, IKBKB, ZAP70, ADAM17, LCK, CASP3, KDR, TEK, JAK2	140	241	20587	9.15249	2.78153e-07	5.56307e-08	4.7655e-08
GOTERM_CC_DIRECT	GO:0005737~cytoplasm	72	51.4286	2.44744e-09	GSK3B, HSP90AB1, LRRK2, PIK3CD, PIK3CB, NR3C1, PIK3CG, IGF1R, IKBKB, PPP1CC, CASP7, CYP2D6, CA2, CASP3, CASP1, CTSG, RAC1, JAK2, JAK3, HRAS, SULT2A1, HSP90AA1, ANXA5, MMP3, MMP12, AR, ZAP70, ADAM17, MAPKAPK2, RARA, RARB, PPARG, PGR, HPRT1, S100A9, PPIA, CRABP2, ROCK2, SRC, GSTP1, XIAP, TYMS, PTGS2, EGFR, PTGS1, CDC42, SEC14L2, GRK2, CNR2, GC, ELANE, HSPA8, GSTM2, XBP1, GSTM1, NOS2, NOS3, STAT1, V…	140	5634	20587	1.87923	6.82836e-07	1.13806e-07	9.74897e-08
GOTERM_CC_DIRECT	GO:0005925~focal adhesion	17	12.1429	3.16051e-08	HSPA8, MAP2K1, SRC, ANXA5, EGFR, PTK2, ICAM1, CDC42, DPP4, PROCR, PPP1CC, ADAM17, TEK, RAC1, JAK2, PPIA, TGM2	140	426	20587	5.86819	8.81778e-06	1.05594e-06	9.04551e-07
GOTERM_CC_DIRECT	GO:0043235~receptor complex	13	9.28571	3.16159e-08	NTRK1, CSF1R, VDR, ADRB2, EGFR, TGFBR1, IGF1R, KIT, KDR, PPARG, TEK, MET, FGFR1	140	219	20587	8.729	8.82079e-06	1.05594e-06	9.04551e-07
GOTERM_CC_DIRECT	GO:0005886~plasma membrane	67	47.8571	3.40626e-08	GPI, GSK3B, HSP90AB1, LRRK2, PRF1, PIK3CD, PIK3CB, PIK3CG, IGF1R, ICAM1, STS, CA2, ADORA3, CASP1, KDR, CTSG, RAC1, JAK2, JAK3, HRAS, TGM2, MAP2K1, HSP90AA1, PDE4D, MMP2, HTR3A, F2, ADRA2B, F3, TGFBR1, PROCR, AR, ZAP70, RAP2A, ADAM17, ADORA2A, LCK, KIT, RARA, DPEP1, PRKCQ, S100A9, MET, CSF1R, ROCK2, SRC, ADRB2, EGFR, DPP4, CDC42, GRK2, CNR2, NTRK1, BCHE, HSPA8, NOS2, NOS3, PLA2G2A, SELE, ESR1, PTK…	140	5334	20587	1.84708	9.50342e-06	1.05594e-06	9.04551e-07
GOTERM_CC_DIRECT	GO:1904813~ficolin-1-rich granule lumen	10	7.14286	1.65256e-07	HSPA8, GPI, HSP90AA1, SERPINA1, HSP90AB1, QPCT, GSTP1, MAPK14, PPIA, CTSS	140	124	20587	11.8589	4.61054e-05	4.61064e-06	3.94962e-06
GOTERM_CC_DIRECT	GO:0009986~cell surface	18	12.8571	1.44942e-06	NTRK1, CSF1R, HSP90AA1, HSP90AB1, F3, ADRA2B, EGFR, TGFBR1, ICAM1, DPP4, PROCR, BMP2, ADAM17, RARA, CTSG, TEK, MET, ELANE	140	637	20587	4.15526	0.000404306	3.67625e-05	3.14919e-05
GOTERM_CC_DIRECT	GO:0048471~perinuclear region of cytoplasm	19	13.5714	2.35045e-06	HSPA8, HSP90AA1, HSP90AB1, NOS2, STAT1, SRC, PDE4D, PLA2G2A, SELE, EGFR, PTK2, PROCR, PDE4B, RARA, HMOX1, PPARG, HRAS, PTGES, TGM2	140	735	20587	3.80129	0.000655561	5.46479e-05	4.68131e-05
GOTERM_CC_DIRECT	GO:0005901~caveola	7	5	1.16764e-05	SRC, NOS3, HMOX1, JAK2, PTGS2, SELE, IGF1R	140	75	20587	13.7247	0.00325245	0.000250594	0.000214667
GOTERM_CC_DIRECT	GO:0034774~secretory granule lumen	8	5.71429	1.31244e-05	HSPA8, GPI, HSP90AA1, HSP90AB1, GSTP1, MAPK14, PPIA, S100A9	140	115	20587	10.2296	0.00365504	0.000261551	0.000224053
GOTERM_CC_DIRECT	GO:0032991~macromolecular complex	17	12.1429	1.54697e-05	NTRK1, HSP90AA1, HSP90AB1, STAT1, PTPN11, PTGS2, NR3C1, ESR1, EGFR, CDC42, AR, PPP1CC, TTR, ALB, CASP1, RARA, PPIA	140	683	20587	3.6601	0.00430679	0.000287737	0.000246484
GOTERM_CC_DIRECT	GO:0043231~intracellular membrane-bounded organelle	20	14.2857	2.7742e-05	CSF1R, SERPINA1, LRRK2, PIK3CB, PTGS2, ADRA2B, CTSS, PTK2, PTGS1, IGF1R, MAPK10, HSD11B1, CYP2C9, BMP2, STS, CYP2D6, CTSK, CTSG, PPARG, PPIA	140	967	20587	3.04137	0.00771025	0.000483751	0.000414396
GOTERM_CC_DIRECT	GO:0005789~endoplasmic reticulum membrane	21	15	5.53734e-05	XBP1, LRRK2, PLA2G2A, TAP1, HMGCR, PTGS2, CYP19A1, EGFR, PTGS1, CDC42, HSD11B1, CYP2C9, STS, CYP2D6, ALOX5AP, HMOX1, RAC1, HRAS, PTGES	140	1108	20587	2.78705	0.0153309	0.000908775	0.000778484
GOTERM_CC_DIRECT	GO:0016020~membrane	45	32.1429	8.28152e-05	GPI, HSP90AB1, LRRK2, PRF1, PIK3CD, ADRB2, PIK3CB, NR3C1, CYP19A1, ABO, EGFR, PIK3CG, IGF1R, ICAM1, DPP4, HSD11B1, CDC42, GRK2, STS, HMOX1, CTSG, RAC1, JAK2, HRAS, JAK3, HSPA8, HSP90AA1, PDE4D, ANXA5, TAP1, F3, ESR1, TGFBR1, PGF, ADAM17, RAP2A, ADORA2A, MTHFD1, ALOX5AP, REN, MET, PPIA, PTGES, FGFR1	140	3739	20587	1.76979	0.0228415	0.00123073	0.00105428
GOTERM_CC_DIRECT	GO:0031234~extrinsic component of cytoplasmic side of plasma membrane	6	4.28571	8.3813e-05	ZAP70, CNR2, SRC, LCK, RAC1, PTK2	140	66	20587	13.3682	0.0231135	0.00123073	0.00105428
GOTERM_CC_DIRECT	GO:0098978~glutamatergic synapse	11	7.85714	0.000488246	CDC42, HSPA8, GSK3B, PPP1CC, ADORA2A, SRC, LRRK2, RAC1, JAK2, MAPK14, HRAS	140	411	20587	3.93564	0.127379	0.00681103	0.00583454
GOTERM_CC_DIRECT	GO:0005739~mitochondrion	22	15.7143	0.0006659	GSK3B, MAP2K1, HSP90AA1, HSP90AB1, SRC, GSTP1, MMP2, LRRK2, GSR, TYMS, MAPK14, SOD2, NR3C1, DHODH, MAPK10, DHFR, PPP1CC, MTHFD1, CYP2D6, TGM2	140	1440	20587	2.2466	0.1696	0.00884696	0.00757857
GOTERM_CC_DIRECT	GO:0043025~neuronal cell body	10	7.14286	0.0008849	NTRK1, CDC42, HSP90AA1, HSP90AB1, CNR2, ADORA2A, SRC, CASP3, LRRK2, IGF1R	140	367	20587	4.00681	0.218856	0.0112221	0.00961323
GOTERM_CC_DIRECT	GO:0008303~caspase complex	3	2.14286	0.000929613	CASP7, CASP3, CASP1	140	7	20587	63.0214	0.228549	0.0112766	0.00965989
GOTERM_CC_DIRECT	GO:0005943~phosphatidylinositol 3-kinase complex, class IA	3	2.14286	0.00157955	PIK3CD, PIK3CB, PIK3CG	140	9	20587	49.0167	0.356635	0.0172039	0.0147374
GOTERM_CC_DIRECT	GO:0044294~dendritic growth cone	3	2.14286	0.00157955	HSP90AA1, HSP90AB1, SRC	140	9	20587	49.0167	0.356635	0.0172039	0.0147374
GOTERM_CC_DIRECT	GO:0005887~integral component of plasma membrane	21	15	0.00160323	NTRK1, CSF1R, TAP1, HTR3A, ADRB2, SELE, F3, ADRA2B, EGFR, ICAM1, IGF1R, PROCR, ADAM17, ADORA2A, CNR2, ADORA3, KIT, KDR, TEK, MET, FGFR1	140	1438	20587	2.14746	0.360879	0.0172039	0.0147374
GOTERM_CC_DIRECT	GO:0005783~endoplasmic reticulum	18	12.8571	0.00184017	MAP2K1, XBP1, SERPINA1, CRABP2, LRRK2, PLA2G2A, TAP1, HMGCR, PTGS2, CYP19A1, STS, CNR2, CYP2D6, ALOX5AP, ALB, KDR, HMOX1, TGM2	140	1144	20587	2.31372	0.40183	0.0190151	0.0162889
GOTERM_CC_DIRECT	GO:0005654~nucleoplasm	42	30	0.00231247	GPI, CSF1R, GSK3B, HSP90AB1, CRABP2, SRC, NR1I2, XIAP, AKR1B1, PIK3CB, NR3C1, SEC14L2, PPP1CC, CASP7, CASP3, CTSK, HMOX1, JAK2, HRAS, HSPA8, XBP1, HSP90AA1, NOS2, STAT1, VDR, PTPN11, MAPK14, ESR1, DHODH, MAPK10, AR, CDK6, CDK4, MAPKAPK2, CDK2, RARA, DPEP1, RARB, PPARG, PGR, MET, S100A9	140	3962	20587	1.55883	0.475823	0.0230421	0.0197386
GOTERM_CC_DIRECT	GO:0001772~immunological synapse	4	2.85714	0.00347397	ZAP70, LCK, PRKCQ, ICAM1	140	45	20587	13.0711	0.621268	0.033422	0.0286303
GOTERM_CC_DIRECT	GO:0016324~apical plasma membrane	9	6.42857	0.00420239	DPP4, ADAM17, HSP90AA1, HSP90AB1, PDE4D, CTSK, DPEP1, TEK, ADRB2	140	378	20587	3.50119	0.691162	0.0390822	0.033479
GOTERM_CC_DIRECT	GO:0043202~lysosomal lumen	5	3.57143	0.0044036	HSPA8, HSP90AA1, CTSK, GC, CTSS	140	98	20587	7.50255	0.708092	0.0396324	0.0339504
GOTERM_CC_DIRECT	GO:0005634~nucleus	56	40	0.00508274	GSK3B, HSP90AB1, PIK3CB, NR3C1, IGF1R, IKBKB, PPP1CC, CASP7, CASP3, PDE4B, KDR, CTSG, RAC1, JAK2, TGM2, MAP2K1, HSP90AA1, PDE4D, MMP2, MMP3, TGFBR1, MMP12, AR, MAPKAPK2, RARA, RARB, PPARG, S100A9, MET, PPIA, CRABP2, ROCK2, GSTP1, XIAP, ADRB2, TYMS, EGFR, SEC14L2, HMOX1, HSPA8, XBP1, NOS2, NOS3, STAT1, VDR, PTPN11, MAPK14, ESR1, PTK2, MAPK10, FABP4, CDK6, CDK4, ALB, CDK2, FGFR1	140	5991	20587	1.37453	0.758697	0.0436703	0.0374093
GOTERM_CC_DIRECT	GO:0005764~lysosome	8	5.71429	0.0051653	HSPA8, STS, SRC, CTSK, LRRK2, CTSG, ADRB2, CTSS	140	310	20587	3.79484	0.76422	0.0436703	0.0374093
GOTERM_CC_DIRECT	GO:0005768~endosome	8	5.71429	0.00581924	STS, LRRK2, CDK2, KDR, ADRB2, JAK3, EGFR, TGFBR1	140	317	20587	3.71104	0.803739	0.047752	0.0409058
GOTERM_CC_DIRECT	GO:0035580~specific granule lumen	4	2.85714	0.00852016	QPCT, LCN2, MMP8, ELANE	140	62	20587	9.4871	0.908124	0.0679179	0.0581806
GOTERM_CC_DIRECT	GO:0005942~phosphatidylinositol 3-kinase complex	3	2.14286	0.00956995	PIK3CD, PIK3CB, PIK3CG	140	22	20587	20.0523	0.931634	0.0733694	0.0628505
GOTERM_CC_DIRECT	GO:0090575~RNA polymerase II transcription factor complex	5	3.57143	0.00972999	XBP1, STAT1, VDR, RARA, PPARG	140	123	20587	5.97764	0.934648	0.0733694	0.0628505
GOTERM_CC_DIRECT	GO:0030425~dendrite	9	6.42857	0.0105281	NTRK1, HSPA8, GSK3B, CNR2, ADORA2A, STAT1, ADORA3, LRRK2, RARA	140	443	20587	2.98747	0.947812	0.0772981	0.0662159
GOTERM_CC_DIRECT	GO:0045177~apical part of cell	4	2.85714	0.0132808	CDC42, CA2, DPEP1, REN	140	73	20587	8.05753	0.976011	0.0930217	0.0796853
GOTERM_CC_DIRECT	GO:0098794~postsynapse	5	3.57143	0.0133364	GSK3B, GRK2, LRRK2, RAC1, JAK2	140	135	20587	5.4463	0.976386	0.0930217	0.0796853
GOTERM_CC_DIRECT	GO:0009897~external side of plasma membrane	9	6.42857	0.0163689	CTSK, ANXA5, KIT, GSR, KDR, F2, SELE, F3, ICAM1	140	480	20587	2.75719	0.989995	0.111388	0.0954187
GOTERM_CC_DIRECT	GO:0072562~blood microparticle	5	3.57143	0.0169112	HSPA8, BCHE, ALB, F2, GC	140	145	20587	5.07069	0.991422	0.112339	0.0962327
GOTERM_CC_DIRECT	GO:0005788~endoplasmic reticulum lumen	7	5	0.0178197	BCHE, ADAM17, SERPINA1, STS, ALB, F2, PTGS2	140	306	20587	3.36389	0.993373	0.115621	0.0990445
GOTERM_CC_DIRECT	GO:0005770~late endosome	5	3.57143	0.0201966	NTRK1, HSPA8, MAP2K1, SRC, CTSS	140	153	20587	4.80556	0.996629	0.128065	0.109704
GOTERM_CC_DIRECT	GO:0030054~cell junction	6	4.28571	0.0217781	DPP4, SRC, KDR, DPEP1, S100A9, EGFR	140	235	20587	3.75447	0.997852	0.132115	0.113174
GOTERM_CC_DIRECT	GO:0043197~dendritic spine	5	3.57143	0.0217824	CDC42, PPP1CC, PDE4B, RAC1, PTK2	140	157	20587	4.68312	0.997855	0.132115	0.113174
GOTERM_CC_DIRECT	GO:0005815~microtubule organizing center	5	3.57143	0.0223795	CDC42, MAP2K1, ROCK2, PDE4D, NR3C1	140	158	20587	4.65348	0.998191	0.132848	0.113802
GOTERM_CC_DIRECT	GO:0035867~alphav-beta3 integrin-IGF-1-IGF1R complex	2	1.42857	0.026737	IGF1, IGF1R	140	4	20587	73.525	0.99948	0.155408	0.133127
GOTERM_CC_DIRECT	GO:0030141~secretory granule	4	2.85714	0.0272938	CDC42, PLA2G2A, CTSG, ELANE	140	96	20587	6.12708	0.999557	0.155408	0.133127
GOTERM_CC_DIRECT	GO:0032587~ruffle membrane	4	2.85714	0.0310766	ADAM17, SRC, RAC1, EGFR	140	101	20587	5.82376	0.99985	0.171464	0.146881
GOTERM_CC_DIRECT	GO:0031012~extracellular matrix	6	4.28571	0.0313428	MMP12, MMP13, MMP2, MMP3, MMP8, TGM2	140	259	20587	3.40656	0.999861	0.171464	0.146881
GOTERM_CC_DIRECT	GO:0036021~endolysosome lumen	2	1.42857	0.0333096	CTSK, CTSS	140	5	20587	58.82	0.999921	0.1762	0.150938
GOTERM_CC_DIRECT	GO:0042470~melanosome	4	2.85714	0.0334716	HSPA8, HSP90AA1, HSP90AB1, RAC1	140	104	20587	5.65577	0.999925	0.1762	0.150938
GOTERM_CC_DIRECT	GO:0000307~cyclin-dependent protein kinase holoenzyme complex	3	2.14286	0.0341252	CDK6, CDK4, CDK2	140	43	20587	10.2593	0.999938	0.176314	0.151036
GOTERM_CC_DIRECT	GO:0043005~neuron projection	7	5	0.0381106	CDC42, GPI, SRC, LRRK2, HTR3A, PTGS2, PTGS1	140	366	20587	2.81243	0.99998	0.193325	0.165608
GOTERM_CC_DIRECT	GO:0005911~cell-cell junction	5	3.57143	0.0407135	CDC42, ZAP70, ADAM17, KIT, TEK	140	191	20587	3.84948	0.999991	0.202841	0.173759
GOTERM_CC_DIRECT	GO:0005741~mitochondrial outer membrane	5	3.57143	0.0497168	PPP1CC, LRRK2, PLA2G2A, HMOX1, PGR	140	204	20587	3.60417	0.999999	0.243351	0.208462
GOTERM_CC_DIRECT	GO:1904724~tertiary granule lumen	3	2.14286	0.0532742	QPCT, MMP8, CTSS	140	55	20587	8.02091	1	0.256267	0.219526
GOTERM_CC_DIRECT	GO:0005856~cytoskeleton	8	5.71429	0.0575268	PPP1CC, ROCK2, NOS3, RAC1, JAK2, JAK3, S100A9, PTK2	140	509	20587	2.3112	1	0.272034	0.233032
GOTERM_CC_DIRECT	GO:0005641~nuclear envelope lumen	2	1.42857	0.0655173	BCHE, PTGES	140	10	20587	29.41	1	0.304655	0.260977
GOTERM_CC_DIRECT	GO:0009925~basal plasma membrane	3	2.14286	0.0714725	TEK, MET, EGFR	140	65	20587	6.78692	1	0.322297	0.276089
GOTERM_CC_DIRECT	GO:0005667~transcription factor complex	5	3.57143	0.0716215	CDK4, NR1I2, CDK2, RARA, ESR1	140	231	20587	3.1829	1	0.322297	0.276089
GOTERM_CC_DIRECT	GO:0031093~platelet alpha granule lumen	3	2.14286	0.0753242	SERPINA1, ALB, IGF1	140	67	20587	6.58433	1	0.333578	0.285754
GOTERM_CC_DIRECT	GO:0045335~phagocytic vesicle	3	2.14286	0.0812224	CDC42, CTSS, ELANE	140	70	20587	6.30214	1	0.347241	0.297457
GOTERM_CC_DIRECT	GO:0099523~presynaptic cytosol	2	1.42857	0.0843282	HSPA8, LRRK2	140	13	20587	22.6231	1	0.347241	0.297457
GOTERM_CC_DIRECT	GO:1990909~Wnt signalosome	2	1.42857	0.0843282	GSK3B, LRRK2	140	13	20587	22.6231	1	0.347241	0.297457
GOTERM_CC_DIRECT	GO:0005813~centrosome	8	5.71429	0.0843673	CDC42, PROCR, GSK3B, CDK6, ROCK2, CDK2, MAPKAPK2, PDE4B	140	558	20587	2.10824	1	0.347241	0.297457
GOTERM_CC_DIRECT	GO:0016323~basolateral plasma membrane	5	3.57143	0.0846323	HSP90AA1, HSP90AB1, LRRK2, TEK, EGFR	140	245	20587	3.00102	1	0.347241	0.297457
GOTERM_MF_DIRECT	GO:0004712~protein serine/threonine/tyrosine kinase activity	27	19.2857	1.41958e-16	CSF1R, GSK3B, ROCK2, SRC, LRRK2, EGFR, PIK3CG, IGF1R, IKBKB, KDR, JAK2, JAK3, NTRK1, MAP2K1, MAPK14, PTK2, ZAP70, CDK6, LCK, CDK4, KIT, MAPKAPK2, CDK2, PRKCQ, TEK, MET, FGFR1	140	440	18913	8.28979	5.75096e-14	7.35344e-14	6.31714e-14
GOTERM_MF_DIRECT	GO:0004713~protein tyrosine kinase activity	16	11.4286	3.85991e-15	NTRK1, CSF1R, MAP2K1, SRC, EGFR, PTK2, IGF1R, ZAP70, LCK, KIT, KDR, TEK, JAK2, JAK3, MET, FGFR1	140	112	18913	19.299	2.01283e-12	9.99718e-13	8.58831e-13
GOTERM_MF_DIRECT	GO:0004672~protein kinase activity	23	16.4286	5.74874e-14	NTRK1, GSK3B, MAP2K1, ROCK2, SRC, LRRK2, MAPK14, EGFR, TGFBR1, PIK3CG, PTK2, MAPK10, IKBKB, GRK2, CDK4, CCL5, MAPKAPK2, CDK2, PRKCQ, TEK, JAK2, MET	140	378	18913	8.21994	2.97899e-11	9.92616e-12	8.5273e-12
GOTERM_MF_DIRECT	GO:0019899~enzyme binding	22	15.7143	6.1546e-13	BCHE, HSPA8, GSTM2, HSP90AA1, GSTM1, HSP90AB1, STAT1, SRC, PDE4D, PTGS2, MAPK14, SOD2, ESR1, EGFR, AR, ADORA2A, ALOX5AP, RARA, HMOX1, PGR, PPARG, RAC1	140	380	18913	7.82117	3.18833e-10	7.97021e-11	6.84699e-11
GOTERM_MF_DIRECT	GO:0005524~ATP binding	39	27.8571	1.47619e-11	CSF1R, GSK3B, HSP90AB1, ROCK2, SRC, LRRK2, PIK3CD, PIK3CB, EGFR, PIK3CG, IGF1R, IKBKB, GRK2, KDR, JAK2, JAK3, TGM2, NTRK1, HSPA8, MAP2K1, HSP90AA1, TAP1, MAPK14, TGFBR1, PTK2, MAPK10, ZAP70, CDK6, MTHFD1, LCK, CDK4, KIT, MAPKAPK2, CDK2, PRKCQ, TEK, MET, FGFR1	140	1539	18913	3.42341	7.64664e-09	1.52933e-09	1.31381e-09
GOTERM_MF_DIRECT	GO:0042802~identical protein binding	38	27.1429	1.02344e-09	SERPINA1, HSP90AB1, LRRK2, PRF1, XIAP, ADRB2, NR3C1, EGFR, PIK3CG, IGF1R, DPP4, IKBKB, CDC42, TTR, CCL5, CASP1, KDR, HMOX1, JAK2, NTRK1, BCHE, XBP1, HSP90AA1, STAT1, SOD2, ESR1, PGF, ADORA2A, LCK, ALB, ALOX5AP, LCN2, PPARG, PGR, TEK, HPRT1, MET, FGFR1	140	1698	18913	3.02328	5.30142e-07	8.8357e-08	7.59052e-08
GOTERM_MF_DIRECT	GO:0004714~transmembrane receptor protein tyrosine kinase activity	9	6.42857	4.66127e-09	NTRK1, CSF1R, KIT, KDR, TEK, MET, EGFR, FGFR1, IGF1R	140	53	18913	22.9403	2.41454e-06	3.44934e-07	2.96324e-07
GOTERM_MF_DIRECT	GO:0004879~RNA polymerase II transcription factor activity, ligand-activated sequence-specific DNA binding	9	6.42857	5.43827e-09	AR, VDR, NR1I2, RARA, RARB, PGR, PPARG, NR3C1, ESR1	140	54	18913	22.5155	2.81702e-06	3.52128e-07	3.02504e-07
GOTERM_MF_DIRECT	GO:0020037~heme binding	12	8.57143	1.73879e-08	CYP2C9, NOS2, CYP2D6, SRC, NOS3, HMOX1, JAK2, PTGS2, CYP19A1, PTGS1	140	153	18913	10.5955	9.00689e-06	1.00077e-06	8.59735e-07
GOTERM_MF_DIRECT	GO:0004252~serine-type endopeptidase activity	12	8.57143	1.44561e-07	MMP12, DPP4, MMP13, MMP2, CTSK, MMP3, CTSG, F2, MMP8, F3, CTSS, ELANE	140	188	18913	8.62295	7.488e-05	7.48828e-06	6.43299e-06
GOTERM_MF_DIRECT	GO:0019903~protein phosphatase binding	9	6.42857	3.24508e-07	CSF1R, HSP90AA1, LCK, PPARG, MAPK14, JAK3, MET, PTK2, EGFR	140	90	18913	13.5093	0.000168081	1.52814e-05	1.31278e-05
GOTERM_MF_DIRECT	GO:0042803~protein homodimerization activity	21	15	3.75879e-07	NTRK1, CSF1R, GSTM2, XBP1, HSP90AA1, GSTM1, HSP90AB1, NOS2, STAT1, LRRK2, TAP1, ADRB2, TYMS, PTGS2, DPP4, HSD11B1, IKBKB, CCL5, KIT, HMOX1, FGFR1	140	728	18913	3.89691	0.000194686	1.62254e-05	1.39388e-05
GOTERM_MF_DIRECT	GO:0050661~NADP binding	7	5	5.96714e-07	DHFR, HSD11B1, NOS2, NOS3, GSR, HMGCR	140	42	18913	22.5155	0.00030905	2.37768e-05	2.0426e-05
GOTERM_MF_DIRECT	GO:0008233~peptidase activity	9	6.42857	1.06422e-06	ADAM17, CASP7, CASP3, MMP3, REN, CTSG, MMP8, ELANE, TGM2	140	105	18913	11.5794	0.000551116	3.93763e-05	3.38271e-05
GOTERM_MF_DIRECT	GO:0004175~endopeptidase activity	8	5.71429	1.5586e-06	MMP12, ADAM17, MMP13, MMP2, MMP3, CASP1, MMP8, ELANE	140	77	18913	14.0356	0.000807032	5.38238e-05	4.62386e-05
GOTERM_MF_DIRECT	GO:0005102~receptor binding	15	10.7143	1.91896e-06	GSTM2, SRC, LRRK2, F2, TGFBR1, PTK2, DPP4, AR, ZAP70, BMP2, LCK, RARA, REN, PGR, JAK2	140	408	18913	4.96665	0.000993526	6.21262e-05	5.3371e-05
GOTERM_MF_DIRECT	GO:0005496~steroid binding	6	4.28571	2.45208e-06	HSD11B1, AR, PGR, NR3C1, SHBG, ESR1	140	30	18913	27.0186	0.00126937	7.47162e-05	6.41867e-05
GOTERM_MF_DIRECT	GO:0016004~phospholipase activator activity	5	3.57143	7.89203e-06	SRC, LCK, CCL5, F2, EGFR	140	18	18913	37.5258	0.00407975	0.000227115	0.000195109
GOTERM_MF_DIRECT	GO:0002020~protease binding	8	5.71429	1.58881e-05	DPP4, GSK3B, XBP1, SERPINA1, CASP3, KIT, F3, ELANE	140	109	18913	9.91507	0.00819632	0.00043316	0.000372116
GOTERM_MF_DIRECT	GO:0004715~non-membrane spanning protein tyrosine kinase activity	6	4.28571	1.92424e-05	ZAP70, SRC, LCK, JAK2, JAK3, PTK2	140	45	18913	18.0124	0.00991813	0.000498377	0.000428143
GOTERM_MF_DIRECT	GO:0030235~nitric-oxide synthase regulator activity	4	2.85714	2.11764e-05	HSP90AA1, HSP90AB1, ESR1, EGFR	140	8	18913	67.5464	0.0109096	0.000522352	0.000448739
GOTERM_MF_DIRECT	GO:0004674~protein serine/threonine kinase activity	13	9.28571	3.75807e-05	GSK3B, MAP2K1, ROCK2, LRRK2, MAPK14, TGFBR1, PIK3CG, MAPK10, IKBKB, CDK4, MAPKAPK2, CDK2, PRKCQ	140	397	18913	4.4237	0.0192789	0.000884855	0.000760156
GOTERM_MF_DIRECT	GO:0051117~ATPase binding	7	5	4.10392e-05	AR, SRC, LCK, PDE4D, PGR, ESR1, EGFR	140	86	18913	10.9959	0.0210344	0.000890894	0.000765343
GOTERM_MF_DIRECT	GO:0005515~protein binding	115	82.1429	4.26683e-05	PRF1, NR3C1, ICAM1, IGF1R, PPP1CC, KDR, TGM2, SULT2A1, MAP2K1, TAP1, PGF, PROCR, AR, RBP4, ADAM17, MTHFD1, MAPKAPK2, DPEP1, PGR, PRKCQ, HPRT1, PPIA, S100A9, PTGES, CSF1R, CRABP2, ADRB2, DPP4, GRK2, HMOX1, ELANE, HSPA8, XBP1, GSTM2, VDR, IGF1, SELE, ESR1, PTK2, IL2, BMP2, CDK6, CDK4, ALB, CDK2, LCN2, REN, SHBG, FGFR1, GPI, GSK3B, SERPINA1, HSP90AB1, LRRK2, PIK3CD, AKR1B1, PIK3CB, PIK3CG, IKBKB, CA…	140	12623	18913	1.23074	0.0218602	0.000890894	0.000765343
GOTERM_MF_DIRECT	GO:0004364~glutathione transferase activity	5	3.57143	4.29968e-05	GSTM2, GSTM1, GSTP1, ALOX5AP, PTGES	140	27	18913	25.0172	0.0220266	0.000890894	0.000765343
GOTERM_MF_DIRECT	GO:0070330~aromatase activity	5	3.57143	6.60027e-05	CYP2C9, CYP2D6, CYP19A1	140	30	18913	22.5155	0.0336127	0.00131498	0.00112966
GOTERM_MF_DIRECT	GO:0008270~zinc ion binding	19	13.5714	6.98969e-05	VDR, MMP2, NR1I2, MMP3, NR3C1, MMP8, ESR1, MMP12, AR, MMP13, CA2, QPCT, ALB, RARA, DPEP1, RARB, PGR, PPARG, S100A9	140	870	18913	2.9503	0.0355602	0.00134099	0.001152
GOTERM_MF_DIRECT	GO:0097110~scaffold protein binding	6	4.28571	0.000133636	IKBKB, MAP2K1, HSP90AA1, SRC, NOS3, PDE4D	140	67	18913	12.0979	0.0668863	0.00244893	0.00210381
GOTERM_MF_DIRECT	GO:0005504~fatty acid binding	5	3.57143	0.000137102	GSTM2, FABP4, CRABP2, GSTP1, ALB	140	36	18913	18.7629	0.0685602	0.00244893	0.00210381
GOTERM_MF_DIRECT	GO:0042169~SH2 domain binding	5	3.57143	0.000229097	SRC, LCK, KIT, JAK2, PTK2	140	41	18913	16.4747	0.111913	0.00395575	0.00339828
GOTERM_MF_DIRECT	GO:0000900~translation repressor activity, nucleic acid binding	4	2.85714	0.00024496	DHFR, RARA, TYMS	140	17	18913	31.7866	0.119182	0.0040932	0.00351636
GOTERM_MF_DIRECT	GO:0001223~transcription coactivator binding	5	3.57143	0.000358822	AR, STAT1, RARA, PGR, ESR1	140	46	18913	14.684	0.169646	0.00580844	0.00498987
GOTERM_MF_DIRECT	GO:0019901~protein kinase binding	13	9.28571	0.000432792	GSK3B, XBP1, HSP90AB1, PTPN11, NR3C1, ESR1, PTK2, CDC42, IKBKB, PPP1CC, LCK, RAC1, JAK2	140	516	18913	3.4035	0.200873	0.00679353	0.00583614
GOTERM_MF_DIRECT	GO:0035004~phosphatidylinositol 3-kinase activity	3	2.14286	0.000528557	PIK3CD, PIK3CB, PIK3CG	140	5	18913	81.0557	0.239565	0.00799254	0.00686618
GOTERM_MF_DIRECT	GO:0004602~glutathione peroxidase activity	4	2.85714	0.000540037	GSTM2, GSTP1, ALOX5AP, PTGES	140	22	18913	24.5623	0.244076	0.00799254	0.00686618
GOTERM_MF_DIRECT	GO:0016712~oxidoreductase activity, acting on paired donors, with incorporation or reduction of molecular oxygen, reduced flavin or flavoprotein as one donor, and incorporation of one atom of oxygen	4	2.85714	0.000617713	CYP2C9, CYP2D6, CYP19A1	140	23	18913	23.4944	0.273905	0.00864798	0.00742925
GOTERM_MF_DIRECT	GO:0005158~insulin receptor binding	4	2.85714	0.000617713	SRC, PTPN11, IGF1, IGF1R	140	23	18913	23.4944	0.273905	0.00864798	0.00742925
GOTERM_MF_DIRECT	GO:0050544~arachidonic acid binding	3	2.14286	0.0010993	ALOX5AP, PPARG, S100A9	140	7	18913	57.8969	0.434332	0.0139987	0.012026
GOTERM_MF_DIRECT	GO:0046934~phosphatidylinositol-4,5-bisphosphate 3-kinase activity	3	2.14286	0.0010993	PIK3CD, PIK3CB, PIK3CG	140	7	18913	57.8969	0.434332	0.0139987	0.012026
GOTERM_MF_DIRECT	GO:0035005~1-phosphatidylinositol-4-phosphate 3-kinase activity	3	2.14286	0.0010993	PIK3CD, PIK3CB, PIK3CG	140	7	18913	57.8969	0.434332	0.0139987	0.012026
GOTERM_MF_DIRECT	GO:0005178~integrin binding	7	5	0.00110801	ADAM17, SRC, KDR, IGF1, PPIA, PTK2, ICAM1	140	158	18913	5.98513	0.436882	0.0139987	0.012026
GOTERM_MF_DIRECT	GO:0016301~kinase activity	8	5.71429	0.00128723	GSK3B, CDK4, LRRK2, PIK3CD, PIK3CB, JAK2, EGFR, PIK3CG	140	222	18913	4.86821	0.486863	0.0158758	0.0136385
GOTERM_MF_DIRECT	GO:0052812~phosphatidylinositol-3,4-bisphosphate 5-kinase activity	3	2.14286	0.0018664	PIK3CD, PIK3CB, PIK3CG	140	9	18913	45.031	0.620044	0.0224837	0.0193151
GOTERM_MF_DIRECT	GO:0030332~cyclin binding	4	2.85714	0.00214055	CDK6, CRABP2, CDK4, CDK2	140	35	18913	15.4392	0.670439	0.0250656	0.0215332
GOTERM_MF_DIRECT	GO:0004222~metalloendopeptidase activity	6	4.28571	0.00223199	MMP12, ADAM17, MMP13, MMP2, MMP3, MMP8	140	124	18913	6.53675	0.685718	0.0250656	0.0215332
GOTERM_MF_DIRECT	GO:0043295~glutathione binding	3	2.14286	0.00232178	GSTM2, GSTM1, PTGES	140	10	18913	40.5279	0.700033	0.0250656	0.0215332
GOTERM_MF_DIRECT	GO:0016303~1-phosphatidylinositol-3-kinase activity	3	2.14286	0.00232178	PIK3CD, PIK3CB, PIK3CG	140	10	18913	40.5279	0.700033	0.0250656	0.0215332
GOTERM_MF_DIRECT	GO:0019838~growth factor binding	4	2.85714	0.00232268	CSF1R, KIT, KDR, TGFBR1	140	36	18913	15.0103	0.700173	0.0250656	0.0215332
GOTERM_MF_DIRECT	GO:0008022~protein C-terminus binding	7	5	0.0029039	PPP1CC, MAP2K1, SRC, LCK, PPARG, JAK2, HRAS	140	191	18913	4.95105	0.778295	0.0306984	0.0263721
GOTERM_MF_DIRECT	GO:0052742~phosphatidylinositol kinase activity	3	2.14286	0.00337263	PIK3CD, PIK3CB, PIK3CG	140	12	18913	33.7732	0.826221	0.0348712	0.029957
GOTERM_MF_DIRECT	GO:0044325~ion channel binding	6	4.28571	0.00343327	HSP90AA1, HSP90AB1, SRC, PDE4D, LRRK2, PDE4B	140	137	18913	5.91648	0.831614	0.0348712	0.029957
GOTERM_MF_DIRECT	GO:0030331~estrogen receptor binding	4	2.85714	0.00361663	XBP1, SRC, PPARG, ESR1	140	42	18913	12.866	0.846923	0.0360272	0.03095
GOTERM_MF_DIRECT	GO:0043565~sequence-specific DNA binding	9	6.42857	0.00382306	MMP12, AR, VDR, NR1I2, PGR, PPARG, NR3C1, MET, ESR1	140	342	18913	3.55508	0.862501	0.0366919	0.031521
GOTERM_MF_DIRECT	GO:0048156~tau protein binding	4	2.85714	0.00386718	GSK3B, HSP90AA1, HSP90AB1, ROCK2	140	43	18913	12.5668	0.86562	0.0366919	0.031521
GOTERM_MF_DIRECT	GO:0005542~folic acid binding	3	2.14286	0.00396669	DHFR, TYMS	140	13	18913	31.1753	0.872397	0.0366919	0.031521
GOTERM_MF_DIRECT	GO:0043560~insulin receptor substrate binding	3	2.14286	0.00396669	PIK3CB, JAK2, IGF1R	140	13	18913	31.1753	0.872397	0.0366919	0.031521
GOTERM_MF_DIRECT	GO:0005506~iron ion binding	6	4.28571	0.0042433	CYP2C9, CYP2D6, LCN2, CYP19A1	140	144	18913	5.62887	0.889496	0.038562	0.0331275
GOTERM_MF_DIRECT	GO:1990825~sequence-specific mRNA binding	3	2.14286	0.0046056	DHFR, TYMS	140	14	18913	28.9485	0.908481	0.0411327	0.035336
GOTERM_MF_DIRECT	GO:0070402~NADPH binding	3	2.14286	0.00601521	DHFR, HMGCR	140	16	18913	25.3299	0.956076	0.0519313	0.0446128
GOTERM_MF_DIRECT	GO:0051393~alpha-actinin binding	3	2.14286	0.00601521	ADORA2A, RARA, PPARG	140	16	18913	25.3299	0.956076	0.0519313	0.0446128
GOTERM_MF_DIRECT	GO:0004197~cysteine-type endopeptidase activity	5	3.57143	0.00635635	CASP7, CASP3, CTSK, CASP1, CTSS	140	100	18913	6.75464	0.963231	0.0539769	0.0463701
GOTERM_MF_DIRECT	GO:0019900~kinase binding	5	3.57143	0.00681175	NTRK1, HSP90AB1, SRC, CASP1, EGFR	140	102	18913	6.6222	0.971003	0.0569111	0.0488908
GOTERM_MF_DIRECT	GO:0004708~MAP kinase kinase activity	3	2.14286	0.0075961	MAPK10, MAP2K1, MAPK14	140	18	18913	22.5155	0.980741	0.0624568	0.053655
GOTERM_MF_DIRECT	GO:0008083~growth factor activity	6	4.28571	0.00786867	GPI, BMP2, IGF1, F2, IL2, PGF	140	167	18913	4.85364	0.983296	0.0636871	0.0547119
GOTERM_MF_DIRECT	GO:0043548~phosphatidylinositol 3-kinase binding	3	2.14286	0.00844913	LCK, JAK2, IGF1R	140	19	18913	21.3305	0.987664	0.0673331	0.057844
GOTERM_MF_DIRECT	GO:0016705~oxidoreductase activity, acting on paired donors, with incorporation or reduction of molecular oxygen	4	2.85714	0.00979556	CYP2C9, CYP2D6, CYP19A1	140	60	18913	9.00619	0.993898	0.0768803	0.0660459
GOTERM_MF_DIRECT	GO:0008656~cysteine-type endopeptidase activator activity involved in apoptotic process	3	2.14286	0.0112509	CTSK, CASP1, CTSS	140	22	18913	18.4218	0.997152	0.0869842	0.0747258
GOTERM_MF_DIRECT	GO:0043539~protein serine/threonine kinase activator activity	4	2.85714	0.0116761	MAP2K1, BMP2, F2, HRAS	140	64	18913	8.4433	0.997721	0.0889446	0.07641
GOTERM_MF_DIRECT	GO:0043274~phospholipase binding	3	2.14286	0.0122635	SRC, LCK, SELE	140	23	18913	17.6208	0.998325	0.0920653	0.0790909
GOTERM_MF_DIRECT	GO:0005518~collagen binding	4	2.85714	0.0132135	MMP12, MMP13, CTSK, CTSS	140	67	18913	8.06525	0.998982	0.0977801	0.0840003
GOTERM_MF_DIRECT	GO:0032564~dATP binding	2	1.42857	0.0146453	HSP90AA1, HSP90AB1	140	2	18913	135.093	0.99952	0.102517	0.0880694
GOTERM_MF_DIRECT	GO:0002135~CTP binding	2	1.42857	0.0146453	HSP90AA1, HSP90AB1	140	2	18913	135.093	0.99952	0.102517	0.0880694
GOTERM_MF_DIRECT	GO:1903981~enterobactin binding	2	1.42857	0.0146453	ALB, LCN2	140	2	18913	135.093	0.99952	0.102517	0.0880694
GOTERM_MF_DIRECT	GO:0004666~prostaglandin-endoperoxide synthase activity	2	1.42857	0.0146453	PTGS2, PTGS1	140	2	18913	135.093	0.99952	0.102517	0.0880694
GOTERM_MF_DIRECT	GO:0044877~macromolecular complex binding	8	5.71429	0.015829	PPP1CC, TTR, ADORA2A, CASP3, ALOX5AP, RAC1, ADRB2, PGF	140	354	18913	3.05295	0.999743	0.109326	0.0939188
GOTERM_MF_DIRECT	GO:0023026~MHC class II protein complex binding	3	2.14286	0.0178901	HSPA8, HSP90AA1, HSP90AB1	140	28	18913	14.4742	0.999913	0.121935	0.104751
GOTERM_MF_DIRECT	GO:0004497~monooxygenase activity	4	2.85714	0.0191384	CYP2C9, CYP2D6, CYP19A1	140	77	18913	7.01781	0.999955	0.128749	0.110605
GOTERM_MF_DIRECT	GO:0004693~cyclin-dependent protein serine/threonine kinase activity	3	2.14286	0.0203925	CDK6, CDK4, CDK2	140	30	18913	13.5093	0.999977	0.135427	0.116342
GOTERM_MF_DIRECT	GO:0004146~dihydrofolate reductase activity	2	1.42857	0.0218878	DHFR	140	3	18913	90.0619	0.999989	0.138267	0.118782
GOTERM_MF_DIRECT	GO:0004517~nitric-oxide synthase activity	2	1.42857	0.0218878	NOS2, NOS3	140	3	18913	90.0619	0.999989	0.138267	0.118782
GOTERM_MF_DIRECT	GO:0002134~UTP binding	2	1.42857	0.0218878	HSP90AA1, HSP90AB1	140	3	18913	90.0619	0.999989	0.138267	0.118782
GOTERM_MF_DIRECT	GO:0017098~sulfonylurea receptor binding	2	1.42857	0.0218878	HSP90AA1, HSP90AB1	140	3	18913	90.0619	0.999989	0.138267	0.118782
GOTERM_MF_DIRECT	GO:0003700~transcription factor activity, sequence-specific DNA binding	10	7.14286	0.0221884	AR, XBP1, STAT1, VDR, NR1I2, RARA, PGR, PPARG, NR3C1, ESR1	140	558	18913	2.42102	0.999991	0.138477	0.118962
GOTERM_MF_DIRECT	GO:0001968~fibronectin binding	3	2.14286	0.0230317	MMP2, CTSK, CTSS	140	32	18913	12.665	0.999994	0.142029	0.122013
GOTERM_MF_DIRECT	GO:0008395~steroid hydroxylase activity	3	2.14286	0.0244013	CYP2C9, CYP2D6, CYP19A1	140	33	18913	12.2812	0.999997	0.148704	0.127748
GOTERM_MF_DIRECT	GO:0031625~ubiquitin protein ligase binding	7	5	0.0256833	HSPA8, GSK3B, GPI, XBP1, HSP90AA1, HSP90AB1, EGFR	140	306	18913	3.09036	0.999999	0.154697	0.132896
GOTERM_MF_DIRECT	GO:0019825~oxygen binding	3	2.14286	0.0287031	ALB, SOD2, CYP19A1	140	36	18913	11.2577	1	0.168028	0.144348
GOTERM_MF_DIRECT	GO:0034617~tetrahydrobiopterin binding	2	1.42857	0.0290775	NOS2, NOS3	140	4	18913	67.5464	1	0.168028	0.144348
GOTERM_MF_DIRECT	GO:0051022~Rho GDP-dissociation inhibitor binding	2	1.42857	0.0290775	HSP90AA1, RAC1	140	4	18913	67.5464	1	0.168028	0.144348
GOTERM_MF_DIRECT	GO:0045296~cadherin binding	7	5	0.0294265	HSPA8, HSP90AB1, STAT1, SRC, KDR, PTPN11, EGFR	140	316	18913	2.99256	1	0.168028	0.144348
GOTERM_MF_DIRECT	GO:0005525~GTP binding	8	5.71429	0.0295184	CDC42, RAP2A, HSP90AA1, HSP90AB1, LRRK2, RAC1, HRAS, TGM2	140	403	18913	2.68174	1	0.168028	0.144348
GOTERM_MF_DIRECT	GO:0008234~cysteine-type peptidase activity	3	2.14286	0.0317265	CASP7, CTSK, CTSS	140	38	18913	10.6652	1	0.178634	0.15346
GOTERM_MF_DIRECT	GO:0001609~G-protein coupled adenosine receptor activity	2	1.42857	0.0362148	ADORA2A, ADORA3	140	5	18913	54.0371	1	0.196864	0.169121
GOTERM_MF_DIRECT	GO:0004784~superoxide dismutase activity	2	1.42857	0.0362148	SOD2	140	5	18913	54.0371	1	0.196864	0.169121
GOTERM_MF_DIRECT	GO:0005497~androgen binding	2	1.42857	0.0362148	AR, SHBG	140	5	18913	54.0371	1	0.196864	0.169121
GOTERM_MF_DIRECT	GO:0004190~aspartic-type endopeptidase activity	3	2.14286	0.0364845	CASP7, CASP3, REN	140	41	18913	9.88484	1	0.196864	0.169121
GOTERM_MF_DIRECT	GO:0008201~heparin binding	5	3.57143	0.0403304	CTSG, F2, ELANE, PGF, FGFR1	140	175	18913	3.8598	1	0.215373	0.185021
GOTERM_MF_DIRECT	GO:0019955~cytokine binding	3	2.14286	0.0432233	CSF1R, KIT, ELANE	140	45	18913	9.00619	1	0.226559	0.194631
GOTERM_MF_DIRECT	GO:0030911~TPR domain binding	2	1.42857	0.0433	HSP90AA1, HSP90AB1	140	6	18913	45.031	1	0.226559	0.194631
GOTERM_MF_DIRECT	GO:0001784~phosphotyrosine binding	3	2.14286	0.0485563	ZAP70, LCK, PTPN11	140	48	18913	8.4433	1	0.251522	0.216076
GOTERM_MF_DIRECT	GO:0031730~CCR5 chemokine receptor binding	2	1.42857	0.0503334	STAT1, CCL5	140	7	18913	38.598	1	0.258146	0.221766
GOTERM_MF_DIRECT	GO:0044183~protein binding involved in protein folding	3	2.14286	0.0522375	HSPA8, HSP90AA1, HSP90AB1	140	50	18913	8.10557	1	0.265284	0.227899
GOTERM_MF_DIRECT	GO:0005543~phospholipid binding	4	2.85714	0.0586753	SEC14L2, ANXA5, PLA2G2A, F3	140	120	18913	4.5031	1	0.295085	0.2535
GOTERM_MF_DIRECT	GO:0051428~peptide hormone receptor binding	2	1.42857	0.0642466	PTPN11, JAK2	140	9	18913	30.0206	1	0.31695	0.272283
GOTERM_MF_DIRECT	GO:0008432~JUN kinase binding	2	1.42857	0.0642466	GSTP1, PTK2	140	9	18913	30.0206	1	0.31695	0.272283
GOTERM_MF_DIRECT	GO:0051082~unfolded protein binding	4	2.85714	0.0684277	HSPA8, HSP90AA1, HSP90AB1, PPIA	140	128	18913	4.22165	1	0.334392	0.287267
GOTERM_MF_DIRECT	GO:0097199~cysteine-type endopeptidase activity involved in apoptotic signaling pathway	2	1.42857	0.0711272	CASP3, CASP1	140	10	18913	27.0186	1	0.341147	0.29307
GOTERM_MF_DIRECT	GO:0097153~cysteine-type endopeptidase activity involved in apoptotic process	2	1.42857	0.0711272	CASP7, CASP3	140	10	18913	27.0186	1	0.341147	0.29307
GOTERM_MF_DIRECT	GO:0016918~retinal binding	2	1.42857	0.0779575	RBP4, CRABP2	140	11	18913	24.5623	1	0.362403	0.311331
GOTERM_MF_DIRECT	GO:0031996~thioesterase binding	2	1.42857	0.0779575	CDC42, RAC1	140	11	18913	24.5623	1	0.362403	0.311331
GOTERM_MF_DIRECT	GO:0034618~arginine binding	2	1.42857	0.0779575	NOS2, NOS3	140	11	18913	24.5623	1	0.362403	0.311331
GOTERM_MF_DIRECT	GO:0004722~protein serine/threonine phosphatase activity	3	2.14286	0.0783575	PPP1CC, LCK, LRRK2	140	63	18913	6.43299	1	0.362403	0.311331
GOTERM_MF_DIRECT	GO:0016491~oxidoreductase activity	5	3.57143	0.0823972	HSD11B1, CYP2C9, NOS2, CYP2D6, NOS3	140	223	18913	3.02899	1	0.377715	0.324485
GOTERM_MF_DIRECT	GO:0097200~cysteine-type endopeptidase activity involved in execution phase of apoptosis	2	1.42857	0.0847379	CASP7, CASP3	140	12	18913	22.5155	1	0.381689	0.327899
GOTERM_MF_DIRECT	GO:0019211~phosphatase activator activity	2	1.42857	0.0847379	BMP2, MAPK14	140	12	18913	22.5155	1	0.381689	0.327899
GOTERM_MF_DIRECT	GO:0009055~electron carrier activity	3	2.14286	0.0870696	GSR, AKR1B1, CYP19A1	140	67	18913	6.04893	1	0.388811	0.334017
GOTERM_MF_DIRECT	GO:0050660~flavin adenine dinucleotide binding	3	2.14286	0.0892914	NOS2, NOS3, GSR	140	68	18913	5.95998	1	0.395324	0.339612
GOTERM_MF_DIRECT	GO:0008353~RNA polymerase II carboxy-terminal domain kinase activity	2	1.42857	0.0914689	CDK6, CDK4	140	13	18913	20.7835	1	0.398159	0.342047
GOTERM_MF_DIRECT	GO:0039706~co-receptor binding	2	1.42857	0.0914689	BMP2, LRRK2	140	13	18913	20.7835	1	0.398159	0.342047
GOTERM_MF_DIRECT	GO:0016740~transferase activity	4	2.85714	0.0928921	GSTM1, GSTP1, KDR, ABO	140	146	18913	3.70117	1	0.400984	0.344475
GOTERM_MF_DIRECT	GO:0016702~oxidoreductase activity, acting on single donors with incorporation of molecular oxygen, incorporation of two atoms of oxygen	2	1.42857	0.0981507	PTGS2, PTGS1	140	14	18913	19.299	1	0.401114	0.344586
GOTERM_MF_DIRECT	GO:0043394~proteoglycan binding	2	1.42857	0.0981507	CTSK, CTSS	140	14	18913	19.299	1	0.401114	0.344586
GOTERM_MF_DIRECT	GO:0019841~retinol binding	2	1.42857	0.0981507	RBP4, CRABP2	140	14	18913	19.299	1	0.401114	0.344586
GOTERM_MF_DIRECT	GO:0070700~BMP receptor binding	2	1.42857	0.0981507	BMP2, SRC	140	14	18913	19.299	1	0.401114	0.344586
GOTERM_MF_DIRECT	GO:0017154~semaphorin receptor activity	2	1.42857	0.0981507	MET	140	14	18913	19.299	1	0.401114	0.344586
GOTERM_MF_DIRECT	GO:0089720~caspase binding	2	1.42857	0.0981507	CASP1, CTSG	140	14	18913	19.299	1	0.401114	0.344586
GOTERM_MF_DIRECT	GO:0008237~metallopeptidase activity	3	2.14286	0.0983426	ADAM17, MMP2, MMP3	140	72	18913	5.62887	1	0.401114	0.344586

## Sheet: Table S2
Supplement Table 2. The detailed parameters of targets in PPI network
AverageShortestPathLength	BetweennessCentrality	ClosenessCentrality	ClusteringCoefficient	Degree	Eccentricity	EdgeCount	Indegree	IsSingleNode	name	NeighborhoodConnectivity	NumberOfDirectedEdges	NumberOfUndirectedEdges	Outdegree	PartnerOfMultiEdgedNodePairs	Radiality	selected	SelfLoops	shared name	Stress	TopologicalCoefficient
1.29231	0.176582	0.77381	0.223976	94	3	94	5	FALSE	ALB	24.3936	0	94	89	0	0.99689	FALSE	0	ALB	17326	0.190575
1.48462	0.0491848	0.673575	0.341967	68	3	68	5	FALSE	CASP3	29.7059	0	68	63	0	0.994845	FALSE	0	CASP3	7288	0.230278
1.50769	0.0571348	0.663265	0.345093	67	3	67	62	FALSE	SRC	29.8657	0	67	5	0	0.994599	FALSE	0	SRC	8322	0.235163
1.53077	0.0458382	0.653266	0.345734	64	3	64	16	FALSE	EGFR	30.125	0	64	48	0	0.994354	FALSE	0	EGFR	7012	0.237205
1.56154	0.0403638	0.640394	0.365537	60	3	60	19	FALSE	HSP90AA1	30.3	0	60	41	0	0.994026	FALSE	0	HSP90AA1	6162	0.238583
1.59231	0.0354862	0.628019	0.369375	59	3	59	26	FALSE	IGF1	31.2542	0	59	33	0	0.993699	FALSE	0	IGF1	5660	0.25205
1.56923	0.0351998	0.637255	0.400484	58	3	58	18	FALSE	HRAS	31.569	0	58	40	0	0.993944	FALSE	0	HRAS	6028	0.246633
1.63846	0.0530253	0.610329	0.346154	52	3	52	40	FALSE	PPARG	29.9423	0	52	12	0	0.993208	FALSE	0	PPARG	6962	0.241315
1.64615	0.0320656	0.607477	0.398431	51	3	51	45	FALSE	PTGS2	32.4118	0	51	6	0	0.993126	FALSE	0	PTGS2	4968	0.259294
1.66154	0.031835	0.601852	0.401569	51	3	51	15	FALSE	ESR1	31.4902	0	51	36	0	0.992962	FALSE	0	ESR1	5074	0.256018
1.66923	0.017687	0.599078	0.462857	50	3	50	1	FALSE	ANXA5	34.62	0	50	49	0	0.992881	FALSE	0	ANXA5	3036	0.281463
1.71538	0.0130193	0.58296	0.443478	46	3	46	32	FALSE	MMP2	33.9565	0	46	14	0	0.99239	FALSE	0	MMP2	2480	0.280632
1.7	0.0253633	0.588235	0.419192	45	3	45	25	FALSE	MAPK14	33.3778	0	45	20	0	0.992553	FALSE	0	MAPK14	4254	0.269176
1.70769	0.0218095	0.585586	0.408638	43	3	43	29	FALSE	NOS3	32.7907	0	43	14	0	0.992471	FALSE	0	NOS3	3366	0.262326
1.73077	0.0108108	0.577778	0.502769	43	3	43	19	FALSE	KDR	35.6279	0	43	24	0	0.992226	FALSE	0	KDR	2040	0.292032
1.76154	0.0119433	0.567686	0.455285	42	3	42	15	FALSE	ICAM1	33.1429	0	42	27	0	0.991899	FALSE	0	ICAM1	2158	0.278511
1.73077	0.0219345	0.577778	0.502439	41	3	41	38	FALSE	STAT1	36.122	0	41	3	0	0.992226	FALSE	0	STAT1	2962	0.293476
1.74615	0.0107015	0.572687	0.510121	39	3	39	16	FALSE	IL2	35.7436	0	39	23	0	0.992062	FALSE	0	IL2	2204	0.288255
1.76923	0.00601617	0.565217	0.568151	39	3	39	19	FALSE	JAK2	38.2051	0	39	20	0	0.991817	FALSE	0	JAK2	1544	0.315745
1.78462	0.00794934	0.560345	0.526316	39	3	39	3	FALSE	CDC42	34.8974	0	39	36	0	0.991653	FALSE	0	CDC42	1734	0.293256
1.80769	0.00488255	0.553191	0.582888	34	3	34	29	FALSE	PTPN11	36.1471	0	34	5	0	0.991408	FALSE	0	PTPN11	1360	0.298736
1.81538	0.00351401	0.550847	0.611742	33	3	33	14	FALSE	IGF1R	40.1212	0	33	19	0	0.991326	FALSE	0	IGF1R	986	0.33158
1.83077	0.00814988	0.546218	0.554924	33	3	33	17	FALSE	KIT	37.1212	0	33	16	0	0.991162	FALSE	0	KIT	1698	0.311943
1.81538	0.00755022	0.550847	0.496212	33	3	33	4	FALSE	CCL5	34.0606	0	33	29	0	0.991326	FALSE	0	CCL5	1324	0.281493
1.82308	0.0134901	0.548523	0.574597	32	3	32	23	FALSE	PTK2	37.8438	0	32	9	0	0.991244	FALSE	0	PTK2	2312	0.315104
1.80769	0.013551	0.553191	0.363441	31	3	31	25	FALSE	REN	29.1935	0	31	6	0	0.991408	FALSE	0	REN	1788	0.235432
1.81538	0.00320419	0.550847	0.627957	31	3	31	19	FALSE	MAP2K1	40.7742	0	31	12	0	0.991326	FALSE	0	MAP2K1	1008	0.331498
1.83077	0.00510714	0.546218	0.535632	30	3	30	14	FALSE	HSP90AB1	36.7667	0	30	16	0	0.991162	FALSE	0	HSP90AB1	944	0.301366
1.83846	0.00505289	0.543933	0.547126	30	3	30	11	FALSE	HMOX1	36	0	30	19	0	0.99108	FALSE	0	HMOX1	790	0.297521
1.85385	0.00684761	0.539419	0.554187	29	3	29	7	FALSE	CDK4	36.1724	0	29	22	0	0.990917	FALSE	0	CDK4	1518	0.301437
1.86154	0.00675395	0.53719	0.573892	29	3	29	2	FALSE	AR	37.7586	0	29	27	0	0.990835	FALSE	0	AR	1450	0.317299
1.89231	0.00716116	0.528455	0.510582	28	3	28	28	FALSE	XIAP	35.7143	0	28	0	0	0.990507	FALSE	0	XIAP	1544	0.307882
1.86154	0.00341186	0.53719	0.595238	28	3	28	22	FALSE	PGR	39.5357	0	28	6	0	0.990835	FALSE	0	PGR	884	0.329464
1.83846	0.00297153	0.543933	0.65873	28	3	28	8	FALSE	GSK3B	41.25	0	28	20	0	0.99108	FALSE	0	GSK3B	916	0.335366
1.87692	0.00308883	0.532787	0.655271	27	3	27	13	FALSE	LCK	39.1111	0	27	14	0	0.990671	FALSE	0	LCK	906	0.328665
1.88462	0.00316141	0.530612	0.586895	27	3	27	25	FALSE	SELE	37.9259	0	27	2	0	0.990589	FALSE	0	SELE	822	0.321406
1.9	0.00122473	0.526316	0.726154	26	3	26	16	FALSE	MET	42.4615	0	26	10	0	0.990426	FALSE	0	MET	494	0.362919
1.87692	0.019744	0.532787	0.53	25	3	25	18	FALSE	NR3C1	38.04	0	25	7	0	0.990671	FALSE	0	NR3C1	2558	0.316667
2.03077	0.00150275	0.492424	0.623333	25	3	25	17	FALSE	PIK3CB	33.08	0	25	8	0	0.989034	FALSE	0	PIK3CB	374	0.327525
1.92308	0.00469564	0.52	0.565217	24	3	24	20	FALSE	MMP3	37.75	0	24	4	0	0.99018	FALSE	0	MMP3	1208	0.325431
1.92308	0.00926406	0.52	0.318841	24	3	24	7	FALSE	F2	28.1667	0	24	17	0	0.99018	FALSE	0	F2	1280	0.242816
1.86154	0.0052852	0.53719	0.565217	24	3	24	6	FALSE	CDK2	37.9583	0	24	18	0	0.990835	FALSE	0	CDK2	1294	0.306116
1.88462	0.00266439	0.530612	0.644928	24	3	24	10	FALSE	IKBKB	40.5	0	24	14	0	0.990589	FALSE	0	IKBKB	598	0.334711
1.9	0.00301845	0.526316	0.608696	23	3	23	13	FALSE	NOS2	37.6957	0	23	10	0	0.990426	FALSE	0	NOS2	696	0.31413
1.94615	0.00184303	0.513834	0.614719	22	3	22	15	FALSE	NTRK1	39.5	0	22	7	0	0.989935	FALSE	0	NTRK1	554	0.343478
1.94615	0.00138072	0.513834	0.727273	22	3	22	6	FALSE	FGFR1	42.0909	0	22	16	0	0.989935	FALSE	0	FGFR1	430	0.366008
2.02308	0.00193477	0.494297	0.588745	22	3	22	19	FALSE	RAC1	35.5	0	22	3	0	0.989116	FALSE	0	RAC1	448	0.338095
1.95385	0.0159267	0.511811	0.447619	21	3	21	11	FALSE	LRRK2	35.5714	0	21	10	0	0.989853	FALSE	0	LRRK2	2550	0.313949
1.92308	0.00429636	0.52	0.590476	21	3	21	2	FALSE	CASP1	38.5238	0	21	19	0	0.99018	FALSE	0	CASP1	1108	0.323729
1.93077	0.00403322	0.517928	0.547619	21	3	21	10	FALSE	HSPA8	36	0	21	11	0	0.990098	FALSE	0	HSPA8	848	0.307285
2.10769	0.000816	0.474453	0.67619	21	3	21	16	FALSE	PIK3CD	33.3333	0	21	5	0	0.988216	FALSE	0	PIK3CD	206	0.350877
2.03846	0.00152594	0.490566	0.668421	20	3	20	16	FALSE	PIK3CG	35.25	0	20	4	0	0.988953	FALSE	0	PIK3CG	318	0.335714
1.93077	0.0019601	0.517928	0.626316	20	3	20	20	FALSE	SOD2	39.4	0	20	0	0	0.990098	FALSE	0	SOD2	340	0.331092
1.98462	0.00310516	0.503876	0.515789	20	3	20	7	FALSE	F3	34.05	0	20	13	0	0.989525	FALSE	0	F3	628	0.304018
1.96154	0.00100188	0.509804	0.766082	19	3	19	8	FALSE	CDK6	41.3684	0	19	11	0	0.989771	FALSE	0	CDK6	240	0.356624
1.95385	0.00706391	0.511811	0.520468	19	3	19	4	FALSE	CYP19A1	36.4737	0	19	15	0	0.989853	FALSE	0	CYP19A1	1466	0.311741
1.93846	0.00253393	0.515873	0.584795	19	3	19	1	FALSE	BMP2	39.1579	0	19	18	0	0.990016	FALSE	0	BMP2	580	0.329058
1.95385	0.00735985	0.511811	0.379085	18	3	18	10	FALSE	GSTP1	28.7778	0	18	8	0	0.989853	FALSE	0	GSTP1	982	0.245489
1.96923	0.00514332	0.507812	0.509804	18	3	18	3	FALSE	CSF1R	38.5	0	18	15	0	0.989689	FALSE	0	CSF1R	1266	0.331897
2.03846	0.000645	0.490566	0.625	17	4	17	14	FALSE	PGF	37.5882	0	17	3	0	0.988953	FALSE	0	PGF	138	0.344846
1.98462	0.00276461	0.503876	0.566176	17	3	17	9	FALSE	LCN2	33.7647	0	17	8	0	0.989525	FALSE	0	LCN2	540	0.293606
2.02308	0.00288316	0.494297	0.5	17	3	17	16	FALSE	SERPINA1	29.2353	0	17	1	0	0.989116	FALSE	0	SERPINA1	506	0.265775
2.06923	0.00355341	0.483271	0.483333	16	4	16	3	FALSE	CTSG	27.375	0	16	13	0	0.988625	FALSE	0	CTSG	538	0.260119
1.97692	0.00569765	0.505837	0.483333	16	3	16	16	FALSE	VDR	38.8125	0	16	0	0	0.989607	FALSE	0	VDR	1218	0.331731
2.00769	0.00110462	0.498084	0.675	16	3	16	16	FALSE	TEK	41.4375	0	16	0	0	0.98928	FALSE	0	TEK	364	0.366704
2.05385	0.00148377	0.486891	0.583333	16	3	16	5	FALSE	ELANE	30.125	0	16	11	0	0.988789	FALSE	0	ELANE	324	0.281542
2.1	0.000848	0.47619	0.708333	16	3	16	16	FALSE	ZAP70	37.9375	0	16	0	0	0.988298	FALSE	0	ZAP70	230	0.375619
2.01538	0.000896	0.496183	0.571429	15	3	15	13	FALSE	MMP8	38.3333	0	15	2	0	0.989198	FALSE	0	MMP8	260	0.339233
2	0.0160902	0.5	0.647619	15	3	15	6	FALSE	DPP4	43.4667	0	15	9	0	0.989362	FALSE	0	DPP4	1666	0.380702
2.14615	0.000423	0.46595	0.72381	15	3	15	6	FALSE	JAK3	37.2667	0	15	9	0	0.987807	FALSE	0	JAK3	130	0.388194
1.99231	0.00119608	0.501931	0.692308	14	3	14	0	FALSE	AKR1B1	39.5	0	14	14	0	0.989444	FALSE	0	AKR1B1	174	0.337607
2.03846	0.00866374	0.490566	0.538462	14	3	14	5	FALSE	GSR	34.4286	0	14	9	0	0.988953	FALSE	0	GSR	1150	0.312338
2.07692	0.00457297	0.481481	0.285714	14	4	14	1	FALSE	CYP2C9	22.5	0	14	13	0	0.988543	FALSE	0	CYP2C9	520	0.21028
2.00769	0.00097	0.498084	0.736264	14	3	14	13	FALSE	TGFBR1	48.2143	0	14	1	0	0.98928	FALSE	0	TGFBR1	370	0.419255
2.13077	0.002865	0.469314	0.373626	14	4	14	4	FALSE	CTSK	26.9286	0	14	10	0	0.987971	FALSE	0	CTSK	454	0.265912
2.10769	0.00171176	0.474453	0.626374	14	3	14	6	FALSE	MAPK10	35.5714	0	14	8	0	0.988216	FALSE	0	MAPK10	298	0.348739
2.03077	0.0010342	0.492424	0.717949	13	3	13	12	FALSE	ROCK2	46	0	13	1	0	0.989034	FALSE	0	ROCK2	352	0.40708
2.06154	0.000601	0.485075	0.615385	13	4	13	10	FALSE	PRF1	38.6923	0	13	3	0	0.988707	FALSE	0	PRF1	194	0.351748
2.02308	0.000232	0.494297	0.807692	13	3	13	3	FALSE	CASP7	43.8462	0	13	10	0	0.989116	FALSE	0	CASP7	46	0.384615
2.08462	0.0151412	0.479705	0.384615	13	3	13	10	FALSE	RARA	32.9231	0	13	3	0	0.988462	FALSE	0	RARA	2108	0.312821
2.09231	0.00210538	0.477941	0.363636	12	3	12	3	FALSE	ADRBK1	29.9167	0	12	9	0	0.98838	FALSE	0	ADRBK1	318	0.284127
2.20769	0.0155839	0.452962	0.590909	12	3	12	8	FALSE	PRKCQ	34.0833	0	12	4	0	0.987152	FALSE	0	PRKCQ	2266	0.377778
2.02308	0.00221824	0.494297	0.575758	12	3	12	8	FALSE	MMP13	39.5833	0	12	4	0	0.989116	FALSE	0	MMP13	594	0.344203
2	0.00905755	0.5	0.439394	12	3	12	5	FALSE	HPRT1	36.75	0	12	7	0	0.989362	FALSE	0	HPRT1	1216	0.31339
2.14615	0.0132158	0.46595	0.348485	12	3	12	12	FALSE	TYMS	26.5833	0	12	0	0	0.987807	FALSE	0	TYMS	1770	0.268519
2.01538	0.00608776	0.496183	0.545455	11	3	11	0	FALSE	ADRB2	38.5455	0	11	11	0	0.989198	FALSE	0	ADRB2	892	0.329448
2.05385	0.0182547	0.486891	0.490909	11	3	11	4	FALSE	DHFR	36.7273	0	11	7	0	0.988789	FALSE	0	DHFR	2180	0.327922
2.13077	0.00162179	0.469314	0.4	11	4	11	4	FALSE	GC	23.8182	0	11	7	0	0.987971	FALSE	0	GC	148	0.231244
2.19231	0.00200856	0.45614	0.363636	11	4	11	10	FALSE	PTGS1	24.0909	0	11	1	0	0.987316	FALSE	0	PTGS1	274	0.252632
2.06154	0.000152	0.485075	0.711111	10	3	10	0	FALSE	ADAM17	48.6	0	10	10	0	0.988707	FALSE	0	ADAM17	42	0.433929
2.04615	0.000166	0.488722	0.777778	10	3	10	10	FALSE	XBP1	48.2	0	10	0	0	0.988871	FALSE	0	XBP1	38	0.422807
2.10769	0.000743	0.474453	0.555556	10	4	10	10	FALSE	TTR	30.4	0	10	0	0	0.988216	FALSE	0	TTR	128	0.281481
2.11538	0.00113404	0.472727	0.488889	10	4	10	7	FALSE	MMP12	33.4	0	10	3	0	0.988134	FALSE	0	MMP12	364	0.315094
2.11538	0.00126024	0.472727	0.555556	10	4	10	5	FALSE	GSTM1	27.1	0	10	5	0	0.988134	FALSE	0	GSTM1	164	0.25566
2.15385	0.000922	0.464286	0.511111	10	4	10	7	FALSE	RBP4	25.7	0	10	3	0	0.987725	FALSE	0	RBP4	96	0.251961
2.13846	0.000897	0.467626	0.555556	10	4	10	9	FALSE	SHBG	34.2	0	10	1	0	0.987889	FALSE	0	SHBG	108	0.332039
2.26923	0.00399395	0.440678	0.333333	9	4	9	6	FALSE	PDE4D	25.3333	0	9	3	0	0.986498	FALSE	0	PDE4D	540	0.293282
2.06923	0.000637	0.483271	0.555556	9	3	9	6	FALSE	GSTM2	34.4444	0	9	3	0	0.988625	FALSE	0	GSTM2	144	0.30754
2.05385	0.00226976	0.486891	0.333333	9	3	9	6	FALSE	NR1I2	34.3333	0	9	3	0	0.988789	FALSE	0	NR1I2	492	0.30117
2.14615	0.00180364	0.46595	0.388889	9	4	9	3	FALSE	CYP2D6	24.5556	0	9	6	0	0.987807	FALSE	0	CYP2D6	264	0.238403
2.51538	0.0012269	0.397554	0.25	9	4	9	4	FALSE	CTSS	15.6667	0	9	5	0	0.983879	FALSE	0	CTSS	116	0.256831
2.36923	0.000435	0.422078	0.388889	9	4	9	6	FALSE	PPP1CC	25.1111	0	9	3	0	0.985434	FALSE	0	PPP1CC	70	0.334815
2.13077	0.00051	0.469314	0.607143	8	4	8	2	FALSE	FABP4	38.5	0	8	6	0	0.987971	FALSE	0	FABP4	110	0.359813
2.25385	0.000891	0.443686	0.571429	8	4	8	6	FALSE	PTGES	27.625	0	8	2	0	0.986661	FALSE	0	PTGES	136	0.303571
2.41538	0.00130311	0.414013	0.321429	8	4	8	7	FALSE	S100A9	18.625	0	8	1	0	0.984943	FALSE	0	S100A9	158	0.255137
2.24615	0.000871	0.445205	0.535714	8	4	8	3	FALSE	HSD11B1	26.25	0	8	5	0	0.986743	FALSE	0	HSD11B1	122	0.282258
2.33077	0.00028	0.429043	0.571429	8	4	8	6	FALSE	PROCR	26.75	0	8	2	0	0.985843	FALSE	0	PROCR	28	0.330247
2.13077	0.000144	0.469314	0.714286	7	4	7	6	FALSE	PPIA	41.1429	0	7	1	0	0.987971	FALSE	0	PPIA	24	0.384513
2.45385	0.00111874	0.407524	0.380952	7	4	7	7	FALSE	SULT2A1	16.4286	0	7	0	0	0.984534	FALSE	0	SULT2A1	120	0.238095
2.13846	0.000393	0.467626	0.6	6	4	6	3	FALSE	PLA2G2A	40.3333	0	6	3	0	0.987889	FALSE	0	PLA2G2A	132	0.376947
2.12308	6.17e-05	0.471014	0.733333	6	3	6	6	FALSE	TGM2	56	0	6	0	0	0.988052	FALSE	0	TGM2	12	0.518519
2.48462	0.00153657	0.402477	0.266667	6	4	6	0	FALSE	ALOX5AP	16	0	6	6	0	0.984206	FALSE	0	ALOX5AP	164	0.24359
2.19231	0.000197	0.45614	0.4	5	4	5	0	FALSE	ADORA3	39	0	5	5	0	0.987316	FALSE	0	ADORA3	38	0.384158
2.2	0.000154	0.454545	0.7	5	4	5	1	FALSE	BCHE	39.2	0	5	4	0	0.987234	FALSE	0	BCHE	12	0.388119
2.19231	9.95e-05	0.45614	0.6	5	4	5	3	FALSE	HMGCR	44.4	0	5	2	0	0.987316	FALSE	0	HMGCR	12	0.435294
2.5	0.00243926	0.4	0.3	5	4	5	4	FALSE	RARB	18.8	0	5	1	0	0.984043	FALSE	0	RARB	350	0.3
2.21538	7.43e-05	0.451389	0.666667	4	4	4	0	FALSE	ADORA2A	45	0	4	4	0	0.98707	FALSE	0	ADORA2A	26	0.45
2.57692	0.000198	0.38806	0.666667	4	4	4	3	FALSE	STS	26.5	0	4	1	0	0.983224	FALSE	0	STS	50	0.464912
2.77692	0.000118	0.360111	0.333333	3	4	3	2	FALSE	PDE4B	13.6667	0	3	1	0	0.981097	FALSE	0	PDE4B	14	0.416667
2.25385	0.000179	0.443686	0.333333	3	4	3	1	FALSE	CA2	39.6667	0	3	2	0	0.986661	FALSE	0	CA2	40	0.414035
2.97692	0	0.335917	1	3	4	3	2	FALSE	MTHFD1	8.66667	0	3	1	0	0.978969	FALSE	0	MTHFD1	0	0.541667
2.97692	0	0.335917	1	3	4	3	1	FALSE	DHODH	8.66667	0	3	2	0	0.978969	FALSE	0	DHODH	0	0.541667
2.43077	0	0.411392	1	3	4	3	2	FALSE	MAPKAPK2	42	0	3	1	0	0.984779	FALSE	0	MAPKAPK2	0	0.567568
3.05385	0	0.327456	1	2	4	2	0	FALSE	CRABP2	9	0	2	2	0	0.978151	FALSE	0	CRABP2	0	0.642857
2.88462	2.98e-05	0.346667	0	2	4	2	0	FALSE	GPI	13	0	2	2	0	0.979951	FALSE	0	GPI	2	0.571429
2.72308	9.94e-06	0.367232	0	2	4	2	2	FALSE	RAP2A	26.5	0	2	0	0	0.981669	FALSE	0	RAP2A	2	0.6375
3.2	0	0.3125	0	1	4	1	0	FALSE	ADRA2B	12	0	1	1	0	0.976596	FALSE	0	ADRA2B	0	0
2.63077	0	0.380117	0	1	4	1	0	FALSE	CNR2	52	0	1	1	0	0.982651	FALSE	0	CNR2	0	0
2.99231	0	0.33419	0	1	4	1	0	FALSE	DPEP1	15	0	1	1	0	0.978805	FALSE	0	DPEP1	0	0
2.86923	0	0.348525	0	1	4	1	0	FALSE	HTR3A	25	0	1	1	0	0.980115	FALSE	0	HTR3A	0	0
2.72308	0	0.367232	0	1	4	1	1	FALSE	TAP1	41	0	1	0	0	0.981669	FALSE	0	TAP1	0	0

## Sheet: Table S3
Supplement Table 3. Assignment of the differential serum metabolites.
NO.	Metabolites	Class I	Formula	HMDB ID	C VS M	M VS B
1	Phosphatidylcholine(18:2/16:0)	GP	C42H80NO8P	HMDB0008133	↑	↓
2	Dichlorprop-P	Benzene and substituted derivatives	C9H8Cl2O3	-	↑	↓
3	Phe-Ser	Amino acid and Its metabolites	C12H16N2O4	HMDB0029004	↑	↓
4	cis-EODA	FA	C18H34O3	HMDB0061650	↑	↓
5	Methostenol	Others	C28H46O	-	↓	↑
6	HePC	FA	C23H48NO5PS	-	↓	↑
7	4-Guanidinobutyric Acid	Organic acid and Its derivatives	C5H11N3O2	HMDB0003464	↓	↑
8	4-Methylhippuric Acid	Amino acid and Its metabolites	C10H11NO3	HMDB0013292	↓	↑
9	4-toluenesulfonic acid	Organic acid and Its derivatives	C7H7SO3H	-	↓	↑
10	5-(Diphenylphosphinyl)pentanoic acid	Benzene and substituted derivatives	C17H19O3P	-	↓	↑
11	Arg-Gln-Ser-Lys	Amino acid and Its metabolites	C20H39N9O7	-	↓	↑
12	Arg-Val	Amino acid and Its metabolites	C11H23N5O3	HMDB0028722	↓	↑
13	Carmamycin B	Others	C25H45N3O7S	-	↓	↑
14	Glutaryl-7-aminocephalosporanic acid	Heterocyclic compounds	C15H18N2O8S	-	↓	↑
15	Guanidineacetic Acid	Organic acid and Its derivatives	C3H7N3O2	HMDB0000128	↓	↑
16	Guanidinoethyl Sulfonate	Organic acid and Its derivatives	C3H9N3O3S	HMDB0003584	↓	↑
17	Halofantrine	Benzene and substituted derivatives	C26H30Cl2F3NO	HMDB0015349	↓	↑
18	Histamine dihydrochloride	Amino acid and Its metabolites	C5H11Cl2N3	-	↓	↑
19	LPA(18:0/0:0)	GP	C21H43O7P	-	↓	↑
20	LPC(0:0/15:0)	GP	C23H48NO7P	-	↓	↑
21	Ser-Leu-Arg-Glu	Amino acid and Its metabolites	C20H37N7O8	-	↓	↑

## Sheet: Table S4
Supplement Table 4. Differential bacterial genera in terms of relative abundance
Genus	C(mean)	B(mean)	M(mean)	C(se)	B(se)	M(se)	multiGroup(p)	multiGroup(p-corrected)	C::B(p)	M::B(p)	M::C(p)
Prevotella_9	4.63276e-05	0	0.0204867	4.63276e-05	0	0.00406363	1.54301e-05	0.00182847	0.999893	5.00375e-05	5.12919e-05
unclassified_Prevotellaceae	0.000234947	1.98547e-05	0.0147421	0.000109761	1.35633e-05	0.00347137	0.000112519	0.00533339	0.996834	0.000303986	0.000351157
[Clostridium]_innocuum_group	0	0.00131703	0	0	0.000323278	0	0.000157836	0.00557159	0.000447006	0.000447006	1
Blautia	0.000135674	0.0279057	0.000347457	8.61513e-05	0.00691954	0.000233957	0.000192739	0.00557159	0.000518922	0.000557842	0.999227
Akkermansia	0.00212776	0.198146	0.0127798	0.00159641	0.0462791	0.0103007	0.000178988	0.00557159	0.000390032	0.000662662	0.959278
Flavonifractor	0	0.00373268	0	0	0.000986226	0	0.000331769	0.00786293	0.000888182	0.000888182	1
[Eubacterium]_nodatum_group	0.000191928	0.00181339	0.00033422	9.59984e-05	0.000369093	9.41673e-05	0.000211579	0.00557159	0.00039405	0.000930344	0.897914
Erysipelatoclostridium	0	0.0134714	4.96367e-05	0	0.00370627	3.89577e-05	0.00050032	0.00988131	0.00127491	0.00131683	0.999852
Prevotellaceae_UCG_001	0.00113503	0.055785	0.00610862	0.000894113	0.0139434	0.00137797	0.000384733	0.00828924	0.000686795	0.00160966	0.902106
Lachnoclostridium	0.000496367	0.0209467	0.000182001	0.000267461	0.00593941	0.000182001	0.000770736	0.0130475	0.00205348	0.00180569	0.997693
Tuzzerella	0.000172074	0	0.00041033	9.27968e-05	0	7.35189e-05	0.00259778	0.0307414	0.209693	0.0019189	0.0641089
unclassified_Peptococcaceae	0.00136004	7.61095e-05	0.0016711	6.58006e-05	4.01754e-05	0.000454188	0.00166212	0.0218481	0.0101235	0.00193619	0.6926
UBA1819	0.000115819	0.0191564	0.000135674	0.000115819	0.00577625	6.28731e-05	0.00121859	0.0169885	0.00290828	0.00293284	0.99999
unclassified_Clostridia	0.000423566	0.0029782	0.00052284	0.000284953	0.000667719	0.000188125	0.00107001	0.0158495	0.00221837	0.0030655	0.985628
unclassified_Oscillospiraceae	0.0348582	0.00660499	0.0413043	0.00629227	0.00218022	0.0087207	0.00342386	0.0338106	0.0169809	0.00402993	0.755935
NK4A214_group	0.00920926	0.000271347	0.00574131	0.00119889	0.000138572	0.00127932	6.3745e-05	0.00377689	4.5802e-05	0.00458113	0.0702845
Alloprevotella	0.00101921	0	0.00631047	0.000507329	0	0.00202782	0.00458014	0.0387676	0.823726	0.00573138	0.0188717
Anaerostipes	0	0.00239249	0	0	0.000802118	0	0.00283342	0.0307414	0.00626413	0.00626413	1
Eubacterium	0	0.029011	0	0	0.00973487	0	0.00285363	0.0307414	0.00630432	0.00630432	1
UCG_009	0.000714768	0	0.00130048	0.00020098	0	0.000391083	0.00887004	0.0553211	0.148683	0.00666205	0.263452
Candidatus_Soleaferrea	0	0.000274656	0	0	9.41673e-05	0	0.00339334	0.0338106	0.00736654	0.00736654	1
Incertae_Sedis	0.00352089	0.00602258	0.000870296	0.00133373	0.00114185	0.00041421	0.0113944	0.0664958	0.238067	0.00854667	0.203336
[Ruminococcus]_torques_group	0	0.0099538	0	0	0.00348837	0	0.00403423	0.0382445	0.00860324	0.00860324	1
Peptococcus	6.61822e-06	0	0.000158837	6.61822e-06	0	5.5923e-05	0.00515727	0.0407424	0.988652	0.009324	0.0124296
Sutterella	0	9.59642e-05	0	0	3.41657e-05	0	0.00455844	0.0387676	0.00959777	0.00959777	1
Holdemania	0	0.000585713	0	0	0.000218025	0	0.00637257	0.0471968	0.0129445	0.0129445	1
unclassified_[Clostridium]_methylpentosum_group	0	0.000145601	0	0	5.46554e-05	0	0.00677693	0.0486707	0.0136735	0.0136735	1
unclassified_Clostridia_vadinBB60_group	0.00107877	9.92733e-06	0.0013071	0.000232374	9.92733e-06	0.000434765	0.0127485	0.0702649	0.0448385	0.0148237	0.839334
unclassified_Desulfovibrionaceae	0.0011251	0.000575785	0.00298813	0.000337516	0.000307031	0.000799229	0.0147191	0.0792825	0.749277	0.0151725	0.0623956
Faecalibaculum	0	0.00891143	2.64729e-05	0	0.00340202	2.64729e-05	0.0077386	0.0509458	0.0152421	0.0155333	0.99995
unclassified_Atopobiaceae	0	0	0.000228329	0	0	8.84592e-05	0.00849997	0.0544457	1	0.0167243	0.0167243
Bilophila	9.92733e-06	0.000655204	0.000145601	9.92733e-06	0.000207795	8.44958e-05	0.00755249	0.0509458	0.00818377	0.0353074	0.744045
unclassified_Muribaculaceae	0.162236	0.108807	0.22042	0.0222577	0.00825693	0.0457033	0.0556181	0.212605	0.432403	0.0448954	0.373832
GCA_900066755	0	0.00059564	0	0	0.000276543	0	0.027011	0.128032	0.0463093	0.0463093	1
Phocea	0	0.000135674	0	0	6.3497e-05	0	0.0282737	0.131389	0.0481951	0.0481951	1
